# Supplementary material for: Signature identification of relapse-related overall survival of early lung adenocarcinoma after radical surgery
Source: PubMed Central journal article supplement (PMC8349519; doi:10.7717/peerj.11923), 2021-08-05

**A Risk score ROC curve**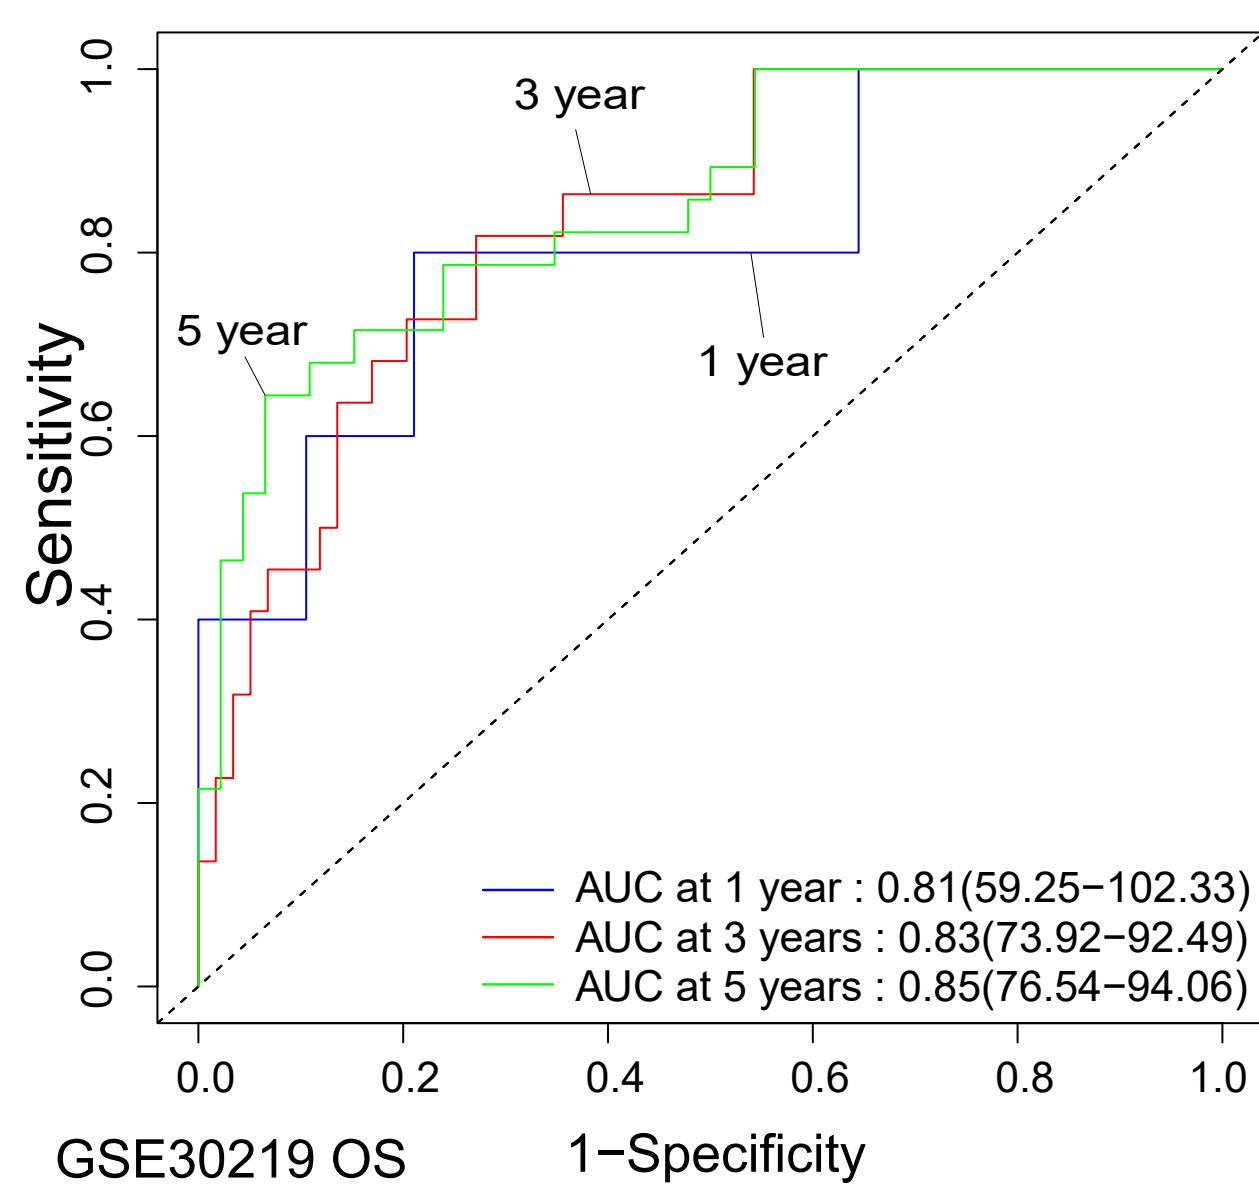**B**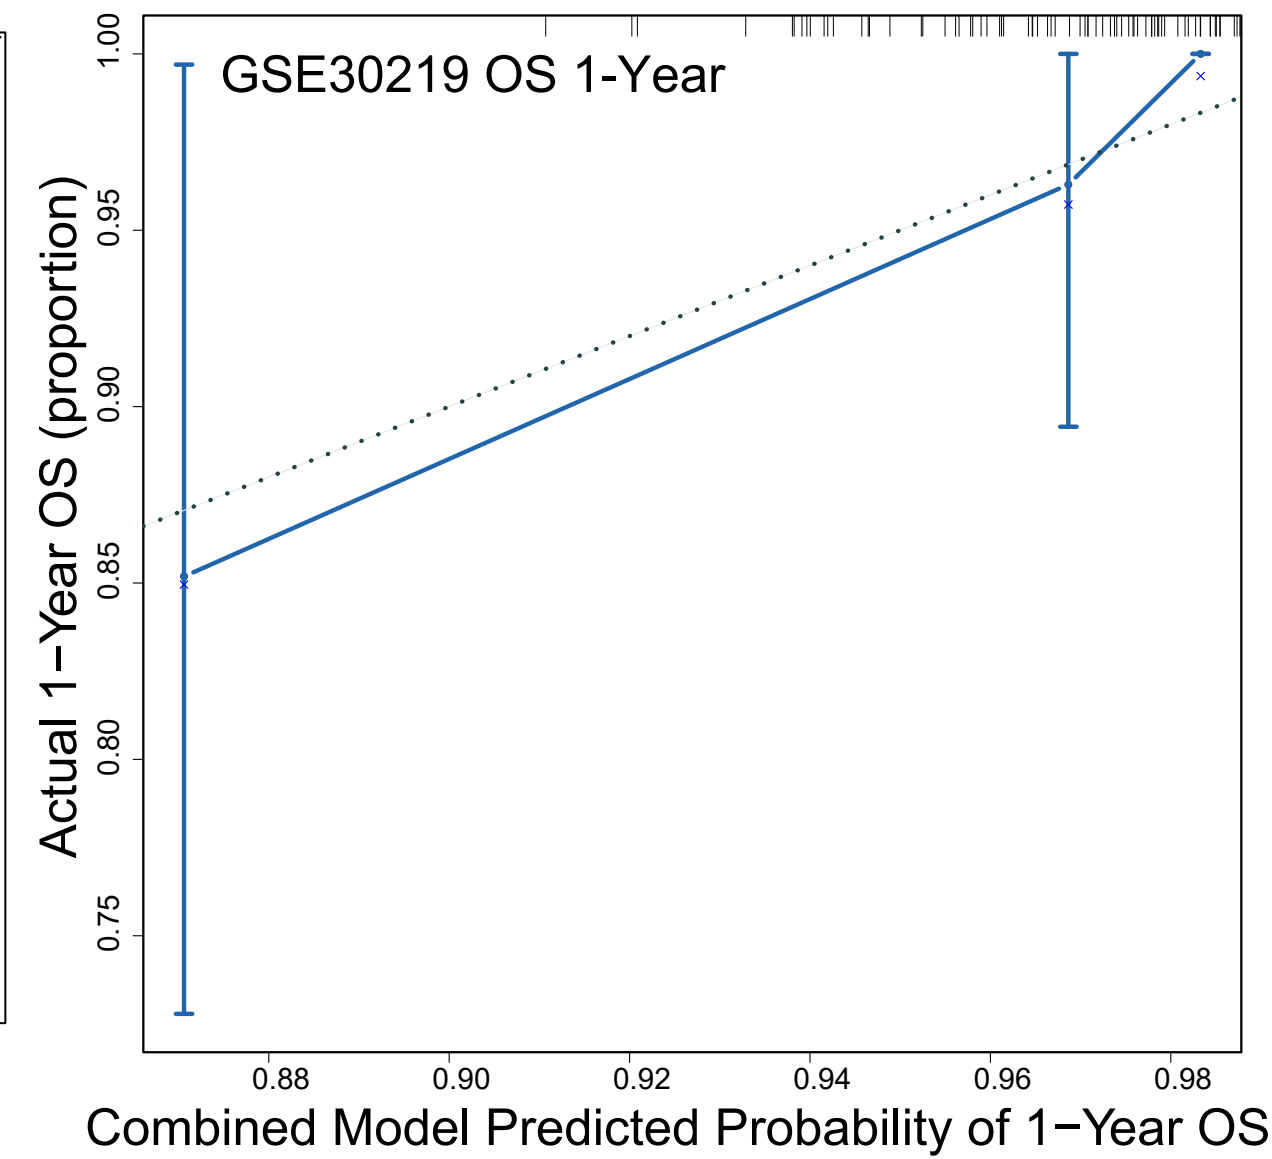**C**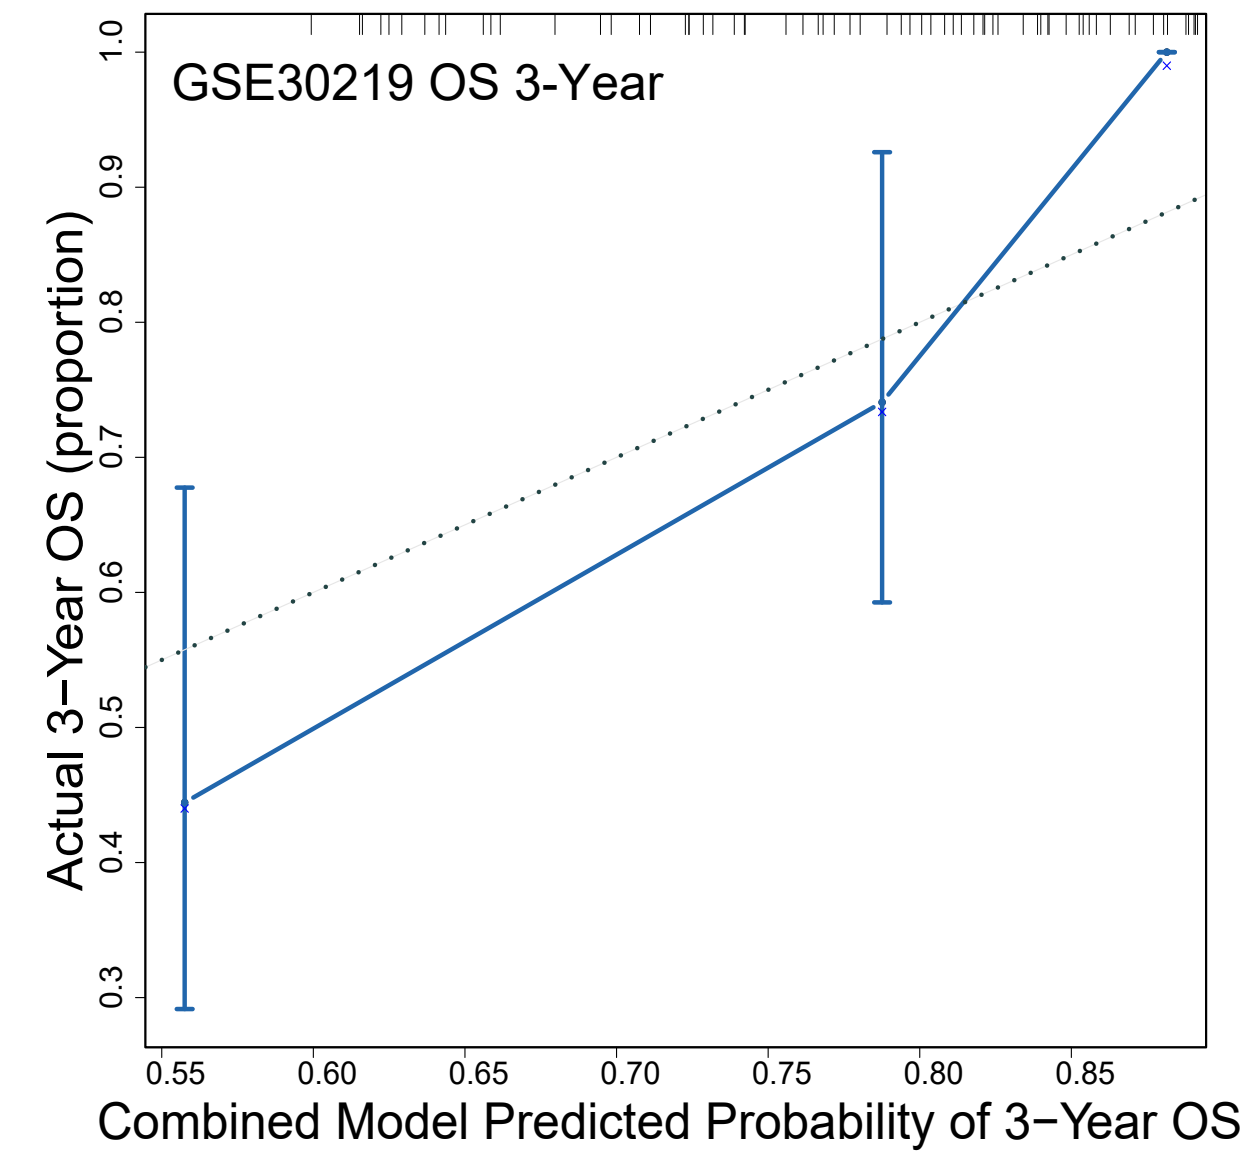**D**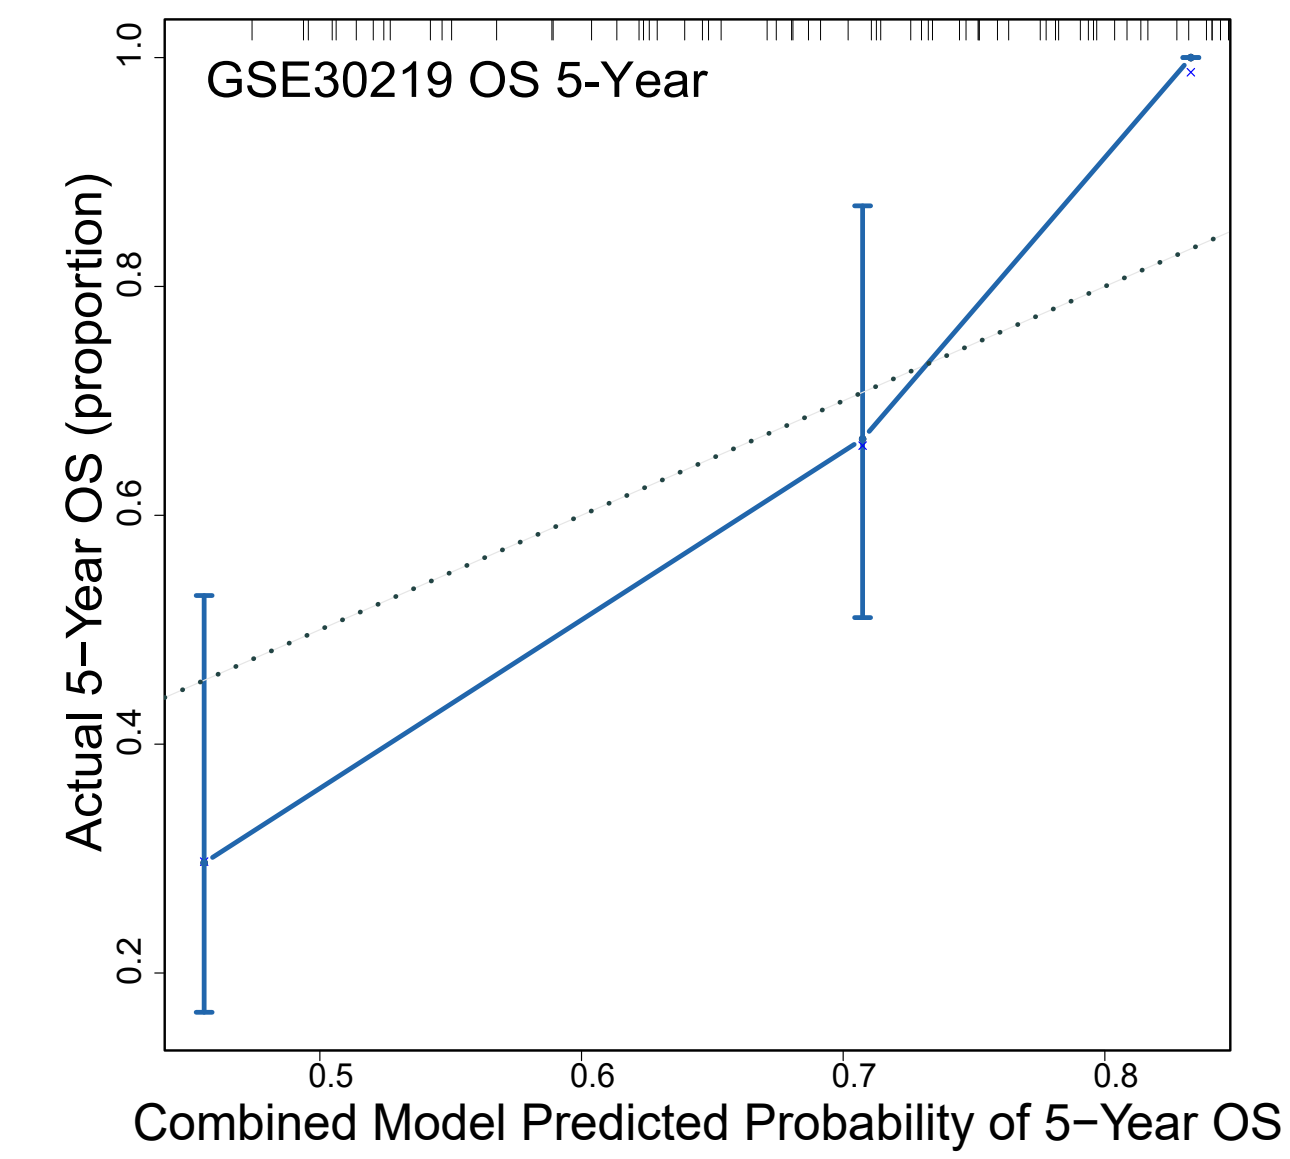**E Risk score ROC curve**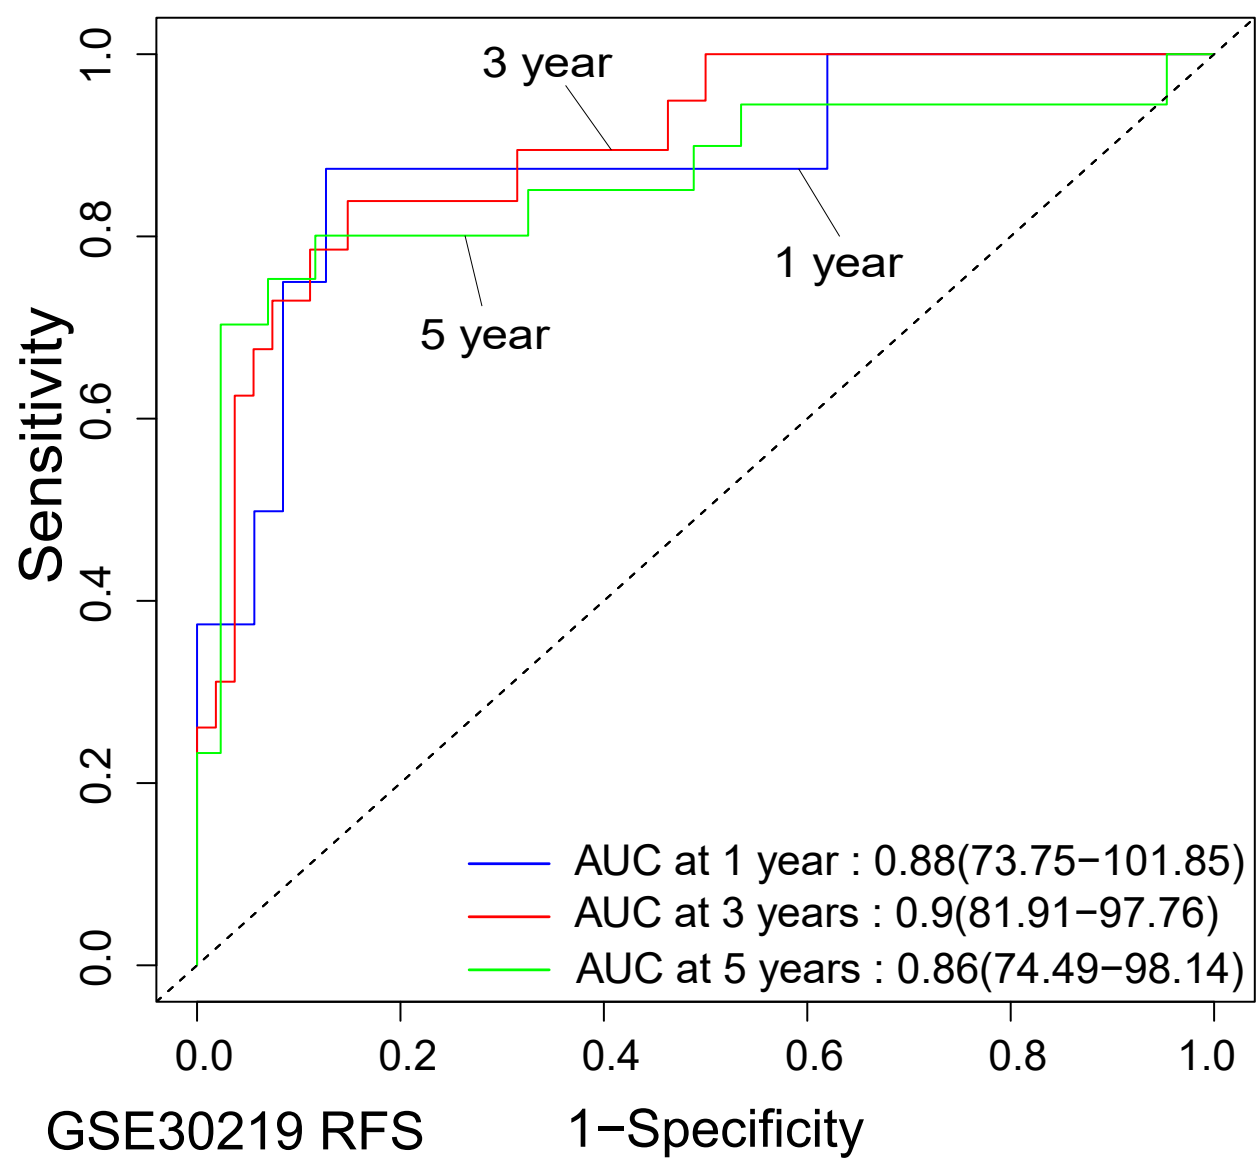**F**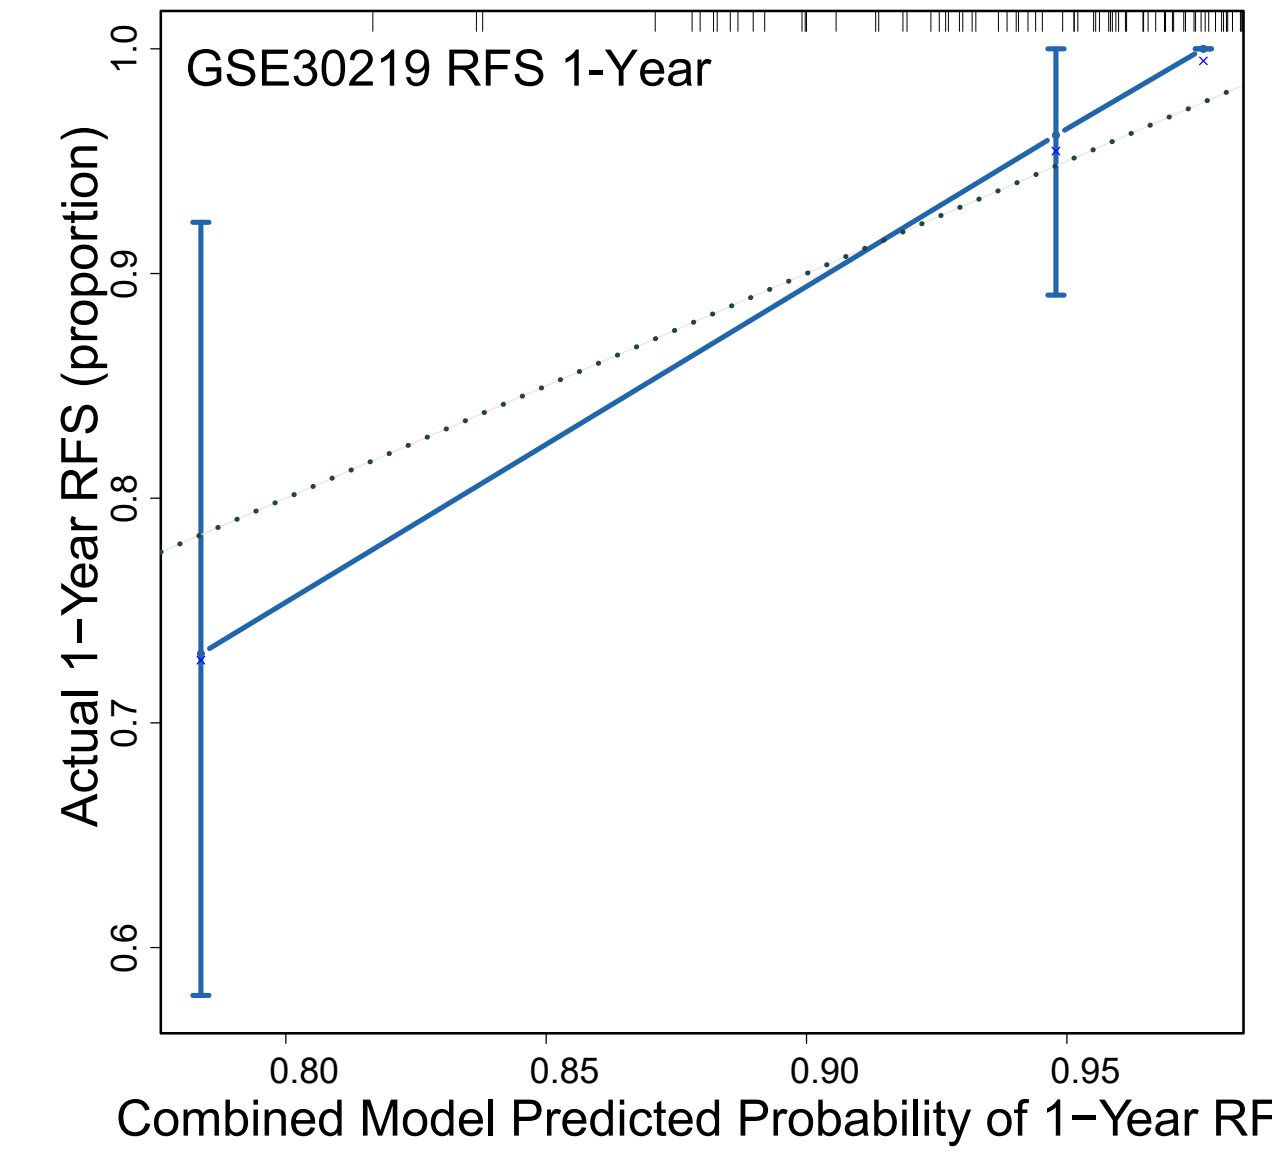**G**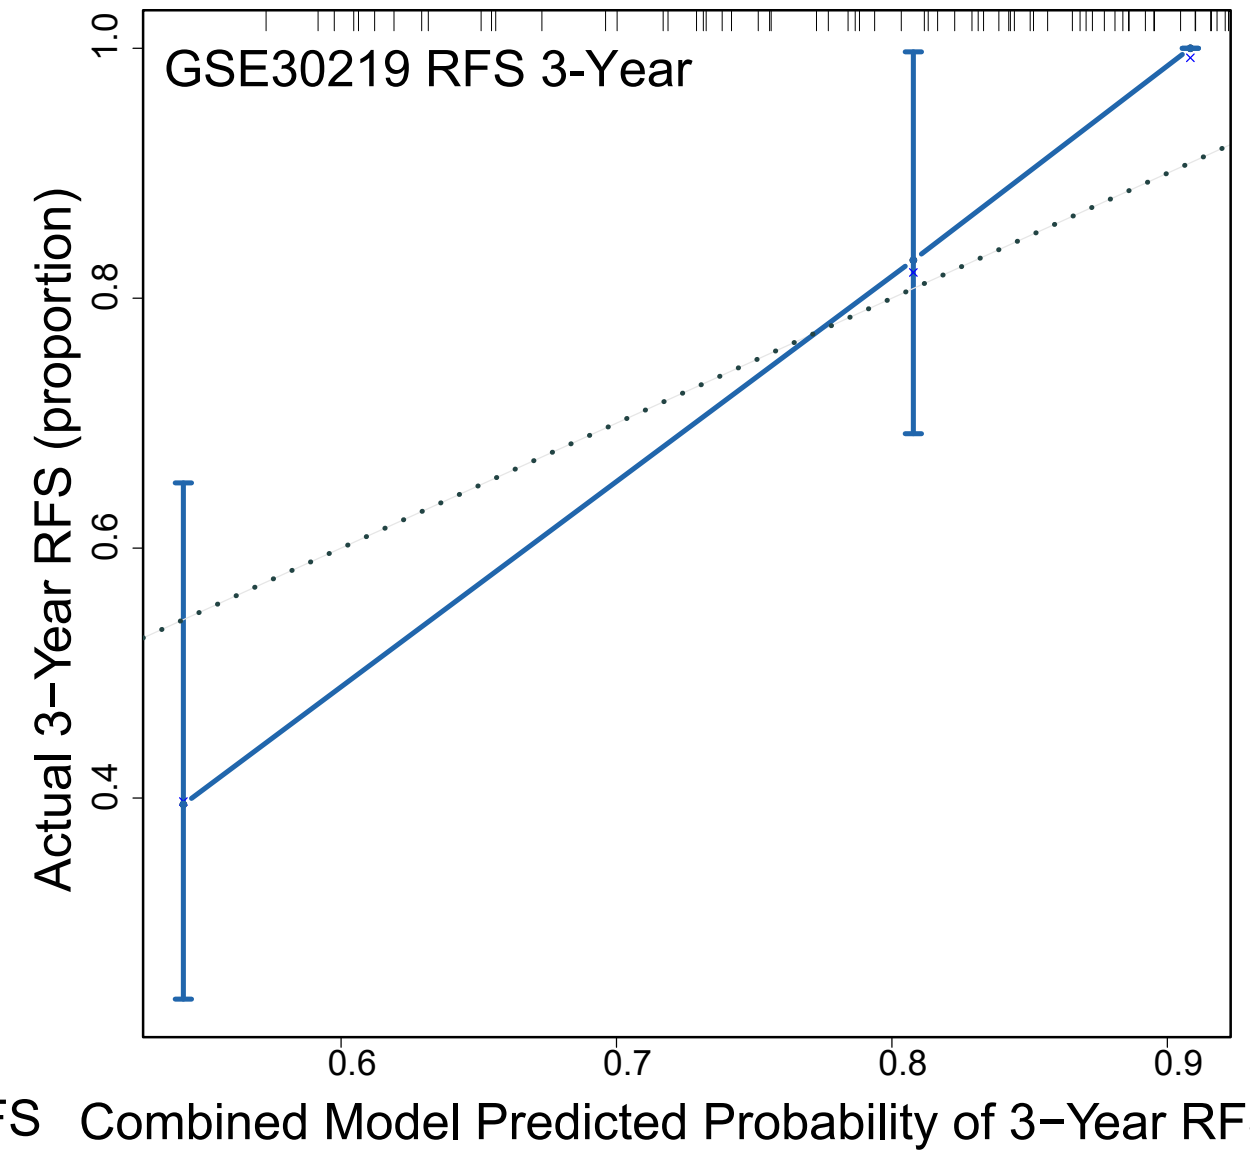**H**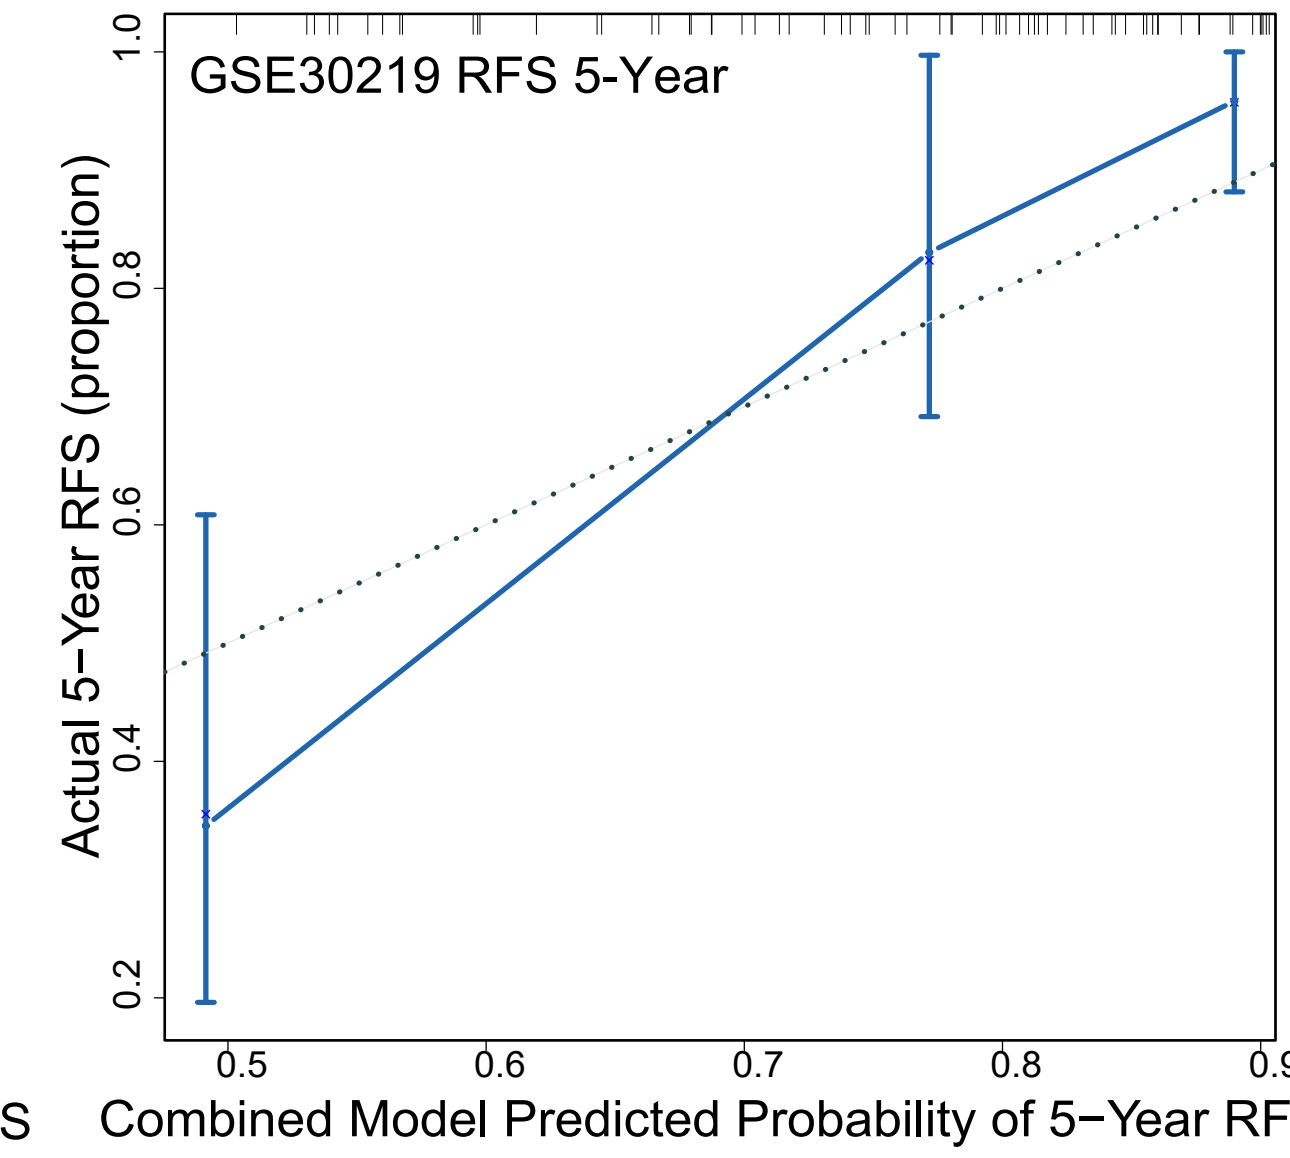

Supplement: peerj-09-11923-s002.pdf [file peerj-09-11923-s002.pdf]
