# Supplementary material for: Signature identification of relapse-related overall survival of early lung adenocarcinoma after radical surgery
Source: PeerJ. 2021 Aug 5;9:e11923. doi: 10.7717/peerj.11923 (PMC8349519; doi:10.7717/peerj.11923)
Supplement: Supplemental Information 1 [file peerj-09-11923-s001.xlsx]

## Sheet: Supplement Table 1
TCGA_OS					OS_genes_differential_expression
gene_id	Hazard.Ratio	CI95	P.Value		log2FoldChange	pvalue	padj	expr_status
ENSG00000000460.15	1.41	1.01-1.96	0.044		1.6281	1.13658e-34	1.12079e-32	up
ENSG00000001626.13	0.85	0.76-0.96	0.006		-1.52081	1.1733e-05	4.70874e-05	down
ENSG00000003400.13	0.75	0.58-0.97	0.031		-0.158907	0.205176	0.307216	none
ENSG00000004139.12	0.64	0.47-0.88	0.006		-0.430768	0.00143866	0.00394372	down
ENSG00000004478.7	1.61	1.21-2.15	0.001		1.0366	3.48629e-12	3.54797e-11	up
ENSG00000004660.13	0.59	0.42-0.83	0.002		-0.366412	0.0148848	0.0321531	down
ENSG00000004948.12	1.28	1.04-1.56	0.017		0.800087	0.0301952	0.0598225	none
ENSG00000005102.11	0.76	0.61-0.95	0.018		-0.867616	0.00261525	0.00676952	down
ENSG00000005379.14	0.82	0.67-1	0.049		-0.538799	0.00693834	0.0162827	down
ENSG00000005469.10	0.74	0.56-1	0.047		0.0302165	0.820173	0.880122	none
ENSG00000005844.16	0.83	0.69-0.99	0.043		-1.46445	7.65289e-13	8.47555e-12	down
ENSG00000006062.12	0.68	0.52-0.9	0.008		-0.909241	1.45003e-10	1.20194e-09	down
ENSG00000006831.9	1.5	1.02-2.2	0.041		-0.644413	1.21498e-09	8.81213e-09	down
ENSG00000007174.16	0.88	0.79-1	0.043		-2.58888	4.13787e-08	2.42553e-07	down
ENSG00000008441.15	0.82	0.69-0.99	0.036		-1.48444	1.06398e-12	1.1588e-11	down
ENSG00000009830.10	1.5	1.03-2.19	0.036		0.497172	1.81487e-06	8.31067e-06	up
ENSG00000010072.14	1.83	1.11-3.02	0.017		0.5835	1.06736e-11	1.02996e-10	up
ENSG00000010292.11	1.36	1.03-1.8	0.029		0.94918	1.14373e-10	9.62586e-10	up
ENSG00000010379.14	0.6	0.42-0.86	0.006		-3.30987	1.20429e-27	6.27798e-26	down
ENSG00000011422.10	1.3	1.05-1.61	0.016		0.389465	0.0554271	0.101388	none
ENSG00000011426.9	1.35	1.14-1.6	0		3.90665	5.65844e-54	3.48525e-51	up
ENSG00000011478.10	0.61	0.42-0.88	0.008		0.714751	2.39513e-11	2.20846e-10	up
ENSG00000012048.18	1.25	1-1.56	0.048		1.15824	1.73482e-10	1.42216e-09	up
ENSG00000015676.16	1.64	1.04-2.56	0.032		0.223719	0.0212873	0.0440239	up
ENSG00000018625.13	0.82	0.68-1	0.045		-2.35873	2.95174e-16	4.94666e-15	down
ENSG00000019102.10	0.85	0.76-0.95	0.005		-1.51561	8.81166e-06	3.60719e-05	down
ENSG00000019549.7	1.31	1.1-1.55	0.002		0.516376	0.0317097	0.0624585	none
ENSG00000019582.13	0.84	0.72-0.97	0.018		-0.602118	0.00395507	0.00982779	down
ENSG00000020577.12	1.23	1.01-1.49	0.043		-0.771731	6.27082e-05	0.000222807	down
ENSG00000021300.12	0.78	0.65-0.94	0.008		-0.358692	0.08721	0.149685	none
ENSG00000021826.13	1.08	1.02-1.14	0.007		5.18099	2.14772e-18	4.60311e-17	up
ENSG00000022556.14	0.9	0.82-0.99	0.033		0.966322	0.0132955	0.0290716	up
ENSG00000024526.15	1.23	1.04-1.45	0.013		3.72116	1.18601e-46	3.51884e-44	up
ENSG00000025156.11	0.54	0.32-0.93	0.027		0.0292423	0.747415	0.827422	none
ENSG00000025434.17	0.7	0.5-0.99	0.045		-0.390934	0.00437083	0.0107614	down
ENSG00000028528.13	0.5	0.29-0.85	0.01		-0.861388	6.41325e-26	2.84973e-24	down
ENSG00000029153.13	1.17	1-1.37	0.049		2.29109	9.34884e-16	1.47999e-14	up
ENSG00000029364.10	1.8	1.1-2.94	0.02		0.308911	0.000129807	0.000435038	up
ENSG00000030304.11	0.69	0.48-0.97	0.035		-1.91973	6.85876e-11	5.96303e-10	down
ENSG00000035403.15	1.52	1.1-2.1	0.011		-0.452327	0.000228838	0.000733118	down
ENSG00000035499.11	1.25	1.05-1.49	0.014		3.64788	5.59957e-52	2.91149e-49	up
ENSG00000035687.9	1.72	1.07-2.78	0.025		0.722654	3.31962e-16	5.51929e-15	up
ENSG00000036448.8	0.77	0.61-0.97	0.027		-1.60415	7.87427e-12	7.68538e-11	down
ENSG00000036473.6	0.55	0.32-0.93	0.026		-4.0906	4.67006e-25	1.92554e-23	down
ENSG00000036565.13	0.62	0.4-0.95	0.026		-0.0813491	0.81842	0.8789	none
ENSG00000037965.5	1.24	1.05-1.45	0.009		2.64164	1.84306e-09	1.30323e-08	up
ENSG00000040275.15	1.51	1.12-2.03	0.006		1.19413	8.04778e-18	1.61343e-16	up
ENSG00000042781.11	0.59	0.36-0.96	0.034		0.154859	0.546822	0.664397	none
ENSG00000042813.6	0.42	0.21-0.87	0.02		-1.12618	0.00962719	0.0218352	down
ENSG00000043093.12	1.72	1.11-2.66	0.016		0.358214	7.10079e-05	0.00024966	up
ENSG00000046604.11	1.25	1.01-1.54	0.038		1.52298	1.26253e-13	1.53591e-12	up
ENSG00000047346.11	0.6	0.4-0.9	0.014		0.0906629	0.371775	0.495671	none
ENSG00000047579.18	0.49	0.27-0.91	0.023		0.0262182	0.742725	0.823712	none
ENSG00000047936.9	0.9	0.8-1	0.048		-0.694117	0.0266178	0.0535889	none
ENSG00000048342.14	0.72	0.55-0.95	0.02		-0.885712	4.07127e-10	3.16254e-09	down
ENSG00000050130.16	1.82	1.09-3.02	0.021		0.164414	0.0429233	0.0813982	none
ENSG00000050344.8	1.35	1.1-1.67	0.005		1.62494	1.3702e-15	2.11969e-14	up
ENSG00000051108.13	0.73	0.54-0.99	0.044		0.313373	0.00836969	0.0192614	up
ENSG00000053747.14	1.16	1.03-1.32	0.019		-1.2644	7.74604e-05	0.000270187	down
ENSG00000053770.10	2.17	1.24-3.8	0.007		-0.00983246	0.899625	0.935978	none
ENSG00000053918.14	0.86	0.75-1	0.048		-0.511148	0.03126	0.0616618	none
ENSG00000054277.11	1.21	1.02-1.43	0.024		0.541253	0.0176869	0.0373872	up
ENSG00000057294.12	1.24	1.08-1.41	0.002		1.14274	0.00070778	0.00206355	up
ENSG00000058063.14	1.5	1.01-2.23	0.043		0.0815804	0.405382	0.529264	none
ENSG00000059377.14	0.79	0.64-0.98	0.032		-0.490594	0.00434506	0.0107045	down
ENSG00000060138.11	1.52	1.05-2.18	0.026		-0.218151	0.0592984	0.107604	none
ENSG00000060718.17	1.11	1.03-1.2	0.01		6.79657	1.65549e-55	1.16279e-52	up
ENSG00000063245.13	1.64	1.02-2.63	0.041		-0.0713173	0.434185	0.557583	none
ENSG00000063660.7	1.3	1.04-1.62	0.02		0.372149	0.0474667	0.088786	none
ENSG00000064201.14	0.72	0.56-0.92	0.009		-1.7805	2.91157e-16	4.88957e-15	down
ENSG00000064225.11	0.73	0.57-0.95	0.018		-1.01343	1.41403e-08	8.83737e-08	down
ENSG00000064692.17	0.77	0.6-0.99	0.043		-0.799574	0.000184843	0.000602292	down
ENSG00000064886.12	0.81	0.7-0.93	0.003		-1.69969	1.43848e-08	8.97754e-08	down
ENSG00000065328.15	1.21	1.02-1.43	0.027		3.20972	5.08669e-36	5.67272e-34	up
ENSG00000065802.10	1.58	1.08-2.31	0.019		-0.398875	1.00252e-06	4.77866e-06	down
ENSG00000066279.15	1.35	1.13-1.61	0.001		3.52473	3.6656e-50	1.52694e-47	up
ENSG00000066405.11	0.92	0.85-0.99	0.034		-4.76023	2.42782e-22	7.75123e-21	down
ENSG00000067057.15	1.41	1.14-1.75	0.002		1.91761	2.18007e-20	5.74596e-19	up
ENSG00000067191.14	0.82	0.67-1	0.046		0.190927	0.348369	0.470827	none
ENSG00000067533.5	1.68	1.03-2.75	0.038		0.31838	0.00027651	0.000872576	up
ENSG00000067704.9	1.6	1.05-2.44	0.028		0.865838	1.33308e-19	3.24248e-18	up
ENSG00000068489.11	1.28	1.06-1.55	0.011		2.19911	1.22747e-24	4.89959e-23	up
ENSG00000068903.18	0.6	0.38-0.95	0.029		-0.342047	0.000260242	0.000825533	down
ENSG00000069275.12	2.05	1.31-3.22	0.002		0.352088	1.55645e-05	6.11403e-05	up
ENSG00000069482.6	1.13	1.02-1.25	0.018		5.66373	5.98273e-26	2.67029e-24	up
ENSG00000070031.3	1.35	1.02-1.78	0.036		0.8739	0.000986353	0.00279751	up
ENSG00000070081.14	0.67	0.49-0.92	0.012		0.565316	3.94795e-05	0.000145102	up
ENSG00000070214.14	1.6	1.12-2.27	0.009		0.286326	0.00968158	0.0219399	up
ENSG00000070367.14	1.64	1.09-2.48	0.018		-0.0220602	0.82285	0.882067	none
ENSG00000070371.14	1.31	1.03-1.68	0.028		0.171956	0.336508	0.458357	none
ENSG00000070404.8	1.39	1.14-1.69	0.001		-1.04629	3.58722e-07	1.82976e-06	down
ENSG00000070413.17	1.56	1.07-2.29	0.022		-0.0484783	0.655234	0.755166	none
ENSG00000070501.10	1.41	1.06-1.89	0.02		1.18227	5.59665e-15	7.9853e-14	up
ENSG00000070718.10	1.7	1.12-2.59	0.014		-0.00685001	0.957981	0.974099	none
ENSG00000070756.12	1.59	1.16-2.2	0.004		1.2434	1.19877e-18	2.64239e-17	up
ENSG00000070950.8	1.59	1.01-2.5	0.045		0.367513	4.21134e-05	0.000154034	up
ENSG00000071655.16	1.54	1.03-2.29	0.035		-0.497395	3.76079e-07	1.91318e-06	down
ENSG00000072571.18	1.36	1.13-1.64	0.001		3.23214	1.50737e-43	3.50867e-41	up
ENSG00000072682.17	1.39	1.04-1.87	0.027		0.20335	0.148282	0.234817	none
ENSG00000072818.10	0.8	0.65-0.99	0.044		0.0137759	0.940551	0.963387	none
ENSG00000073578.15	1.46	1.03-2.08	0.034		0.684483	1.91415e-09	1.34945e-08	up
ENSG00000073849.13	0.77	0.6-0.98	0.037		0.366765	0.0231867	0.0474883	up
ENSG00000074317.9	1.51	1.06-2.14	0.022		0.82194	0.0429508	0.0814348	none
ENSG00000074660.14	0.73	0.57-0.93	0.012		-1.5338	2.71665e-16	4.58533e-15	down
ENSG00000074800.12	1.45	1.02-2.06	0.036		1.40966	7.45088e-31	5.28907e-29	up
ENSG00000075213.9	1.13	1.01-1.27	0.037		1.8579	1.93356e-08	1.18403e-07	up
ENSG00000075218.17	1.26	1.05-1.51	0.012		2.86738	4.21855e-36	4.73092e-34	up
ENSG00000075388.3	1.74	1.2-2.52	0.004		0.490691	0.644456	0.746246	none
ENSG00000075391.15	1.44	1.07-1.94	0.017		-0.705474	1.43356e-07	7.76961e-07	down
ENSG00000075426.10	1.31	1.02-1.68	0.038		-0.474929	0.00295299	0.00756694	down
ENSG00000075618.16	1.23	1.05-1.45	0.009		0.824525	0.00100429	0.00284305	up
ENSG00000075884.11	0.79	0.63-0.99	0.044		-0.626154	0.000237906	0.000759675	down
ENSG00000076382.15	1.21	1.01-1.44	0.037		2.77287	7.74689e-39	1.14872e-36	up
ENSG00000076864.18	0.87	0.77-0.99	0.033		0.57818	0.034009	0.0664382	none
ENSG00000077152.8	1.23	1.01-1.51	0.038		3.22462	1.43495e-56	1.12647e-53	up
ENSG00000077498.8	2.2	1.12-4.34	0.023		0.650708	0.325395	0.445949	none
ENSG00000077935.15	1.16	1.01-1.32	0.031		3.18932	2.01318e-15	3.04494e-14	up
ENSG00000078399.14	1.2	1-1.43	0.047		0.575351	0.114783	0.1893	none
ENSG00000078589.11	0.8	0.65-0.98	0.032		0.523543	0.0240262	0.0489748	up
ENSG00000078668.12	1.48	1.07-2.06	0.017		0.629416	9.80082e-06	3.98523e-05	up
ENSG00000079112.8	1.12	1.01-1.23	0.024		3.06481	6.84326e-12	6.72147e-11	up
ENSG00000080298.14	0.71	0.52-0.97	0.031		-0.808114	5.85372e-08	3.35135e-07	down
ENSG00000080573.6	1.2	1.02-1.42	0.025		0.193539	0.401476	0.525312	none
ENSG00000080815.17	1.82	1.09-3.04	0.022		0.185676	0.0165069	0.0351901	up
ENSG00000080822.15	1.71	1.12-2.63	0.014		0.0516502	0.574257	0.68792	none
ENSG00000080824.17	1.53	1.03-2.27	0.037		0.441598	0.000127503	0.000427925	up
ENSG00000080986.11	1.23	1.03-1.45	0.02		2.94166	2.55536e-36	2.95684e-34	up
ENSG00000081665.12	0.42	0.3-0.6	0		-0.102293	0.362882	0.486174	none
ENSG00000083097.13	0.69	0.49-0.97	0.034		-0.455394	4.22705e-05	0.000154552	down
ENSG00000083168.8	1.51	1.1-2.08	0.012		-0.275706	0.0330313	0.0647589	none
ENSG00000083444.15	1.54	1.08-2.2	0.017		0.853771	6.50241e-13	7.25559e-12	up
ENSG00000083535.14	0.56	0.36-0.86	0.009		0.164532	0.120526	0.197227	none
ENSG00000085741.11	0.81	0.65-1	0.046		-1.93399	8.70126e-14	1.08087e-12	down
ENSG00000086062.11	1.55	1.1-2.19	0.013		0.563863	3.71713e-06	1.61953e-05	up
ENSG00000086991.11	1.21	1.01-1.47	0.043		1.55384	3.07962e-12	3.15657e-11	up
ENSG00000087076.7	0.81	0.67-0.99	0.044		-0.501918	0.010686	0.0239583	down
ENSG00000087128.8	1.1	1.01-1.21	0.038		6.50074	2.40392e-44	5.94094e-42	up
ENSG00000087303.15	1.23	1.05-1.45	0.011		0.439878	0.0631124	0.113593	none
ENSG00000087586.16	1.25	1.03-1.52	0.026		2.42624	1.55942e-28	8.84318e-27	up
ENSG00000087589.15	0.8	0.65-0.99	0.036		-1.72026	4.62699e-18	9.49981e-17	down
ENSG00000088325.14	1.25	1.07-1.47	0.005		3.59901	1.82129e-47	5.92822e-45	up
ENSG00000088854.12	0.68	0.48-0.96	0.03		-1.4026	3.69575e-30	2.47017e-28	down
ENSG00000089220.4	0.67	0.46-0.96	0.028		-0.477069	9.93277e-05	0.0003398	down
ENSG00000089639.9	0.67	0.45-0.98	0.04		-0.265383	0.00840594	0.0193347	down
ENSG00000089685.13	1.23	1.04-1.45	0.013		3.70661	4.06513e-51	1.87071e-48	up
ENSG00000089902.9	1.56	1.05-2.33	0.029		-0.320887	0.00376266	0.00939631	down
ENSG00000090512.10	1.72	1.23-2.4	0.002		3.4621	3.81672e-08	2.24814e-07	up
ENSG00000090661.10	0.81	0.67-0.98	0.029		-0.101604	0.644869	0.746549	none
ENSG00000090889.11	1.23	1.04-1.46	0.016		3.70884	3.36017e-52	1.7937e-49	up
ENSG00000091136.12	1.31	1.05-1.64	0.018		-0.234474	0.189405	0.287781	none
ENSG00000091490.9	0.76	0.59-0.98	0.033		0.896896	2.34994e-12	2.43736e-11	up
ENSG00000092051.15	0.7	0.52-0.94	0.016		-2.71831	1.60275e-37	2.09698e-35	down
ENSG00000092439.12	0.62	0.39-0.99	0.044		-0.239446	0.00836537	0.0192536	down
ENSG00000092445.10	1.33	1.06-1.66	0.013		-0.0273142	0.882155	0.923942	none
ENSG00000092853.12	1.22	1.02-1.46	0.028		2.4871	3.90356e-25	1.62288e-23	up
ENSG00000093000.17	1.77	1.13-2.79	0.013		0.263451	0.004901	0.0119244	up
ENSG00000093009.8	1.21	1.03-1.43	0.024		2.91748	6.60754e-34	6.08136e-32	up
ENSG00000093134.12	0.82	0.68-1	0.046		-1.35222	4.93385e-05	0.000178342	down
ENSG00000094841.12	0.5	0.32-0.77	0.002		-0.236517	0.00999625	0.0225725	down
ENSG00000095585.15	0.75	0.58-0.98	0.032		0.459909	0.00224056	0.00588835	up
ENSG00000095587.8	1.35	1.1-1.65	0.004		2.84774	7.65559e-20	1.91262e-18	up
ENSG00000095713.12	0.84	0.75-0.93	0.001		-2.78622	1.00842e-14	1.39501e-13	down
ENSG00000095752.5	1.26	1.02-1.54	0.03		2.61153	1.85323e-17	3.55856e-16	up
ENSG00000096006.10	1.16	1.01-1.33	0.039		-1.62887	0.00602013	0.0143167	down
ENSG00000096060.13	1.25	1.03-1.52	0.023		-0.0110401	0.960462	0.975545	none
ENSG00000096696.12	1.2	1.04-1.39	0.015		2.20914	3.0593e-16	5.11407e-15	up
ENSG00000097007.16	1.72	1.06-2.78	0.027		-0.0545587	0.561935	0.677211	none
ENSG00000097021.18	1.62	1.16-2.25	0.004		0.188179	0.160773	0.250983	none
ENSG00000099617.3	1.29	1.05-1.58	0.017		5.09115	9.59188e-21	2.60353e-19	up
ENSG00000099822.2	1.37	1.09-1.71	0.006		1.8794	4.32139e-11	3.84726e-10	up
ENSG00000099937.9	0.89	0.8-0.99	0.03		-0.496445	0.310958	0.430362	none
ENSG00000099942.11	1.57	1.08-2.27	0.017		-0.163202	0.0894077	0.15286	none
ENSG00000099953.8	1.12	1-1.24	0.046		6.1085	3.35482e-73	1.67892e-69	up
ENSG00000100003.16	1.24	1-1.53	0.047		1.0104	1.10375e-06	5.22215e-06	up
ENSG00000100012.10	0.77	0.6-0.97	0.028		-3.31896	6.7863e-12	6.67066e-11	down
ENSG00000100030.13	1.48	1.06-2.06	0.02		-0.115795	0.267685	0.381864	none
ENSG00000100038.18	1.8	1.13-2.85	0.013		0.315876	0.0414564	0.0789754	none
ENSG00000100101.14	0.45	0.21-0.98	0.044		-0.126845	0.689587	0.782105	none
ENSG00000100162.13	1.26	1.02-1.55	0.034		1.53528	8.18124e-15	1.14526e-13	up
ENSG00000100221.9	1.92	1.24-2.99	0.004		0.0633941	0.544562	0.662325	none
ENSG00000100297.14	1.43	1.03-1.98	0.035		0.648153	1.2777e-06	5.98785e-06	up
ENSG00000100304.12	1.52	1.14-2.02	0.004		0.914745	1.50249e-10	1.24156e-09	up
ENSG00000100335.11	1.64	1.03-2.61	0.038		0.151856	0.141916	0.226383	none
ENSG00000100380.11	1.78	1.16-2.72	0.009		0.0867922	0.388446	0.512602	none
ENSG00000100401.18	1.71	1.17-2.51	0.006		0.524086	1.14962e-06	5.42379e-06	up
ENSG00000100412.14	1.65	1.08-2.52	0.02		-0.144897	0.136237	0.218823	none
ENSG00000100442.9	1.5	1.12-2	0.006		1.11951	4.00285e-19	9.26883e-18	up
ENSG00000100473.14	1.15	1.01-1.31	0.037		3.60841	3.5683e-24	1.36447e-22	up
ENSG00000100479.11	1.26	1.01-1.58	0.044		2.05957	6.50785e-26	2.88536e-24	up
ENSG00000100504.15	1.42	1.12-1.8	0.004		0.422195	0.0232355	0.0475737	up
ENSG00000100522.7	1.5	1.15-1.95	0.002		1.65459	1.98717e-25	8.49077e-24	up
ENSG00000100526.18	1.33	1.11-1.59	0.002		2.96622	1.04441e-35	1.11802e-33	up
ENSG00000100528.10	1.37	1.03-1.81	0.03		0.459677	2.34084e-05	8.93402e-05	up
ENSG00000100558.7	1.29	1.05-1.58	0.016		2.7628	2.91918e-42	5.96286e-40	up
ENSG00000100578.13	1.65	1.03-2.64	0.037		0.0662927	0.486778	0.608051	none
ENSG00000100591.6	1.93	1.22-3.06	0.005		0.633264	1.52039e-10	1.25532e-09	up
ENSG00000100603.12	2.18	1.17-4.07	0.014		0.182115	0.0148642	0.0321175	up
ENSG00000100628.10	0.72	0.57-0.9	0.004		-0.18376	0.346294	0.468655	none
ENSG00000100714.14	1.84	1.27-2.69	0.001		0.661551	9.48675e-09	6.03738e-08	up
ENSG00000100802.13	1.59	1.01-2.51	0.047		0.407785	1.62165e-05	6.35204e-05	up
ENSG00000100852.11	1.44	1.03-2.02	0.034		0.158233	0.175409	0.269844	none
ENSG00000100934.13	1.38	1.08-1.78	0.012		0.638893	3.9074e-06	1.69524e-05	up
ENSG00000101057.14	1.15	1-1.31	0.044		3.98652	9.49072e-47	2.90054e-44	up
ENSG00000101188.4	1.15	1.02-1.3	0.024		0.212749	0.532329	0.650923	none
ENSG00000101384.10	1.31	1.05-1.64	0.016		-0.367569	0.0627917	0.113087	none
ENSG00000101417.10	0.82	0.7-0.96	0.012		-0.938801	8.71196e-06	3.5704e-05	down
ENSG00000101443.16	0.87	0.75-1	0.044		2.05653	9.81525e-17	1.74109e-15	up
ENSG00000101447.12	1.33	1.1-1.6	0.003		2.29515	6.99407e-23	2.35109e-21	up
ENSG00000101448.12	0.66	0.47-0.91	0.012		-2.14824	1.10602e-06	5.23163e-06	down
ENSG00000101638.12	0.62	0.44-0.89	0.009		-0.042482	0.892748	0.931437	none
ENSG00000101849.14	1.38	1.05-1.81	0.02		0.896861	5.96199e-09	3.90534e-08	up
ENSG00000101892.10	0.34	0.12-0.98	0.045		0.237437	0.6672	0.764949	none
ENSG00000101938.13	0.87	0.77-0.98	0.026		-2.56592	1.65122e-16	2.85319e-15	down
ENSG00000102032.11	0.79	0.63-0.99	0.045		-0.927174	2.03854e-07	1.08199e-06	down
ENSG00000102043.14	0.61	0.43-0.86	0.006		-0.362561	0.0331435	0.0649503	none
ENSG00000102172.14	1.57	1.09-2.25	0.015		0.739125	2.47362e-09	1.71517e-08	up
ENSG00000102245.6	0.79	0.63-0.99	0.039		-0.926652	0.000264723	0.000838352	down
ENSG00000102312.19	1.39	1-1.93	0.049		0.477225	0.000284196	0.000895348	up
ENSG00000102384.12	1.28	1.03-1.58	0.026		2.4256	8.745e-29	5.12613e-27	up
ENSG00000102385.11	1.39	1.15-1.66	0		2.86169	2.25844e-17	4.29543e-16	up
ENSG00000102401.18	0.64	0.44-0.93	0.019		-0.103807	0.269154	0.38351	none
ENSG00000102409.9	0.73	0.59-0.9	0.003		-0.742551	6.16688e-05	0.000219425	down
ENSG00000102531.15	0.73	0.54-0.99	0.04		0.0581391	0.608179	0.716507	none
ENSG00000102543.13	0.54	0.32-0.92	0.023		-0.593475	1.30234e-13	1.5805e-12	down
ENSG00000102547.17	0.66	0.48-0.91	0.011		-1.28729	3.0857e-20	7.99088e-19	down
ENSG00000102738.7	0.54	0.32-0.93	0.025		-0.123549	0.15474	0.243243	none
ENSG00000102805.12	0.66	0.46-0.97	0.032		-0.405473	0.00048424	0.00146009	down
ENSG00000102967.10	0.63	0.43-0.94	0.023		0.0976608	0.348206	0.470718	none
ENSG00000103044.9	0.84	0.74-0.96	0.01		-0.116282	0.714118	0.801533	none
ENSG00000103091.13	0.63	0.41-0.97	0.037		0.282536	0.00214806	0.00566945	up
ENSG00000103316.9	0.9	0.81-1	0.045		0.808155	0.0259186	0.0523788	none
ENSG00000103319.10	0.67	0.46-0.97	0.035		-0.204149	0.0569693	0.103853	none
ENSG00000103365.14	0.57	0.36-0.91	0.018		-0.941316	1.08109e-24	4.32825e-23	down
ENSG00000103495.12	1.52	1.01-2.29	0.045		0.534395	7.60178e-08	4.28413e-07	up
ENSG00000103647.11	0.76	0.6-0.97	0.024		-2.31369	3.89806e-26	1.77143e-24	down
ENSG00000103811.14	0.85	0.72-0.99	0.043		-0.755388	0.0029409	0.00754031	down
ENSG00000103888.14	1.14	1-1.29	0.048		1.83794	1.9124e-09	1.34861e-08	up
ENSG00000104140.6	1.18	1.05-1.33	0.007		2.91657	1.6205e-16	2.80372e-15	up
ENSG00000104219.11	0.8	0.64-1	0.046		-0.567383	0.000411879	0.00125878	down
ENSG00000104312.7	1.43	1.07-1.92	0.016		0.356378	0.0176857	0.0373872	up
ENSG00000104325.5	1.51	1.01-2.24	0.044		-0.155337	0.179419	0.274861	none
ENSG00000104327.6	1.16	1.03-1.31	0.017		-0.284336	NA	NA	none
ENSG00000104331.7	1.5	1.08-2.08	0.015		0.279113	0.00987498	0.0223326	up
ENSG00000104419.13	1.26	1-1.58	0.047		0.513769	0.00842377	0.0193724	up
ENSG00000104472.8	1.6	1.1-2.35	0.015		0.375279	0.000982129	0.0027875	up
ENSG00000104537.15	1.19	1.01-1.39	0.035		0.185463	0.65466	0.754679	none
ENSG00000104613.10	0.66	0.45-0.98	0.041		0.08003	0.460268	0.582977	none
ENSG00000104738.15	1.27	1.01-1.59	0.042		2.07038	1.92189e-28	1.08068e-26	up
ENSG00000104826.10	1.36	1.01-1.82	0.043		1.46894	2.57845e-06	1.15303e-05	up
ENSG00000104848.1	1.47	1.09-1.98	0.012		2.60425	9.28139e-09	5.91609e-08	up
ENSG00000104870.11	0.72	0.54-0.95	0.022		-0.637861	3.49539e-06	1.53109e-05	down
ENSG00000104881.13	1.32	1.04-1.69	0.024		0.0821476	0.620066	0.726089	none
ENSG00000104899.5	1.2	1.02-1.42	0.028		0.748725	0.0474054	0.0886879	none
ENSG00000104938.15	0.59	0.37-0.93	0.022		-5.06584	3.60825e-36	4.11567e-34	down
ENSG00000105011.7	1.25	1-1.55	0.047		2.34741	1.30663e-36	1.5523e-34	up
ENSG00000105048.15	1.1	1-1.21	0.04		2.92816	3.52628e-12	3.58775e-11	up
ENSG00000105141.5	1.14	1.02-1.27	0.021		3.76465	8.86751e-05	0.000306051	up
ENSG00000105220.13	1.35	1-1.82	0.048		1.04867	2.63604e-15	3.93206e-14	up
ENSG00000105419.16	1.27	1.01-1.59	0.042		0.667564	0.000696373	0.00203266	up
ENSG00000105519.11	0.83	0.71-0.97	0.02		-1.5154	2.13531e-09	1.49535e-08	down
ENSG00000105605.6	1.95	1-3.8	0.049		1.21294	0.060284	0.109175	none
ENSG00000105607.11	0.48	0.3-0.76	0.002		0.199277	0.0252104	0.0510998	none
ENSG00000105641.3	0.84	0.74-0.96	0.012		1.93487	3.31972e-05	0.000123383	up
ENSG00000105695.13	0.69	0.48-1	0.048		-2.32253	3.06976e-08	1.83325e-07	down
ENSG00000105708.8	0.6	0.41-0.88	0.009		-0.0244733	0.819197	0.879357	none
ENSG00000105723.10	1.58	1.01-2.47	0.045		0.228244	0.00999025	0.0225622	up
ENSG00000105849.5	1.67	1.12-2.5	0.012		0.543795	2.30447e-07	1.21637e-06	up
ENSG00000105875.12	0.73	0.54-0.98	0.036		-0.0673711	0.625554	0.730528	none
ENSG00000105889.13	1.2	1-1.42	0.045		1.47726	6.02979e-06	2.54061e-05	up
ENSG00000105926.14	1.29	1-1.66	0.047		1.07045	2.93362e-10	2.33268e-09	up
ENSG00000105953.13	1.52	1.02-2.28	0.04		-0.397328	7.05536e-05	0.000248258	down
ENSG00000106263.16	1.52	1.04-2.22	0.029		0.925584	9.70128e-15	1.34581e-13	up
ENSG00000106278.10	0.88	0.78-0.99	0.027		1.54102	0.000316862	0.000988689	up
ENSG00000106443.13	1.8	1.2-2.69	0.004		0.643148	8.5633e-11	7.33976e-10	up
ENSG00000106477.17	1.57	1.01-2.44	0.047		0.521709	1.14798e-06	5.41667e-06	up
ENSG00000106628.9	1.45	1.02-2.07	0.041		0.876954	1.07961e-13	1.32709e-12	up
ENSG00000106636.6	1.53	1.03-2.28	0.037		0.834542	6.93313e-14	8.70687e-13	up
ENSG00000106948.15	0.75	0.57-0.98	0.038		-0.608434	1.61078e-05	6.3132e-05	down
ENSG00000107317.10	0.87	0.75-1	0.045		-1.83292	2.98244e-13	3.47192e-12	down
ENSG00000107521.17	0.65	0.44-0.98	0.038		-0.273651	0.00182388	0.0048912	down
ENSG00000107742.11	0.81	0.68-0.98	0.027		-3.41728	4.63947e-55	3.20251e-52	down
ENSG00000107859.8	2.12	1.35-3.33	0.001		0.251485	0.562537	0.677692	none
ENSG00000107968.8	0.68	0.5-0.93	0.015		-1.14688	1.42558e-13	1.72378e-12	down
ENSG00000107984.8	1.15	1.05-1.25	0.002		1.97204	2.91854e-05	0.00010952	up
ENSG00000108106.12	1.27	1.01-1.58	0.04		1.47152	2.72694e-15	4.0631e-14	up
ENSG00000108506.10	1.54	1-2.36	0.048		0.291474	0.00429897	0.0106058	up
ENSG00000108592.15	2.02	1.18-3.47	0.011		0.387592	2.48738e-05	9.45904e-05	up
ENSG00000108671.8	1.49	1.01-2.19	0.046		0.750369	6.34081e-13	7.08515e-12	up
ENSG00000108821.12	1.16	1.02-1.32	0.022		3.0595	1.43944e-27	7.43603e-26	up
ENSG00000108924.12	0.88	0.78-0.99	0.04		-1.23501	7.94546e-05	0.000276396	down
ENSG00000109205.15	0.73	0.54-0.98	0.037		-3.90162	5.34025e-20	1.35318e-18	down
ENSG00000109255.10	1.19	1.06-1.34	0.004		4.33515	4.20238e-27	2.09002e-25	up
ENSG00000109705.7	1.28	1.05-1.55	0.012		3.56523	2.26222e-15	3.39723e-14	up
ENSG00000109805.8	1.18	1-1.39	0.046		3.10644	9.48599e-37	1.14392e-34	up
ENSG00000110218.7	1.48	1.01-2.16	0.044		0.706947	5.47306e-11	4.8137e-10	up
ENSG00000110427.13	1.27	1.07-1.51	0.005		1.6888	3.68291e-08	2.17412e-07	up
ENSG00000110448.9	0.82	0.67-0.99	0.039		-0.00144066	0.994753	0.996979	none
ENSG00000110665.10	0.76	0.6-0.96	0.024		-1.88663	1.8217e-17	3.50138e-16	down
ENSG00000110723.10	0.64	0.48-0.85	0.002		-0.378284	0.0149979	0.0323644	down
ENSG00000110934.9	0.81	0.66-1	0.045		-1.01839	5.03825e-08	2.91575e-07	down
ENSG00000110975.7	1.93	1.18-3.16	0.009		-2.94318	6.83505e-06	2.85407e-05	down
ENSG00000111206.11	1.24	1.06-1.46	0.009		3.23837	1.3937e-40	2.39476e-38	up
ENSG00000111275.11	0.71	0.58-0.86	0.001		-1.1553	1.33671e-09	9.63391e-09	down
ENSG00000111339.9	0.77	0.61-0.97	0.03		-2.53069	3.23178e-20	8.33683e-19	down
ENSG00000111341.8	0.83	0.69-0.99	0.036		-0.649815	0.00276518	0.00712445	down
ENSG00000111640.13	1.39	1.08-1.79	0.012		1.78184	7.99473e-29	4.70701e-27	up
ENSG00000111665.10	1.22	1.02-1.46	0.033		2.99789	1.60105e-40	2.72764e-38	up
ENSG00000111679.15	0.53	0.34-0.81	0.004		-0.738633	1.7193e-12	1.81189e-11	down
ENSG00000111696.10	1.56	1.13-2.16	0.007		0.749056	6.00855e-07	2.96218e-06	up
ENSG00000111796.3	0.78	0.63-0.97	0.024		-0.594884	0.00560497	0.0134339	down
ENSG00000111799.19	1.14	1.02-1.28	0.021		0.239117	0.436444	0.559958	none
ENSG00000112053.12	0.58	0.39-0.84	0.004		0.332731	0.142416	0.227009	none
ENSG00000112115.5	0.53	0.3-0.96	0.037		1.47883	0.0338027	0.0660707	none
ENSG00000112116.9	0.26	0.09-0.75	0.013		-0.218337	0.745295	0.825845	none
ENSG00000112137.15	0.81	0.67-0.99	0.041		-2.23617	2.12228e-25	9.04872e-24	down
ENSG00000112343.10	0.54	0.33-0.9	0.018		0.0275006	0.73264	0.816115	none
ENSG00000112378.11	1.42	1.11-1.8	0.005		1.19909	2.19063e-12	2.27921e-11	up
ENSG00000112511.16	0.54	0.31-0.93	0.025		-0.209795	0.00795375	0.0184078	down
ENSG00000112559.12	1.19	1.03-1.37	0.016		1.45962	1.44846e-08	9.03418e-08	up
ENSG00000112655.14	0.8	0.64-0.99	0.042		0.765108	3.03967e-06	1.34397e-05	up
ENSG00000112796.8	0.75	0.61-0.92	0.007		0.39146	0.0388863	0.0746334	none
ENSG00000112818.8	0.7	0.52-0.96	0.025		0.402042	0.231522	0.339023	none
ENSG00000112984.10	1.31	1.08-1.6	0.007		3.2302	3.85324e-50	1.55827e-47	up
ENSG00000113083.11	1.19	1.01-1.4	0.036		0.808761	0.000354562	0.00109734	up
ENSG00000113262.13	0.72	0.52-0.99	0.044		-0.188865	0.54634	0.663892	none
ENSG00000113356.9	1.33	1.03-1.72	0.029		0.679833	0.000318127	0.000992406	up
ENSG00000113368.10	1.25	1-1.56	0.047		1.74097	5.61474e-22	1.72651e-20	up
ENSG00000113811.9	0.59	0.39-0.89	0.013		0.00588793	0.955546	0.972674	none
ENSG00000113812.12	0.55	0.31-0.99	0.048		0.135176	0.060705	0.109824	none
ENSG00000113966.8	0.62	0.4-0.97	0.035		-0.893814	7.28769e-15	1.02845e-13	down
ENSG00000114166.7	0.76	0.58-1	0.047		-1.1431	3.45551e-16	5.74045e-15	down
ENSG00000114316.11	0.48	0.29-0.79	0.004		-0.100413	0.141111	0.225269	none
ENSG00000114346.12	1.34	1.08-1.67	0.009		2.08723	4.83903e-30	3.18991e-28	up
ENSG00000114383.8	0.53	0.31-0.92	0.024		0.0407986	0.612816	0.720401	none
ENSG00000114395.9	0.61	0.39-0.97	0.035		0.350945	0.000510031	0.0015303	up
ENSG00000114416.16	1.58	1.01-2.48	0.047		0.325321	0.000321151	0.00100114	up
ENSG00000114737.14	0.79	0.65-0.95	0.012		-0.149622	0.46473	0.587142	none
ENSG00000114812.11	0.83	0.7-0.98	0.029		-3.63291	2.0886e-50	9.08905e-48	down
ENSG00000114841.16	0.81	0.66-0.99	0.04		-1.03331	4.28825e-09	2.87434e-08	down
ENSG00000114859.13	1.39	1.03-1.87	0.032		1.06455	2.17315e-15	3.2733e-14	up
ENSG00000115009.10	1.13	1.02-1.25	0.024		1.18658	0.00139344	0.00383001	up
ENSG00000115163.13	1.19	1.01-1.4	0.043		3.51796	5.79342e-42	1.12051e-39	up
ENSG00000115325.12	0.7	0.52-0.96	0.026		-0.454427	7.53256e-05	0.000263268	down
ENSG00000115592.10	0.4	0.2-0.79	0.009		-1.48962	2.05665e-06	9.34834e-06	down
ENSG00000115841.18	0.7	0.54-0.9	0.007		-0.604343	0.000776412	0.00224599	down
ENSG00000116161.16	1.4	1.03-1.92	0.034		0.965781	2.86676e-17	5.39857e-16	up
ENSG00000116199.10	1.91	1.15-3.17	0.012		-0.246084	0.00292711	0.0075088	down
ENSG00000116237.14	1.66	1.05-2.61	0.03		0.556372	3.20999e-10	2.53232e-09	up
ENSG00000116285.11	1.35	1.08-1.68	0.008		0.751102	0.000316842	0.000988689	up
ENSG00000116299.15	0.89	0.8-0.99	0.033		1.24965	0.000422107	0.00128748	up
ENSG00000116406.17	1.52	1.05-2.2	0.026		0.562587	1.52592e-08	9.49072e-08	up
ENSG00000116690.10	0.87	0.77-0.99	0.034		-3.18948	3.68333e-16	6.09867e-15	down
ENSG00000116698.19	1.69	1.07-2.65	0.024		0.506403	5.35685e-10	4.09054e-09	up
ENSG00000116745.6	1.47	1.19-1.81	0		0.792148	0.0886695	0.151855	none
ENSG00000116747.11	1.67	1.11-2.52	0.014		0.300245	0.000491776	0.00148158	up
ENSG00000116750.12	1.61	1.07-2.4	0.021		0.71246	1.89454e-14	2.547e-13	up
ENSG00000116824.4	0.82	0.68-1	0.047		0.0202058	0.92449	0.952737	none
ENSG00000116885.17	0.68	0.5-0.93	0.017		-0.813053	4.72402e-08	2.74563e-07	down
ENSG00000116903.7	1.84	1.11-3.07	0.018		-0.0175272	0.832859	0.889064	none
ENSG00000116906.10	1.69	1.03-2.75	0.036		0.457496	1.20244e-07	6.60097e-07	up
ENSG00000116962.13	1.26	1.03-1.55	0.028		-0.00812663	0.966806	0.979479	none
ENSG00000116985.9	1.34	1.04-1.71	0.022		1.13384	7.59411e-10	5.67341e-09	up
ENSG00000117090.13	0.8	0.64-0.99	0.037		0.128693	0.547578	0.665033	none
ENSG00000117152.12	1.18	1.01-1.39	0.042		0.60093	0.0238268	0.0486376	up
ENSG00000117222.12	1.82	1.04-3.19	0.035		0.563319	7.75994e-14	9.69049e-13	up
ENSG00000117281.14	0.62	0.41-0.93	0.023		-1.24727	5.53709e-11	4.8636e-10	down
ENSG00000117394.18	1.21	1.03-1.41	0.02		3.27319	1.6122e-37	2.10247e-35	up
ENSG00000117399.12	1.22	1.04-1.44	0.016		3.71079	4.71042e-51	2.14303e-48	up
ENSG00000117479.11	1.39	1-1.92	0.047		-0.159444	0.268876	0.383236	none
ENSG00000117593.9	1.53	1.12-2.07	0.007		1.17775	7.34488e-19	1.65846e-17	up
ENSG00000117643.13	0.76	0.62-0.93	0.008		-0.768516	1.4886e-05	5.87169e-05	down
ENSG00000117650.11	1.31	1.1-1.56	0.002		3.76127	8.12827e-54	4.93066e-51	up
ENSG00000117676.12	0.63	0.43-0.93	0.02		-0.51503	2.1453e-06	9.72039e-06	down
ENSG00000117682.15	0.54	0.31-0.94	0.03		0.418062	2.45745e-08	1.48665e-07	up
ENSG00000117724.11	1.3	1.1-1.53	0.002		3.33042	4.3478e-47	1.35991e-44	up
ENSG00000118193.10	1.32	1.11-1.55	0.001		3.61877	4.14527e-47	1.31619e-44	up
ENSG00000118194.17	1.2	1.02-1.41	0.032		-1.31627	4.65828e-06	1.99678e-05	down
ENSG00000118200.13	1.92	1.25-2.95	0.003		-0.011301	0.898658	0.935538	none
ENSG00000118690.11	0.64	0.43-0.97	0.034		-1.04598	7.92703e-13	8.75978e-12	down
ENSG00000118873.14	1.69	1.04-2.74	0.033		0.411056	1.13919e-07	6.2718e-07	up
ENSG00000119004.13	0.53	0.29-0.98	0.043		-0.310307	5.94612e-06	2.50905e-05	down
ENSG00000119042.15	1.33	1.05-1.67	0.018		1.17147	3.86866e-09	2.60926e-08	up
ENSG00000119147.8	0.8	0.68-0.95	0.011		-2.74098	1.34748e-13	1.6328e-12	down
ENSG00000119285.9	1.48	1.01-2.18	0.045		0.992696	1.21969e-20	3.27729e-19	up
ENSG00000119314.14	1.63	1.04-2.57	0.034		0.42891	2.09582e-06	9.51125e-06	up
ENSG00000119318.11	2.07	1.25-3.42	0.004		0.425585	1.10967e-06	5.24765e-06	up
ENSG00000119487.15	1.92	1.05-3.5	0.033		0.0571815	0.404215	0.528051	none
ENSG00000119574.11	1.91	1.14-3.19	0.014		-0.0365499	0.687008	0.780117	none
ENSG00000119614.2	0.33	0.16-0.69	0.003		-1.10721	0.0198293	0.0413654	down
ENSG00000119616.10	1.74	1.06-2.86	0.029		0.26518	0.00150197	0.00409959	up
ENSG00000119638.11	1.74	1.06-2.86	0.027		-0.15792	0.0526753	0.0970371	none
ENSG00000119689.13	1.7	1.13-2.57	0.012		0.194252	0.0319804	0.0629204	none
ENSG00000119729.9	0.65	0.43-0.97	0.035		-0.314954	0.00114171	0.00319758	down
ENSG00000119737.5	0.54	0.35-0.82	0.004		-0.395866	0.0116832	0.0259557	down
ENSG00000120210.6	1.31	1.07-1.6	0.009		-0.272629	0.556744	0.672941	none
ENSG00000120211.4	1.11	1.01-1.23	0.037		7.53526	3.85371e-16	6.36236e-15	up
ENSG00000120328.6	1.39	1.01-1.92	0.043		-0.435509	0.01096	0.024515	down
ENSG00000120436.3	0.52	0.3-0.89	0.017		0.639095	0.0717462	0.126902	none
ENSG00000120658.11	1.37	1.04-1.82	0.026		0.0367988	0.841929	0.895308	none
ENSG00000120686.10	0.55	0.33-0.94	0.029		-0.0998321	0.206145	0.308393	none
ENSG00000120784.14	0.69	0.49-0.96	0.028		0.440498	0.00113849	0.00318902	up
ENSG00000120896.12	0.72	0.53-0.99	0.044		-1.26932	1.04816e-23	3.85699e-22	down
ENSG00000120899.16	0.74	0.57-0.95	0.021		-0.832746	1.48659e-09	1.06661e-08	down
ENSG00000120915.12	0.79	0.64-0.96	0.021		-0.664372	0.00104299	0.00294251	down
ENSG00000120925.12	1.58	1.13-2.21	0.008		0.328763	0.00478765	0.0116806	up
ENSG00000120952.4	2.23	1.07-4.64	0.032		0.989164	0.612924	0.720464	none
ENSG00000121064.11	0.75	0.58-0.96	0.021		-0.181278	0.238919	0.34778	none
ENSG00000121104.6	0.62	0.44-0.88	0.007		-0.127275	0.333823	0.455333	none
ENSG00000121621.6	1.3	1.02-1.67	0.034		1.35668	4.06745e-14	5.25474e-13	up
ENSG00000121644.17	1.51	1.02-2.25	0.042		-0.00687049	0.942546	0.964637	none
ENSG00000121691.4	0.75	0.57-0.98	0.037		-1.79484	5.44614e-36	6.03994e-34	down
ENSG00000121807.5	0.81	0.68-0.97	0.022		-0.292356	0.192468	0.291648	none
ENSG00000121957.11	1.44	1.09-1.91	0.011		0.905837	2.577e-09	1.78068e-08	up
ENSG00000122140.9	1.61	1.07-2.42	0.024		0.550217	2.17234e-06	9.83734e-06	up
ENSG00000122584.11	1.26	1.04-1.53	0.017		4.38541	4.06195e-13	4.64907e-12	up
ENSG00000122592.7	1.34	1.01-1.78	0.041		-0.973316	0.000101973	0.000347959	down
ENSG00000122642.9	2.01	1.39-2.93	0		0.00479366	0.967305	0.979865	none
ENSG00000122643.17	1.5	1.08-2.07	0.014		0.641074	1.85994e-06	8.49956e-06	up
ENSG00000122687.16	1.52	1.02-2.27	0.041		0.667378	5.42507e-11	4.77253e-10	up
ENSG00000122691.11	1.18	1.02-1.36	0.027		2.50737	5.52742e-13	6.21967e-12	up
ENSG00000122756.13	0.71	0.53-0.95	0.021		-2.73522	2.45733e-13	2.88764e-12	down
ENSG00000122884.11	1.38	1.04-1.84	0.025		0.959669	1.63834e-11	1.54263e-10	up
ENSG00000122986.12	0.68	0.49-0.93	0.015		-1.20655	4.08455e-16	6.73514e-15	down
ENSG00000123165.8	2.49	1.07-5.77	0.033		0.20381	0.883764	0.924981	none
ENSG00000123485.10	1.24	1.06-1.46	0.008		3.67587	3.89095e-48	1.33144e-45	up
ENSG00000123570.3	0.66	0.48-0.91	0.012		-0.434642	0.0298789	0.0592899	none
ENSG00000123607.13	0.53	0.31-0.9	0.02		-0.379458	2.88958e-05	0.000108545	down
ENSG00000123610.4	1.2	1.01-1.43	0.044		0.602653	0.0100106	0.0226001	up
ENSG00000123612.14	0.77	0.6-0.99	0.04		0.380524	0.132723	0.214063	none
ENSG00000123684.11	1.46	1.06-2	0.019		1.10115	1.09916e-18	2.43128e-17	up
ENSG00000123838.9	0.9	0.83-0.99	0.024		-0.9054	0.0132003	0.028879	down
ENSG00000123908.10	1.41	1.03-1.93	0.032		0.121723	0.347559	0.470034	none
ENSG00000123983.12	1.35	1-1.81	0.047		0.289304	0.0218531	0.0450568	up
ENSG00000123999.4	1.12	1.02-1.23	0.018		5.09334	2.10145e-23	7.43889e-22	up
ENSG00000124092.11	1.17	1.02-1.35	0.024		-0.742323	0.122657	0.200208	none
ENSG00000124205.14	0.65	0.44-0.94	0.024		-3.12473	7.06108e-09	4.5818e-08	down
ENSG00000124215.15	0.83	0.72-0.96	0.013		-0.0398381	0.900091	0.936267	none
ENSG00000124225.14	1.3	1.05-1.61	0.017		0.734089	8.70188e-05	0.000300724	up
ENSG00000124243.16	0.7	0.53-0.91	0.009		0.934386	8.27178e-08	4.63627e-07	up
ENSG00000124313.11	0.68	0.47-0.99	0.047		-0.190687	0.108047	0.179775	none
ENSG00000124466.8	1.19	1.05-1.34	0.005		3.16858	2.68805e-21	7.73123e-20	up
ENSG00000124508.15	0.65	0.47-0.91	0.011		-0.392369	0.000557391	0.00165891	down
ENSG00000124713.5	0.71	0.53-0.95	0.02		-0.703244	0.00511491	0.0123817	down
ENSG00000124762.12	1.39	1.03-1.86	0.031		-0.79201	1.30166e-06	6.08871e-06	down
ENSG00000124785.7	0.79	0.65-0.96	0.015		-1.95434	1.09968e-15	1.72586e-14	down
ENSG00000124813.19	1.32	1.05-1.67	0.019		1.79058	4.37496e-27	2.17315e-25	up
ENSG00000125319.13	1.23	1-1.51	0.048		2.51276	3.30616e-36	3.79271e-34	up
ENSG00000125484.10	1.61	1.05-2.48	0.029		0.174899	0.06584	0.117882	none
ENSG00000125498.18	0.71	0.5-0.99	0.044		-1.88537	2.41352e-06	1.08436e-05	down
ENSG00000125637.14	0.64	0.44-0.93	0.021		0.191861	0.051205	0.0947253	none
ENSG00000125798.13	0.88	0.79-0.99	0.03		-0.532776	0.0745543	0.13103	none
ENSG00000125815.7	3.16	1.22-8.22	0.018		0.13669	0.969849	NA	none
ENSG00000125966.9	0.84	0.72-0.99	0.037		-0.343887	0.14254	0.227152	none
ENSG00000126773.11	1.79	1.13-2.81	0.012		-0.0882834	0.338973	0.460975	none
ENSG00000126777.16	1.47	1.03-2.09	0.035		-0.0623224	0.575359	0.689033	none
ENSG00000126787.11	1.32	1.11-1.58	0.002		3.77674	1.15726e-51	5.65027e-49	up
ENSG00000126814.6	1.57	1.02-2.44	0.042		0.704955	2.23174e-12	2.31958e-11	up
ENSG00000126821.7	1.43	1.11-1.86	0.006		0.194967	0.189529	0.287936	none
ENSG00000126822.14	1.28	1.01-1.61	0.04		0.48828	0.00487387	0.0118649	up
ENSG00000126838.8	0.82	0.68-0.99	0.04		-2.1813	5.65068e-09	3.71357e-08	down
ENSG00000126895.12	0.71	0.52-0.97	0.03		-2.34645	4.17735e-18	8.63866e-17	down
ENSG00000126947.10	0.73	0.57-0.94	0.014		-1.03002	9.8751e-11	8.38692e-10	down
ENSG00000127084.16	0.76	0.6-0.97	0.03		-1.35417	2.3327e-17	4.43246e-16	down
ENSG00000127191.16	1.38	1.01-1.88	0.043		0.754113	2.64426e-08	1.59316e-07	up
ENSG00000127241.15	0.8	0.65-0.99	0.041		-3.00453	9.43454e-28	4.95697e-26	down
ENSG00000127249.13	0.89	0.8-1	0.047		-1.57733	6.06683e-07	2.98907e-06	down
ENSG00000127515.1	87.74	1.65-4663.78	0.027		0.0168406	0.997245	NA	none
ENSG00000127564.15	1.28	1.05-1.55	0.014		2.64053	7.56682e-34	6.93239e-32	up
ENSG00000127578.6	1.26	1.02-1.56	0.034		-0.406248	0.126521	0.205671	none
ENSG00000127903.13	0.77	0.6-0.99	0.042		-0.959935	6.61876e-05	0.000234048	down
ENSG00000128000.14	0.6	0.41-0.89	0.01		-0.151466	0.200709	0.301863	none
ENSG00000128298.15	1.23	1.06-1.43	0.006		2.85152	2.2932e-20	6.02432e-19	up
ENSG00000128512.18	0.72	0.54-0.95	0.021		-1.64697	9.02989e-32	6.83404e-30	down
ENSG00000128578.8	1.18	1.03-1.34	0.014		2.22442	1.72234e-12	1.81442e-11	up
ENSG00000128709.11	1.27	1.06-1.53	0.01		-0.294857	0.419508	0.543449	none
ENSG00000128739.19	0.79	0.64-0.97	0.024		-0.334439	0.0385857	0.0741417	none
ENSG00000128849.10	0.8	0.65-0.97	0.026		-2.35057	1.18751e-33	1.06599e-31	down
ENSG00000128891.14	0.55	0.34-0.9	0.018		-0.084283	0.327791	0.448618	none
ENSG00000128918.13	0.86	0.76-0.98	0.024		-0.923186	0.0124831	0.027513	down
ENSG00000128928.7	0.68	0.51-0.91	0.01		-0.38018	0.00408194	0.0101148	down
ENSG00000129003.14	0.68	0.48-0.97	0.033		-0.341061	0.0022581	0.00593015	down
ENSG00000129474.14	1.36	1.07-1.74	0.013		-0.253052	0.142471	0.227077	none
ENSG00000129521.12	1.14	1.01-1.29	0.031		3.04534	2.91651e-23	1.02157e-21	up
ENSG00000129691.14	1.53	1.04-2.27	0.033		-0.0147042	0.910592	0.943563	none
ENSG00000129993.13	0.72	0.58-0.9	0.004		-1.55931	1.15101e-15	1.79866e-14	down
ENSG00000130045.14	1.37	1.04-1.8	0.023		-0.275438	0.382004	0.505985	none
ENSG00000130304.15	0.75	0.56-0.98	0.038		-0.412747	0.00253534	0.00657884	down
ENSG00000130385.5	0.35	0.13-0.92	0.033		-1.86887	0.000796406	0.00230017	down
ENSG00000130414.10	1.52	1.06-2.19	0.023		0.190348	0.113279	0.187167	none
ENSG00000130513.6	0.83	0.72-0.94	0.005		1.33632	4.146e-06	1.79177e-05	up
ENSG00000130517.12	0.51	0.35-0.74	0		-0.318164	0.00316034	0.00804626	down
ENSG00000130558.17	0.82	0.71-0.95	0.008		-0.96393	0.000520648	0.00155894	down
ENSG00000130635.14	1.17	1.01-1.35	0.038		1.99676	4.88771e-16	7.97736e-15	up
ENSG00000130726.10	1.72	1.14-2.58	0.009		0.395298	7.03101e-05	0.00024751	up
ENSG00000130751.8	1.32	1.01-1.73	0.041		0.145516	0.479809	0.601626	none
ENSG00000130821.14	1.2	1.02-1.4	0.029		1.7136	1.00827e-11	9.76232e-11	up
ENSG00000131059.10	3.23	1.25-8.39	0.016		0.368016	0.815495	NA	none
ENSG00000131094.3	1.41	1.12-1.76	0.003		1.58424	7.51387e-06	3.11446e-05	up
ENSG00000131187.8	1.32	1.07-1.62	0.01		2.68743	1.03775e-26	4.96384e-25	up
ENSG00000131264.3	9.77	1.25-76.49	0.03		-0.0881057	0.985587	NA	none
ENSG00000131400.6	0.91	0.84-0.99	0.025		-0.327319	0.281071	0.396664	none
ENSG00000131620.16	1.28	1.09-1.5	0.003		-0.423069	0.102716	0.17228	none
ENSG00000131746.11	1.12	1.02-1.24	0.019		3.50495	1.81895e-16	3.13084e-15	up
ENSG00000131747.13	1.18	1.01-1.38	0.04		3.88545	1.61182e-62	2.39003e-59	up
ENSG00000131791.7	1.54	1.1-2.15	0.013		0.261055	0.0312519	0.0616537	none
ENSG00000131808.9	1.71	1.02-2.86	0.041		-0.086041	0.985924	NA	none
ENSG00000131966.12	1.56	1.01-2.4	0.043		0.140811	0.0939735	0.15965	none
ENSG00000132122.10	0.73	0.58-0.91	0.006		-0.650653	2.88295e-05	0.000108337	down
ENSG00000132432.12	1.35	1.01-1.81	0.041		1.22234	7.02194e-18	1.41485e-16	up
ENSG00000132514.12	0.85	0.72-1	0.049		-0.752207	0.00299225	0.00765872	down
ENSG00000132541.9	1.44	1.03-2.02	0.033		0.87219	9.22073e-11	7.86453e-10	up
ENSG00000132681.15	0.58	0.36-0.94	0.026		0.034646	0.895734	0.933507	none
ENSG00000132879.12	0.72	0.54-0.95	0.02		0.209032	0.113286	0.18717	none
ENSG00000132932.15	0.77	0.65-0.92	0.003		-0.740866	0.0132179	0.0289144	down
ENSG00000132950.17	0.51	0.32-0.82	0.005		0.0737497	0.402915	0.526747	none
ENSG00000132970.11	0.8	0.65-0.97	0.026		-1.83535	2.91279e-19	6.85174e-18	down
ENSG00000133110.13	1.16	1-1.34	0.046		1.9423	6.82424e-15	9.65766e-14	up
ENSG00000133111.3	0.62	0.4-0.98	0.039		-0.46929	3.8241e-06	1.66216e-05	down
ENSG00000133134.10	0.85	0.74-0.99	0.033		0.0535742	0.843601	0.896571	none
ENSG00000133256.11	0.79	0.65-0.96	0.019		-0.298588	0.167106	0.25901	none
ENSG00000133302.11	1.28	1.01-1.63	0.04		0.798249	1.10336e-06	5.22089e-06	up
ENSG00000133422.11	1.93	1.22-3.04	0.005		0.716846	1.00441e-13	1.23731e-12	up
ENSG00000133466.12	1.34	1.09-1.65	0.005		2.07386	2.172e-26	1.01468e-24	up
ENSG00000133661.14	0.9	0.82-0.97	0.01		-2.59468	3.20817e-11	2.90923e-10	down
ENSG00000134001.11	1.67	1.1-2.54	0.017		0.394233	3.0588e-05	0.000114408	up
ENSG00000134013.14	1.23	1.05-1.43	0.009		1.72936	1.52802e-12	1.62399e-11	up
ENSG00000134057.13	1.28	1.06-1.55	0.01		3.05166	8.58853e-46	2.35514e-43	up
ENSG00000134160.12	0.51	0.26-0.97	0.041		-3.1603	1.44662e-13	1.74712e-12	down
ENSG00000134247.9	1.35	1.02-1.78	0.035		1.3328	1.69887e-17	3.28105e-16	up
ENSG00000134333.12	1.38	1.05-1.83	0.022		1.57907	2.17184e-29	1.34185e-27	up
ENSG00000134343.11	1.19	1.02-1.39	0.025		0.0599368	0.859981	0.908406	none
ENSG00000134363.10	1.18	1.03-1.34	0.013		0.302611	0.380129	0.504236	none
ENSG00000134690.9	1.24	1.01-1.51	0.039		2.92977	7.90735e-45	2.04244e-42	up
ENSG00000134757.4	1.12	1-1.26	0.043		0.79696	0.11692	0.192223	none
ENSG00000134765.8	1.74	1.08-2.81	0.024		0.652087	0.0805945	0.140077	none
ENSG00000134852.13	1.85	1.18-2.88	0.007		0.121068	0.203355	0.304915	none
ENSG00000134917.9	0.85	0.73-0.99	0.035		-3.93489	6.51191e-36	7.16238e-34	down
ENSG00000135045.6	1.36	1-1.85	0.047		0.663505	6.24954e-06	2.62629e-05	up
ENSG00000135063.16	0.81	0.69-0.96	0.015		-3.13413	3.17668e-36	3.66517e-34	down
ENSG00000135124.13	0.66	0.45-0.97	0.035		0.148328	0.183704	0.280503	none
ENSG00000135148.10	0.58	0.35-0.96	0.033		0.132145	0.143741	0.228756	none
ENSG00000135185.10	0.75	0.57-0.99	0.041		-0.890477	3.53015e-07	1.80295e-06	down
ENSG00000135346.7	1.13	1.04-1.22	0.003		1.66803	0.0184663	0.0388461	up
ENSG00000135374.8	0.83	0.73-0.93	0.002		-0.766446	0.0421085	0.0800438	none
ENSG00000135443.7	1.83	1.18-2.84	0.007		-0.136937	0.761022	0.837317	none
ENSG00000135469.12	0.61	0.4-0.93	0.021		-0.17102	0.118657	0.194726	none
ENSG00000135472.7	0.85	0.74-0.98	0.023		0.262548	0.460891	0.583547	none
ENSG00000135476.10	1.21	1.03-1.43	0.024		2.70839	1.60409e-29	1.00503e-27	up
ENSG00000135763.8	1.56	1.04-2.32	0.03		0.77469	1.82219e-11	1.70412e-10	up
ENSG00000135862.5	1.38	1.04-1.82	0.024		0.384521	0.00540388	0.0130018	up
ENSG00000135929.7	0.72	0.59-0.88	0.002		-1.80765	1.1363e-18	2.51065e-17	down
ENSG00000136002.15	1.15	1-1.31	0.046		-0.953018	0.00177908	0.00478293	down
ENSG00000136014.10	0.81	0.67-0.97	0.025		-0.893646	0.000292171	0.00091845	down
ENSG00000136048.12	0.77	0.64-0.94	0.008		-0.811214	0.000226396	0.000726164	down
ENSG00000136144.10	0.53	0.34-0.81	0.004		-0.215219	0.0236116	0.0482549	down
ENSG00000136147.15	0.63	0.43-0.93	0.02		-0.24124	0.0100906	0.0227623	down
ENSG00000136152.13	0.51	0.3-0.85	0.01		0.178523	0.0326329	0.0640845	none
ENSG00000136161.11	0.62	0.45-0.84	0.002		-0.631624	9.47306e-07	4.53231e-06	down
ENSG00000136169.15	0.49	0.32-0.76	0.001		-0.404258	2.28541e-05	8.73328e-05	down
ENSG00000136270.12	1.46	1.01-2.12	0.046		1.06205	7.49852e-20	1.87749e-18	up
ENSG00000136271.9	1.64	1.05-2.56	0.028		0.860665	4.34414e-20	1.10708e-18	up
ENSG00000136280.14	1.46	1.03-2.06	0.034		0.64367	7.5133e-07	3.64653e-06	up
ENSG00000136492.7	1.24	1.01-1.53	0.042		2.23283	9.79942e-28	5.14193e-26	up
ENSG00000136518.15	1.44	1-2.06	0.048		1.03368	4.0748e-19	9.42452e-18	up
ENSG00000136603.12	1.56	1.05-2.32	0.027		-0.0147308	0.89066	0.93018	none
ENSG00000136643.10	1.56	1-2.44	0.049		0.567574	6.15227e-10	4.66148e-09	up
ENSG00000136802.10	1.55	1.14-2.1	0.005		-0.18334	0.162067	0.252609	none
ENSG00000136824.17	1.43	1.04-1.95	0.027		0.525086	6.56042e-05	0.000232149	up
ENSG00000136842.12	0.79	0.64-0.98	0.033		-1.74762	2.47078e-16	4.19153e-15	down
ENSG00000136875.11	1.74	1.04-2.9	0.034		0.550908	2.07452e-09	1.45532e-08	up
ENSG00000136929.11	0.52	0.29-0.96	0.036		-2.35819	1.48855e-15	2.29214e-14	down
ENSG00000136931.8	1.53	1.19-1.96	0.001		1.90811	0.000212705	0.000685658	up
ENSG00000136943.9	1.16	1.02-1.32	0.021		1.34767	1.36897e-05	5.43353e-05	up
ENSG00000136950.12	1.61	1.03-2.52	0.037		0.508974	4.37285e-07	2.20147e-06	up
ENSG00000137033.10	0.79	0.67-0.93	0.005		-2.3814	1.55272e-21	4.56087e-20	down
ENSG00000137135.16	1.33	1.05-1.67	0.016		2.05238	1.22967e-30	8.53226e-29	up
ENSG00000137203.9	1.16	1.03-1.31	0.018		3.50887	1.97118e-31	1.46416e-29	up
ENSG00000137440.4	1.13	1.02-1.26	0.019		0.375622	0.333659	0.45514	none
ENSG00000137449.14	1.49	1.08-2.05	0.015		-0.425878	0.00163535	0.00442923	down
ENSG00000137462.6	0.82	0.69-0.96	0.017		-0.462867	0.0263446	0.0531272	none
ENSG00000137478.13	0.63	0.41-0.98	0.042		-0.494432	1.82491e-07	9.75591e-07	down
ENSG00000137804.11	1.22	1-1.49	0.045		2.54556	4.95067e-37	6.13638e-35	up
ENSG00000137807.12	1.21	1.02-1.45	0.029		2.46948	2.79634e-28	1.53362e-26	up
ENSG00000137809.15	1.15	1.01-1.3	0.039		3.15833	7.15523e-28	3.78925e-26	up
ENSG00000137812.18	1.28	1.05-1.56	0.013		2.50674	5.54083e-32	4.33267e-30	up
ENSG00000137824.14	0.53	0.31-0.88	0.015		-1.02748	5.78649e-28	3.09716e-26	down
ENSG00000138028.13	1.15	1.01-1.32	0.038		3.72205	5.37667e-28	2.88167e-26	up
ENSG00000138036.17	0.6	0.38-0.94	0.027		-0.431971	1.27834e-05	5.10215e-05	down
ENSG00000138115.12	0.66	0.49-0.9	0.008		-0.602691	0.0426095	0.0808797	none
ENSG00000138160.5	1.26	1.03-1.56	0.026		2.64038	6.00179e-41	1.06322e-38	up
ENSG00000138180.14	1.24	1.04-1.48	0.019		3.20446	1.03575e-43	2.45368e-41	up
ENSG00000138182.13	1.35	1.04-1.75	0.025		1.24707	2.56163e-15	3.82249e-14	up
ENSG00000138613.12	0.71	0.53-0.96	0.028		-0.968421	6.29907e-12	6.22229e-11	down
ENSG00000138617.13	0.6	0.39-0.93	0.022		0.15721	0.0786931	0.137213	none
ENSG00000138622.3	0.81	0.67-0.97	0.026		0.816153	0.0779539	0.136114	none
ENSG00000138670.15	0.72	0.53-0.97	0.031		-1.45264	8.4001e-22	2.54392e-20	down
ENSG00000138675.15	1.54	1.26-1.88	0		3.57919	9.9374e-10	7.3149e-09	up
ENSG00000138778.10	1.27	1.05-1.54	0.014		2.29307	5.13256e-25	2.11407e-23	up
ENSG00000138792.8	1.27	1.01-1.59	0.042		-0.550087	0.00651681	0.0153846	down
ENSG00000138801.7	0.53	0.32-0.87	0.012		-0.862855	3.83054e-25	1.59583e-23	down
ENSG00000139350.10	1.61	1.04-2.49	0.034		0.230144	0.015629	0.0335796	up
ENSG00000139438.5	1.27	1.03-1.57	0.027		0.0150648	0.952172	0.970424	none
ENSG00000139508.13	0.78	0.62-0.98	0.036		-0.0426068	0.809796	0.872587	none
ENSG00000139531.11	0.57	0.36-0.89	0.013		0.191968	0.061793	0.111509	none
ENSG00000139597.15	0.72	0.56-0.94	0.015		-1.21559	1.84873e-14	2.48793e-13	down
ENSG00000139734.16	1.27	1.03-1.56	0.028		0.254547	0.207491	0.310005	none
ENSG00000139800.8	1.2	1.01-1.42	0.041		4.87974	9.0987e-11	7.76873e-10	up
ENSG00000139880.18	1.27	1.05-1.55	0.016		1.36959	1.8103e-11	1.69379e-10	up
ENSG00000139926.14	1.2	1-1.43	0.047		0.890542	5.50758e-05	0.0001976	up
ENSG00000139977.12	1.65	1.21-2.26	0.002		0.290005	0.0142693	0.0309842	up
ENSG00000139985.6	1.42	1.06-1.89	0.018		0.952183	0.00293816	0.00753472	up
ENSG00000140090.16	0.73	0.54-0.97	0.029		-2.2021	1.67982e-19	4.04167e-18	down
ENSG00000140557.10	1.27	1.05-1.54	0.013		3.09827	6.03614e-13	6.75414e-12	up
ENSG00000140564.9	1.22	1.03-1.44	0.019		0.670528	0.00269306	0.00695296	up
ENSG00000141040.13	0.69	0.51-0.94	0.018		0.0276701	0.848493	0.900232	none
ENSG00000141161.10	0.65	0.43-0.97	0.035		-2.61254	3.37471e-26	1.54059e-24	down
ENSG00000141255.11	1.87	1.2-2.9	0.005		-1.21832	0.0170885	0.0362755	down
ENSG00000141449.13	1.19	1.05-1.36	0.009		2.98405	8.63665e-18	1.72252e-16	up
ENSG00000141497.12	0.73	0.57-0.94	0.013		-1.56335	1.99599e-22	6.44446e-21	down
ENSG00000141504.10	0.69	0.48-0.98	0.04		-0.696218	1.03053e-08	6.53132e-08	down
ENSG00000141526.13	1.31	1.05-1.64	0.017		1.26009	8.9063e-11	7.61744e-10	up
ENSG00000141560.13	1.71	1.08-2.71	0.021		0.414533	2.59906e-05	9.85193e-05	up
ENSG00000141946.1	3.57	1.03-12.36	0.045		0.143594	0.847703	NA	none
ENSG00000142621.18	0.83	0.7-0.99	0.038		-1.48733	6.00718e-10	4.55672e-09	down
ENSG00000142698.13	1.55	1.16-2.08	0.003		0.854244	0.225947	0.332337	none
ENSG00000142748.11	0.86	0.74-1	0.049		-4.69657	3.78722e-50	1.54719e-47	down
ENSG00000142789.18	0.22	0.06-0.75	0.015		1.08264	0.287555	0.404275	none
ENSG00000142945.11	1.2	1.01-1.41	0.033		3.43757	3.56642e-46	1.00553e-43	up
ENSG00000142973.11	0.88	0.81-0.96	0.005		-3.01652	1.97883e-14	2.65462e-13	down
ENSG00000143067.4	1.39	1.06-1.82	0.016		0.0736558	0.621825	0.727466	none
ENSG00000143171.11	0.83	0.68-1	0.048		-2.78043	2.3722e-12	2.45982e-11	down
ENSG00000143185.3	0.69	0.5-0.95	0.024		-0.285085	0.289349	0.406313	none
ENSG00000143228.11	1.21	1.02-1.42	0.024		3.57101	1.39488e-46	4.0763e-44	up
ENSG00000143322.18	1.91	1.26-2.91	0.002		0.1351	0.203245	0.304829	none
ENSG00000143344.14	0.78	0.63-0.98	0.032		-0.429133	0.00555878	0.0133318	down
ENSG00000143367.14	1.45	1.09-1.92	0.01		0.55832	0.000104583	0.000356288	up
ENSG00000143390.16	0.58	0.36-0.95	0.029		0.273392	0.00446738	0.0109714	up
ENSG00000143416.19	0.84	0.72-0.98	0.027		-1.32407	1.21736e-07	6.67209e-07	down
ENSG00000143476.16	1.39	1.11-1.75	0.005		1.73123	1.00709e-18	2.24e-17	up
ENSG00000143493.11	1.69	1.13-2.54	0.011		0.910966	3.08675e-18	6.4804e-17	up
ENSG00000143590.12	1.26	1.02-1.56	0.032		2.94704	5.23866e-43	1.16519e-40	up
ENSG00000143632.13	1.42	1.05-1.91	0.021		-0.523009	0.0307986	0.0608585	none
ENSG00000143633.11	1.62	1.03-2.56	0.037		1.04451	1.29859e-28	7.4378e-27	up
ENSG00000143641.9	1.81	1.28-2.55	0.001		0.903563	2.81918e-14	3.70668e-13	up
ENSG00000143653.9	1.43	1.08-1.9	0.014		0.557579	0.000102485	0.000349616	up
ENSG00000143891.15	0.75	0.58-0.98	0.036		0.420571	0.00244597	0.00636964	up
ENSG00000143951.14	0.5	0.29-0.86	0.012		-0.252609	0.003855	0.00960835	down
ENSG00000144040.11	0.65	0.44-0.98	0.04		0.222599	0.0403269	0.0770602	none
ENSG00000144061.11	0.74	0.55-1	0.047		-0.678704	6.60358e-06	2.76491e-05	down
ENSG00000144285.14	0.86	0.75-1	0.045		-2.35727	1.58276e-10	1.30359e-09	down
ENSG00000144476.5	1.19	1-1.42	0.047		-0.392039	0.0909609	0.155164	none
ENSG00000144645.12	1.54	1.1-2.15	0.011		0.409034	0.00186778	0.00499688	up
ENSG00000144749.12	0.76	0.59-0.97	0.026		-0.379878	0.0120195	0.0266186	down
ENSG00000145022.4	0.7	0.51-0.95	0.024		-0.331482	0.0135701	0.0296088	down
ENSG00000145088.7	0.6	0.42-0.85	0.004		0.404904	0.00328291	0.00832022	up
ENSG00000145192.11	1.42	1.04-1.92	0.025		2.75136	1.97217e-05	7.61261e-05	up
ENSG00000145241.9	0.48	0.27-0.83	0.009		-0.259431	0.000956474	0.00272163	down
ENSG00000145335.14	0.76	0.58-0.98	0.038		-1.57754	1.68044e-15	2.5726e-14	down
ENSG00000145375.7	1.52	1.03-2.25	0.033		-0.10077	0.335388	0.457048	none
ENSG00000145386.8	1.26	1.05-1.51	0.015		2.82027	5.75702e-37	7.09194e-35	up
ENSG00000145428.13	0.73	0.58-0.93	0.012		-0.756583	0.000318537	0.000993451	down
ENSG00000145681.9	1.16	1.01-1.33	0.039		0.481834	0.228628	0.33562	none
ENSG00000145708.9	0.6	0.37-0.95	0.031		-1.44242	1.5863e-09	1.13267e-08	down
ENSG00000146054.16	1.23	1.05-1.44	0.01		0.425109	0.162301	0.252922	none
ENSG00000146574.14	1.46	1.01-2.11	0.044		0.847894	4.75949e-12	4.77213e-11	up
ENSG00000146670.8	1.28	1.06-1.56	0.011		2.76072	8.38785e-35	8.35363e-33	up
ENSG00000146676.6	1.69	1.09-2.61	0.018		0.174204	0.0808683	0.140492	none
ENSG00000146678.8	1.3	1.13-1.51	0		1.28018	0.00860864	0.0197658	up
ENSG00000146701.10	1.64	1.11-2.42	0.013		0.801151	5.87983e-14	7.45188e-13	up
ENSG00000146731.9	1.45	1.14-1.85	0.002		1.39534	1.11524e-19	2.73253e-18	up
ENSG00000147117.7	0.56	0.37-0.87	0.009		-0.522136	0.0967329	0.163596	none
ENSG00000147121.14	0.6	0.37-0.97	0.037		-0.152287	0.0820244	0.142192	none
ENSG00000147262.3	3	1-8.96	0.049		0.390883	0.806271	0.870218	none
ENSG00000147432.5	0.44	0.22-0.9	0.024		1.06734	0.0470983	0.088204	none
ENSG00000147485.11	1.3	1.02-1.66	0.033		0.188269	0.425882	0.549541	none
ENSG00000147509.12	1.21	1.03-1.43	0.022		2.22669	2.2315e-11	2.06329e-10	up
ENSG00000147536.10	1.31	1.04-1.65	0.02		2.24079	1.31895e-24	5.22826e-23	up
ENSG00000147606.7	1.43	1.12-1.84	0.005		-0.457743	0.112773	0.186485	none
ENSG00000147677.9	1.49	1.04-2.15	0.031		0.609624	6.44977e-09	4.20695e-08	up
ENSG00000147689.15	1.2	1.06-1.36	0.004		6.88885	1.23362e-96	1.64631e-92	up
ENSG00000147894.13	0.71	0.51-1	0.047		-0.77072	1.24258e-09	8.9993e-09	down
ENSG00000148053.14	0.84	0.71-0.99	0.042		-2.63961	2.19624e-13	2.59607e-12	down
ENSG00000148082.8	0.81	0.69-0.96	0.013		-1.69338	3.44786e-12	3.51064e-11	down
ENSG00000148123.13	0.86	0.76-0.98	0.024		-0.666085	0.0694175	0.1235	none
ENSG00000148300.10	2.6	1.42-4.78	0.002		0.320975	4.99949e-05	0.000180584	up
ENSG00000148655.13	0.64	0.49-0.85	0.002		-0.734297	2.18579e-06	9.89375e-06	down
ENSG00000148702.13	0.89	0.81-0.98	0.018		2.16631	5.51347e-08	3.17015e-07	up
ENSG00000148704.11	1.33	1.04-1.69	0.021		6.2358	6.27096e-09	4.09767e-08	up
ENSG00000148773.11	1.25	1.06-1.48	0.01		2.94475	2.52684e-35	2.64137e-33	up
ENSG00000148795.5	0.67	0.48-0.93	0.017		-2.58614	1.17722e-21	3.50939e-20	down
ENSG00000148814.16	0.66	0.44-0.97	0.034		-0.203677	0.0719749	0.127189	none
ENSG00000148848.13	1.15	1.01-1.31	0.031		3.18025	1.24875e-28	7.18318e-27	up
ENSG00000149292.15	0.73	0.53-0.99	0.046		-0.29888	0.0268786	0.0540433	none
ENSG00000149300.8	0.57	0.35-0.92	0.02		-0.289438	0.198807	0.299456	none
ENSG00000149507.5	14.25	1.33-153.26	0.028		-0.0307717	0.994966	NA	none
ENSG00000149554.11	1.27	1.02-1.57	0.031		2.08753	2.70757e-27	1.36696e-25	up
ENSG00000149948.12	1.09	1-1.19	0.042		5.77367	2.40506e-28	1.33549e-26	up
ENSG00000150093.17	1.4	1.07-1.81	0.012		0.244782	0.0892002	0.152564	none
ENSG00000150361.10	2.97	1.17-7.53	0.022		0.71872	0.759591	0.836363	none
ENSG00000150540.12	0.78	0.62-1	0.046		-0.0207287	0.894861	0.933005	none
ENSG00000150630.3	1.25	1.06-1.49	0.01		-0.706961	0.00324197	0.00823261	down
ENSG00000150637.7	0.76	0.6-0.95	0.018		-0.512303	0.0107286	0.0240472	down
ENSG00000150773.9	0.74	0.55-0.99	0.046		-0.795526	2.19647e-05	8.41671e-05	down
ENSG00000150977.10	0.69	0.51-0.93	0.015		-1.33998	3.38998e-26	1.5458e-24	down
ENSG00000151364.14	0.84	0.72-0.99	0.043		0.113317	0.639266	0.742124	none
ENSG00000151388.9	1.16	1-1.35	0.045		2.0076	1.50163e-16	2.61501e-15	up
ENSG00000151413.15	1.52	1.05-2.2	0.025		0.526897	2.50556e-05	9.52547e-05	up
ENSG00000151498.10	0.73	0.57-0.94	0.015		1.12163	1.65723e-09	1.18017e-08	up
ENSG00000151500.13	0.61	0.41-0.91	0.014		0.440171	7.10543e-05	0.000249779	up
ENSG00000151846.8	1.36	1.04-1.78	0.024		1.25581	1.06535e-09	7.80039e-09	up
ENSG00000152104.10	1.46	1.1-1.93	0.009		-0.725987	7.2574e-08	4.1016e-07	down
ENSG00000152128.13	0.87	0.76-0.99	0.029		0.0404576	0.882684	0.924185	none
ENSG00000152133.13	0.61	0.37-0.99	0.046		-0.478519	2.07494e-07	1.1003e-06	down
ENSG00000152213.3	0.76	0.6-0.96	0.021		-0.854527	3.42802e-06	1.50339e-05	down
ENSG00000152377.11	1.16	1.04-1.29	0.006		3.35053	9.69284e-20	2.38808e-18	up
ENSG00000152465.16	1.52	1-2.29	0.048		-0.40675	0.000110013	0.00037323	down
ENSG00000153044.8	1.46	1.09-1.96	0.011		1.38761	2.4962e-18	5.30457e-17	up
ENSG00000153093.17	0.83	0.71-0.98	0.031		-2.04452	1.10973e-12	1.20404e-11	down
ENSG00000153187.15	1.82	1.01-3.3	0.047		0.323737	1.5998e-06	7.39262e-06	up
ENSG00000153207.13	1.83	1.19-2.81	0.006		0.499756	9.90505e-08	5.50012e-07	up
ENSG00000153233.11	1.2	1.02-1.4	0.029		-0.223793	0.493171	0.614522	none
ENSG00000154217.13	1.22	1.01-1.48	0.042		0.714634	0.000538821	0.00160867	up
ENSG00000154342.5	0.8	0.64-0.98	0.034		-4.74421	6.77066e-39	1.01146e-36	down
ENSG00000154429.9	1.57	1.02-2.44	0.042		-0.00457179	0.964754	0.978408	none
ENSG00000154473.16	1.63	1.03-2.58	0.038		0.764175	1.91995e-17	3.67785e-16	up
ENSG00000154479.11	0.78	0.61-1	0.047		-2.2221	1.1718e-16	2.06125e-15	down
ENSG00000154620.5	0.8	0.67-0.96	0.015		0.46185	0.385142	0.509216	none
ENSG00000154736.5	1.19	1-1.41	0.045		0.286558	0.250518	0.361705	none
ENSG00000154839.8	1.22	1.02-1.46	0.029		2.89777	1.24631e-30	8.63273e-29	up
ENSG00000155034.17	1.4	1.03-1.89	0.03		0.630452	2.87108e-05	0.000107941	up
ENSG00000155052.14	1.52	1.12-2.06	0.008		2.38197	0.0101109	0.022803	up
ENSG00000155085.14	0.72	0.53-0.99	0.046		-0.311143	0.0318644	0.0627323	none
ENSG00000155093.16	0.85	0.75-0.98	0.023		-0.632763	0.0322816	0.0634568	none
ENSG00000155100.9	1.46	1.06-2.03	0.022		0.367304	0.00442947	0.0108883	up
ENSG00000155269.10	1.31	1.08-1.58	0.006		2.10337	1.99724e-07	1.0619e-06	up
ENSG00000155330.8	1.52	1.02-2.26	0.042		0.783073	1.26135e-13	1.53493e-12	up
ENSG00000155368.15	0.69	0.49-0.97	0.034		-0.592383	5.04861e-07	2.51933e-06	down
ENSG00000155511.16	0.75	0.62-0.91	0.003		-4.35135	1.27012e-28	7.2852e-27	down
ENSG00000155858.5	1.61	1.07-2.43	0.022		0.216521	0.0361941	0.0701523	none
ENSG00000155886.10	1.24	1.05-1.46	0.01		5.47609	2.49361e-39	3.89977e-37	up
ENSG00000155890.3	7.33	1.27-42.26	0.026		0.0905111	0.985193	NA	none
ENSG00000155918.6	1.3	1.03-1.65	0.027		3.73192	8.48303e-09	5.44431e-08	up
ENSG00000155961.4	0.76	0.59-0.98	0.033		-0.237378	0.329171	0.4502	none
ENSG00000156298.11	0.82	0.71-0.96	0.011		-1.68496	1.43259e-08	8.94215e-08	down
ENSG00000156381.7	1.33	1.03-1.71	0.029		-0.170979	0.297064	0.414832	none
ENSG00000156471.11	1.7	1.09-2.65	0.02		0.248772	0.0127776	0.0280694	up
ENSG00000156500.13	0.58	0.34-0.98	0.041		0.0586232	0.586033	0.698058	none
ENSG00000156535.12	1.29	1.11-1.49	0.001		0.187752	0.490946	0.612264	none
ENSG00000156787.15	1.44	1.06-1.95	0.021		0.755329	7.43498e-07	3.6129e-06	up
ENSG00000156802.11	1.3	1.04-1.62	0.019		1.79663	1.98224e-23	7.04273e-22	up
ENSG00000157110.14	0.77	0.61-0.97	0.028		-0.497928	0.0043971	0.0108161	down
ENSG00000157227.11	1.32	1.07-1.63	0.01		1.17173	1.27297e-10	1.0642e-09	up
ENSG00000157303.9	0.78	0.62-0.99	0.041		0.253546	0.141491	0.225785	none
ENSG00000157349.14	0.57	0.36-0.92	0.02		-0.0238177	0.795631	0.862735	none
ENSG00000157456.6	1.21	1.02-1.44	0.033		3.0214	8.87901e-40	1.45094e-37	up
ENSG00000157551.16	0.88	0.78-0.99	0.033		-1.29887	5.69744e-05	0.000203881	down
ENSG00000157765.10	0.86	0.76-0.97	0.013		-0.553549	0.0309134	0.0610612	none
ENSG00000157978.10	0.7	0.5-1	0.048		-0.144154	0.205697	0.307779	none
ENSG00000158008.8	1.44	1.12-1.84	0.004		0.7443	0.00291045	0.00746941	up
ENSG00000158292.6	1.43	1.14-1.79	0.002		-0.266204	0.154851	0.243351	none
ENSG00000158402.17	1.33	1.09-1.63	0.005		3.72344	1.74327e-54	1.14416e-51	up
ENSG00000158473.6	0.78	0.62-0.99	0.045		-0.247879	0.174718	0.268914	none
ENSG00000158669.10	1.42	1.01-1.99	0.043		0.340801	0.00897576	0.0205077	up
ENSG00000158856.16	0.81	0.66-0.99	0.042		-0.761698	5.11745e-05	0.000184529	down
ENSG00000158901.10	0.39	0.18-0.87	0.022		1.11504	0.0970691	0.164103	none
ENSG00000159023.17	0.65	0.46-0.93	0.018		0.219403	0.0380211	0.073217	none
ENSG00000159182.4	1.49	1.1-2.03	0.01		-0.357582	0.866237	NA	none
ENSG00000159217.8	1.09	1.01-1.19	0.037		5.37996	2.88242e-19	6.78429e-18	up
ENSG00000159307.17	0.81	0.68-0.97	0.021		-4.0599	3.16494e-44	7.77371e-42	down
ENSG00000159374.16	0.72	0.53-1	0.048		-1.57688	4.24176e-09	2.84556e-08	down
ENSG00000159387.7	0.87	0.77-0.99	0.035		-0.610016	0.148172	0.234679	none
ENSG00000159708.16	0.83	0.7-0.98	0.03		-3.43546	2.88307e-24	1.11308e-22	down
ENSG00000159720.10	0.69	0.48-0.98	0.037		-0.459032	2.5126e-05	9.54836e-05	down
ENSG00000159763.3	0.86	0.75-1	0.043		0.128233	0.803136	0.868122	none
ENSG00000160111.11	0.86	0.75-0.98	0.022		-1.60745	1.25513e-07	6.86387e-07	down
ENSG00000160161.8	1.15	1.01-1.32	0.038		3.90717	2.99236e-37	3.82755e-35	up
ENSG00000160185.12	0.76	0.6-0.96	0.023		0.0917261	0.678515	0.773734	none
ENSG00000160193.10	1.63	1.11-2.37	0.012		0.818535	3.2156e-12	3.28838e-11	up
ENSG00000160199.13	2.42	1.22-4.8	0.011		0.0547815	0.372017	0.495874	none
ENSG00000160202.6	10.86	1.78-66.36	0.01		-0.201626	0.919649	NA	none
ENSG00000160207.7	1.64	1.21-2.23	0.002		2.17121	7.41211e-22	2.25153e-20	up
ENSG00000160208.12	1.58	1.09-2.31	0.017		0.509018	3.82045e-07	1.94204e-06	up
ENSG00000160219.10	0.77	0.6-0.98	0.031		-1.11769	7.66505e-11	6.6153e-10	down
ENSG00000160229.10	0.68	0.51-0.91	0.009		0.578401	0.00891966	0.0203956	up
ENSG00000160256.11	1.54	1.08-2.19	0.017		0.587464	7.16766e-07	3.49232e-06	up
ENSG00000160471.11	1.22	1.01-1.47	0.035		2.93436	4.58145e-15	6.60983e-14	up
ENSG00000160691.17	1.59	1.12-2.26	0.01		0.816169	7.75652e-14	9.68923e-13	up
ENSG00000160753.14	1.52	1.09-2.12	0.013		0.99194	5.50715e-16	8.92422e-15	up
ENSG00000160767.19	1.74	1.17-2.58	0.007		0.663335	2.48562e-09	1.7214e-08	up
ENSG00000160908.14	0.47	0.24-0.92	0.027		-0.127438	0.0547118	0.100259	none
ENSG00000161055.3	0.9	0.84-0.97	0.003		-0.446024	0.396215	0.52023	none
ENSG00000161203.12	1.9	1.14-3.16	0.014		0.0274802	0.746729	0.826886	none
ENSG00000161640.14	0.75	0.58-0.96	0.025		-2.57306	5.97875e-23	2.02286e-21	down
ENSG00000161714.10	1.27	1.04-1.55	0.019		-0.731353	0.000450529	0.00136727	down
ENSG00000161800.11	1.31	1.03-1.65	0.025		1.50805	2.24291e-18	4.7943e-17	up
ENSG00000161955.15	0.77	0.61-0.97	0.024		-1.11772	8.37276e-15	1.17043e-13	down
ENSG00000162006.8	1.16	1.02-1.31	0.025		1.32801	0.0025892	0.00670698	up
ENSG00000162104.8	0.79	0.63-0.98	0.035		-1.09155	1.65405e-09	1.17811e-08	down
ENSG00000162373.11	0.75	0.6-0.93	0.009		-0.348706	0.122231	0.199569	none
ENSG00000162571.12	0.8	0.65-0.99	0.042		-2.38665	3.42662e-13	3.95925e-12	down
ENSG00000162576.15	1.22	1-1.48	0.044		0.842599	7.77423e-05	0.000271029	up
ENSG00000162594.13	0.61	0.38-0.99	0.045		0.0795252	0.780273	0.851779	none
ENSG00000162702.7	1.62	1.16-2.28	0.005		0.986618	6.47971e-17	1.17173e-15	up
ENSG00000162775.13	2.64	1.44-4.84	0.002		0.198517	0.00872923	0.0200082	up
ENSG00000162777.15	0.64	0.42-0.98	0.04		0.133542	0.174602	0.268799	none
ENSG00000162949.15	0.87	0.78-0.96	0.009		1.23424	0.00012446	0.000418518	up
ENSG00000163053.9	1.14	1.02-1.27	0.019		2.77892	1.05266e-15	1.65337e-14	up
ENSG00000163060.7	0.71	0.54-0.93	0.013		-2.41775	1.13546e-10	9.56231e-10	down
ENSG00000163064.6	1.35	1.09-1.68	0.005		1.47748	0.0070315	0.0164734	up
ENSG00000163071.9	0.85	0.74-0.98	0.026		-1.55628	3.52838e-07	1.80227e-06	down
ENSG00000163132.6	1.34	1.01-1.78	0.041		-1.67318	1.91664e-17	3.67328e-16	down
ENSG00000163209.13	1.13	1.02-1.25	0.024		2.66771	0.000185892	0.000605269	up
ENSG00000163380.14	0.52	0.32-0.85	0.01		-1.60245	2.74716e-18	5.80397e-17	down
ENSG00000163406.9	0.77	0.65-0.92	0.003		-1.55712	1.14443e-11	1.10061e-10	down
ENSG00000163468.13	1.55	1.09-2.2	0.014		1.41551	6.85287e-34	6.2927e-32	up
ENSG00000163534.13	0.83	0.7-0.99	0.043		-0.431328	0.196264	0.296212	none
ENSG00000163577.6	1.33	1.02-1.75	0.037		0.334596	0.0530501	0.0976288	none
ENSG00000163596.15	0.73	0.54-0.99	0.042		-0.966906	2.10947e-09	1.47829e-08	down
ENSG00000163606.9	0.68	0.52-0.89	0.005		0.192138	0.324009	0.444491	none
ENSG00000163645.13	0.42	0.21-0.83	0.012		-0.135958	0.543084	0.660939	none
ENSG00000163655.14	1.55	1.06-2.28	0.023		0.642489	1.64169e-08	1.01634e-07	up
ENSG00000163673.6	1.52	1.06-2.19	0.023		0.459968	0.0643527	0.115556	none
ENSG00000163686.12	0.7	0.49-0.99	0.044		-1.28867	2.75145e-27	1.38737e-25	down
ENSG00000163687.12	0.79	0.65-0.95	0.014		-3.74686	6.64908e-33	5.59249e-31	down
ENSG00000163697.15	1.4	1.03-1.91	0.031		-1.02886	1.59486e-14	2.16008e-13	down
ENSG00000163714.16	1.61	1.04-2.49	0.033		0.418458	1.37637e-05	5.45966e-05	up
ENSG00000163815.5	0.78	0.66-0.92	0.004		-3.66733	8.60754e-43	1.87289e-40	down
ENSG00000163818.15	0.67	0.46-0.97	0.036		-0.599875	2.37044e-08	1.43857e-07	down
ENSG00000163827.11	0.75	0.58-0.98	0.036		-2.69377	2.33933e-28	1.30442e-26	down
ENSG00000163879.10	0.85	0.73-0.98	0.026		-0.495721	0.0389236	0.0746977	none
ENSG00000163947.10	0.51	0.35-0.74	0.001		-0.843977	2.73906e-16	4.61342e-15	down
ENSG00000163964.12	1.62	1.03-2.52	0.035		0.346529	0.000191226	0.00062102	up
ENSG00000163975.10	1.26	1.07-1.48	0.006		2.42264	1.86174e-18	4.02247e-17	up
ENSG00000164039.13	0.67	0.49-0.91	0.011		-0.555008	3.03158e-05	0.000113496	down
ENSG00000164087.6	1.37	1.04-1.81	0.025		1.57001	1.10022e-23	4.04114e-22	up
ENSG00000164088.16	0.62	0.45-0.86	0.004		-0.721772	4.75845e-10	3.65731e-09	down
ENSG00000164283.11	1.21	1.02-1.43	0.026		0.425348	0.106586	0.177752	none
ENSG00000164402.12	1.69	1.11-2.55	0.014		0.0543712	0.583195	0.69563	none
ENSG00000164418.18	1.19	1.02-1.39	0.029		2.78043	1.80886e-14	2.44001e-13	up
ENSG00000164466.11	1.58	1.11-2.24	0.011		1.51641	6.5588e-42	1.26244e-39	up
ENSG00000164600.5	2.45	1.06-5.65	0.036		0.101606	0.961915	NA	none
ENSG00000164611.11	1.28	1.04-1.57	0.018		2.37339	9.50625e-31	6.67706e-29	up
ENSG00000164692.16	1.17	1.01-1.34	0.032		1.58584	2.89837e-10	2.30511e-09	up
ENSG00000164694.15	1.12	1-1.26	0.047		2.90206	2.14609e-20	5.66013e-19	up
ENSG00000164794.7	1.21	1.01-1.45	0.034		3.61714	3.78181e-09	2.55283e-08	up
ENSG00000164849.8	0.67	0.47-0.96	0.028		-2.56775	2.77264e-49	1.05719e-46	down
ENSG00000164898.11	0.73	0.55-0.97	0.032		-0.11644	0.426439	0.550153	none
ENSG00000164920.8	1.19	1.01-1.39	0.038		1.02157	0.000301395	0.000944921	up
ENSG00000164924.16	1.56	1.09-2.22	0.015		1.00208	6.90443e-18	1.39538e-16	up
ENSG00000164932.11	1.18	1.02-1.36	0.03		4.0176	1.04097e-57	9.47186e-55	up
ENSG00000164941.12	1.57	1.04-2.36	0.032		1.1219	1.94268e-23	6.91353e-22	up
ENSG00000164983.7	1.42	1.09-1.85	0.01		0.70176	2.31012e-05	8.82351e-05	up
ENSG00000165102.13	1.62	1.23-2.12	0.001		0.555462	0.000177402	0.000579887	up
ENSG00000165194.13	1.26	1.04-1.54	0.021		0.443017	0.174145	0.268177	none
ENSG00000165197.4	0.83	0.72-0.96	0.013		-4.1062	7.05362e-29	4.18989e-27	down
ENSG00000165244.6	1.44	1.09-1.89	0.01		1.0133	3.7668e-09	2.54399e-08	up
ENSG00000165304.6	1.22	1.03-1.44	0.022		3.45955	1.62147e-44	4.08283e-42	up
ENSG00000165376.9	0.92	0.84-1	0.04		2.12207	2.01436e-05	7.76647e-05	up
ENSG00000165474.5	1.14	1.01-1.27	0.027		4.90587	2.09663e-51	9.87536e-49	up
ENSG00000165475.12	0.7	0.53-0.92	0.012		-0.283077	0.0330188	0.0647375	none
ENSG00000165476.11	1.42	1.07-1.9	0.017		0.594121	5.29575e-05	0.00019058	up
ENSG00000165478.6	0.31	0.13-0.76	0.011		-0.921503	0.0403279	0.0770602	none
ENSG00000165816.11	0.79	0.66-0.95	0.011		0.960658	6.80104e-06	2.84135e-05	up
ENSG00000165891.14	1.3	1.08-1.57	0.007		2.6186	1.23737e-21	3.6723e-20	up
ENSG00000165935.8	1.49	1.08-2.05	0.014		2.36291	1.62693e-12	1.72044e-11	up
ENSG00000166073.7	1.22	1.02-1.46	0.034		0.462065	0.0402827	0.0769923	none
ENSG00000166199.11	0.67	0.49-0.92	0.013		-0.0654007	0.550501	0.66749	none
ENSG00000166342.17	1.17	1.01-1.35	0.032		5.51952	1.03447e-31	7.77034e-30	up
ENSG00000166387.10	0.6	0.43-0.82	0.002		0.318921	0.0222882	0.0458427	up
ENSG00000166405.13	0.79	0.67-0.94	0.007		-1.50627	3.085e-07	1.59596e-06	down
ENSG00000166592.10	0.87	0.76-0.98	0.026		-1.16067	0.000215154	0.000692771	down
ENSG00000166669.12	0.72	0.56-0.93	0.013		-0.189873	0.20173	0.303045	none
ENSG00000166816.12	0.85	0.73-1	0.047		-0.193113	0.428377	0.552013	none
ENSG00000166845.12	1.36	1.03-1.8	0.031		0.129177	0.445044	0.567988	none
ENSG00000166851.13	1.36	1.12-1.64	0.002		3.05189	4.38536e-44	1.06904e-41	up
ENSG00000166912.15	0.58	0.39-0.88	0.011		-1.21709	1.97827e-29	1.22984e-27	down
ENSG00000166923.9	1.12	1.01-1.24	0.036		5.44532	6.19517e-60	7.51605e-57	up
ENSG00000166947.10	0.49	0.28-0.86	0.013		-1.37736	1.20406e-11	1.15462e-10	down
ENSG00000166965.11	1.44	1.04-1.98	0.028		1.13165	1.55276e-19	3.74497e-18	up
ENSG00000166984.10	0.6	0.37-0.97	0.037		1.05145	0.0517512	0.09555	none
ENSG00000167114.11	1.55	1.07-2.24	0.019		0.553018	1.98447e-06	9.03871e-06	up
ENSG00000167208.13	0.81	0.66-0.99	0.044		-0.639263	0.000859405	0.00246628	down
ENSG00000167434.8	0.81	0.69-0.96	0.012		-4.86636	1.91422e-36	2.24087e-34	down
ENSG00000167604.12	0.75	0.57-0.97	0.029		-0.767756	1.0886e-06	5.15472e-06	down
ENSG00000167741.9	0.87	0.78-0.97	0.014		-0.500307	0.15869	0.248322	none
ENSG00000167749.10	1.34	1.05-1.71	0.017		0.824169	0.0589889	0.107115	none
ENSG00000167767.12	1.3	1.07-1.58	0.01		2.30553	7.25979e-25	2.95526e-23	up
ENSG00000167772.10	1.14	1.01-1.28	0.036		1.61434	5.16301e-07	2.57321e-06	up
ENSG00000167889.11	1.21	1.04-1.41	0.016		-1.00737	0.00169343	0.0045723	down
ENSG00000167900.10	1.24	1.02-1.51	0.029		2.48282	1.48786e-33	1.32079e-31	up
ENSG00000168004.8	0.82	0.69-0.99	0.035		-0.759006	0.0524026	0.096597	none
ENSG00000168078.8	1.19	1.01-1.39	0.035		3.40359	1.52023e-37	2.0021e-35	up
ENSG00000168079.15	0.87	0.76-0.99	0.04		-2.78902	1.59014e-13	1.90836e-12	down
ENSG00000168116.12	0.68	0.47-1	0.047		0.245496	0.053577	0.0984637	none
ENSG00000168172.7	1.45	1.07-1.97	0.017		0.304507	0.0205009	0.042589	up
ENSG00000168175.13	2.24	1.41-3.57	0.001		-0.0766385	0.394421	0.518413	none
ENSG00000168273.6	0.71	0.5-0.99	0.044		0.0169008	0.904752	0.939384	none
ENSG00000168309.15	0.85	0.72-0.99	0.042		-4.61604	1.09085e-58	1.18036e-55	down
ENSG00000168329.12	0.84	0.71-0.99	0.037		-1.49825	4.34568e-08	2.54102e-07	down
ENSG00000168484.11	0.94	0.89-0.99	0.013		-5.44141	5.25521e-18	1.0751e-16	down
ENSG00000168496.3	1.37	1.02-1.83	0.035		1.48277	4.13572e-24	1.57543e-22	up
ENSG00000168522.11	1.57	1.1-2.25	0.014		0.394985	0.000705071	0.00205625	up
ENSG00000168564.5	0.61	0.38-0.98	0.041		-0.123951	0.149351	0.236238	none
ENSG00000168594.14	1.39	1.06-1.82	0.016		-0.792491	0.0300038	0.0594993	none
ENSG00000168757.11	3.26	1.18-9.03	0.023		-0.133964	0.978086	NA	none
ENSG00000168765.14	0.68	0.46-0.99	0.042		-0.196414	0.110148	0.182808	none
ENSG00000168779.18	1.19	1.02-1.39	0.026		2.61725	1.45935e-11	1.3819e-10	up
ENSG00000168826.14	0.56	0.31-0.98	0.043		-0.161088	0.0330959	0.0648665	none
ENSG00000168913.6	0.78	0.62-0.97	0.028		-1.65389	3.06382e-07	1.58582e-06	down
ENSG00000169047.5	1.22	1.02-1.45	0.03		0.637792	0.00233936	0.00611948	up
ENSG00000169184.5	1.23	1.04-1.47	0.018		-0.332568	0.175577	0.270078	none
ENSG00000169442.7	0.84	0.7-1	0.044		-2.4694	1.2019e-28	6.96371e-27	down
ENSG00000169469.8	1.14	1.04-1.24	0.004		6.21432	2.86746e-18	6.0422e-17	up
ENSG00000169607.11	1.27	1.05-1.53	0.012		3.1456	6.42686e-43	1.41377e-40	up
ENSG00000169629.10	0.63	0.43-0.92	0.017		-0.591963	0.00102357	0.00289385	down
ENSG00000169684.12	1.17	1.03-1.34	0.019		3.35622	1.32608e-24	5.25132e-23	up
ENSG00000169704.4	0.58	0.34-0.98	0.044		-3.25956	1.70274e-21	4.97234e-20	down
ENSG00000169783.11	1.17	1.01-1.35	0.041		2.52181	1.12866e-16	1.9915e-15	up
ENSG00000169905.11	1.77	1.09-2.85	0.02		0.244785	0.00482926	0.0117685	up
ENSG00000170027.6	1.69	1.15-2.48	0.007		0.557405	3.28198e-07	1.68826e-06	up
ENSG00000170231.14	0.87	0.75-1	0.046		-0.723019	0.0453642	0.085424	none
ENSG00000170312.14	1.22	1.02-1.46	0.029		2.62783	6.49677e-34	5.99319e-32	up
ENSG00000170324.18	0.79	0.65-0.98	0.028		-1.22538	0.00528526	0.0127475	down
ENSG00000170367.4	0.72	0.55-0.93	0.011		-2.1896	3.2971e-08	1.95908e-07	down
ENSG00000170421.10	1.31	1.01-1.7	0.045		1.26738	5.59475e-15	7.9853e-14	up
ENSG00000170442.10	1.22	1.01-1.47	0.044		1.9086	2.69855e-13	3.16181e-12	up
ENSG00000170465.9	1.25	1.06-1.48	0.008		1.84555	0.00964691	0.0218712	up
ENSG00000170545.15	1.33	1.01-1.76	0.045		-0.10693	0.486165	0.607532	none
ENSG00000170558.7	1.18	1.02-1.36	0.025		1.19493	0.00110714	0.00310858	up
ENSG00000170613.4	10.55	1.28-87.25	0.029		-0.133993	0.978081	NA	none
ENSG00000170703.14	0.81	0.66-0.99	0.038		-2.04501	4.58794e-09	3.06189e-08	down
ENSG00000170775.2	1.16	1-1.35	0.044		2.87205	2.93897e-19	6.90925e-18	up
ENSG00000170779.10	1.41	1.05-1.9	0.023		1.40419	4.17754e-22	1.3036e-20	up
ENSG00000170852.9	1.77	1.07-2.95	0.027		-0.168259	0.039586	0.0758345	none
ENSG00000170881.4	1.46	1.04-2.04	0.029		0.497685	2.64761e-05	0.000100189	up
ENSG00000171094.14	0.75	0.57-0.99	0.042		0.449246	0.172411	0.265937	none
ENSG00000171097.12	1.52	1.06-2.19	0.022		0.0661218	0.594499	0.704996	none
ENSG00000171116.7	0.48	0.23-0.99	0.047		-0.341261	0.359302	0.48249	none
ENSG00000171132.12	0.69	0.48-0.98	0.038		-1.99163	1.73802e-54	1.14416e-51	down
ENSG00000171161.11	1.8	1.05-3.06	0.031		0.112614	0.176114	0.270772	none
ENSG00000171189.15	1.36	1.04-1.78	0.025		-0.665307	0.00110365	0.00310062	down
ENSG00000171241.7	1.4	1.11-1.77	0.004		2.25132	3.18098e-30	2.1368e-28	up
ENSG00000171291.7	0.76	0.6-0.98	0.032		-0.764305	1.44531e-05	5.71389e-05	down
ENSG00000171298.11	1.43	1.06-1.94	0.021		-0.267341	0.0682717	0.121692	none
ENSG00000171303.6	0.84	0.73-0.97	0.017		-2.91813	4.69235e-21	1.30824e-19	down
ENSG00000171403.8	1.56	1.14-2.12	0.005		0.224557	0.770103	0.843985	none
ENSG00000171533.10	0.82	0.69-0.97	0.025		-1.53623	1.29053e-11	1.23194e-10	down
ENSG00000171596.6	0.67	0.5-0.9	0.007		-2.94924	2.64504e-34	2.53342e-32	down
ENSG00000171606.16	1.5	1.02-2.22	0.041		-0.189611	0.0601695	0.108982	none
ENSG00000171612.6	0.68	0.47-0.98	0.039		0.289946	0.0272924	0.0547846	none
ENSG00000171711.2	0.68	0.49-0.95	0.023		1.28767	0.0578745	0.105311	none
ENSG00000171714.10	0.83	0.71-0.98	0.024		-0.954471	0.00177853	0.00478177	down
ENSG00000171817.15	0.72	0.55-0.95	0.019		-0.940874	2.1506e-06	9.74218e-06	down
ENSG00000171827.9	0.68	0.48-0.96	0.028		0.0658742	0.602566	0.711779	none
ENSG00000171848.12	1.24	1.04-1.48	0.014		3.18395	7.48129e-43	1.63673e-40	up
ENSG00000171885.12	0.9	0.83-0.98	0.012		-2.99446	2.28916e-14	3.04482e-13	down
ENSG00000171962.16	0.77	0.61-0.98	0.037		-1.83062	1.16603e-17	2.28952e-16	down
ENSG00000172061.8	1.12	1.01-1.25	0.038		2.68877	3.1062e-15	4.59231e-14	up
ENSG00000172071.10	0.61	0.4-0.93	0.023		0.305471	0.00280143	0.00720672	up
ENSG00000172243.16	0.83	0.7-1	0.047		-0.628679	0.00142066	0.00389867	down
ENSG00000172270.17	1.66	1.1-2.49	0.015		0.278795	0.0116497	0.0258842	up
ENSG00000172349.15	0.82	0.67-1	0.049		-0.874444	1.45577e-06	6.76611e-06	down
ENSG00000172661.16	0.57	0.34-0.96	0.034		-0.325194	0.000172117	0.000563947	down
ENSG00000172671.18	0.62	0.39-0.99	0.044		-0.209024	0.0260367	0.0525882	none
ENSG00000172738.10	0.73	0.54-0.99	0.042		0.0359982	0.850986	0.901945	none
ENSG00000172789.3	1.46	1.02-2.09	0.037		1.16511	0.0137961	0.0300512	up
ENSG00000172794.18	0.8	0.66-0.97	0.025		-0.740161	0.00116167	0.00324848	down
ENSG00000172824.13	0.8	0.67-0.95	0.012		-0.109149	0.588269	0.699764	none
ENSG00000172840.5	0.58	0.38-0.87	0.008		-0.120258	0.24916	0.360017	none
ENSG00000172987.11	0.79	0.63-0.98	0.032		-2.58707	8.92185e-16	1.41519e-14	down
ENSG00000173200.11	0.83	0.69-1	0.047		-0.25904	0.257739	0.370242	none
ENSG00000173207.11	1.24	1-1.53	0.049		1.80818	9.70642e-26	4.26571e-24	up
ENSG00000173218.13	1.41	1.02-1.96	0.036		0.812016	1.1401e-10	9.5974e-10	up
ENSG00000173226.15	0.62	0.4-0.97	0.035		0.114018	0.264305	0.378081	none
ENSG00000173376.12	0.88	0.78-0.99	0.037		-1.60111	1.85535e-08	1.1405e-07	down
ENSG00000173540.11	0.42	0.25-0.71	0.001		0.306753	0.000609322	0.00180115	up
ENSG00000173546.7	1.31	1.05-1.63	0.017		-0.969411	9.34972e-08	5.2062e-07	down
ENSG00000173578.7	0.74	0.6-0.91	0.005		-0.204388	0.451128	0.574051	none
ENSG00000173626.8	0.48	0.24-0.96	0.037		-2.46617	1.91702e-27	9.83971e-26	down
ENSG00000173653.6	1.54	1-2.37	0.047		0.532703	1.60719e-08	9.96371e-08	up
ENSG00000173947.12	0.84	0.71-0.98	0.031		-1.2085	1.42321e-05	5.63543e-05	down
ENSG00000173988.11	0.58	0.37-0.91	0.017		-1.31439	5.9277e-08	3.39079e-07	down
ENSG00000174013.7	1.58	1.1-2.27	0.014		0.759263	3.00556e-10	2.38515e-09	up
ENSG00000174123.9	0.83	0.7-0.99	0.04		1.25805	4.65315e-06	1.99479e-05	up
ENSG00000174371.15	1.29	1.08-1.55	0.006		3.30733	2.97608e-43	6.73166e-41	up
ENSG00000174417.2	1.77	1.08-2.91	0.025		-0.205484	0.775654	0.848218	none
ENSG00000174482.9	1.47	1.17-1.85	0.001		1.23938	0.01197	0.0265222	up
ENSG00000174529.7	2.06	1.34-3.14	0.001		0.726318	1.92709e-09	1.35785e-08	up
ENSG00000174562.12	1.81	1.06-3.1	0.029		1.0519	0.27438	0.389321	none
ENSG00000174844.13	0.85	0.74-0.99	0.037		-2.33052	9.01895e-11	7.70227e-10	down
ENSG00000174970.3	29.58	2.32-377.68	0.009		-0.0337494	0.994479	NA	none
ENSG00000174992.7	1.26	1.04-1.53	0.019		1.81659	0.000693042	0.00202471	up
ENSG00000174996.10	1.58	1.07-2.35	0.023		0.443511	3.40652e-05	0.000126398	up
ENSG00000175073.7	1.47	1-2.16	0.047		0.205374	0.0238085	0.0486175	up
ENSG00000175143.3	186.31	2.4-14459.09	0.019		-0.0466479	0.992368	NA	none
ENSG00000175166.15	1.58	1.05-2.4	0.03		0.594642	4.28381e-09	2.87184e-08	up
ENSG00000175305.15	1.29	1.04-1.61	0.022		1.85171	5.96386e-21	1.64215e-19	up
ENSG00000175567.7	0.74	0.56-0.98	0.033		0.318362	0.0427328	0.081079	none
ENSG00000175592.7	1.16	1.01-1.33	0.035		-0.167597	0.618629	0.724978	none
ENSG00000175602.3	1.33	1.04-1.69	0.022		-0.672215	5.90832e-05	0.000210844	down
ENSG00000175619.2	37.25	1.06-1306.17	0.046		-0.0300272	0.995088	NA	none
ENSG00000175874.8	1.19	1.04-1.37	0.014		1.67576	1.45362e-05	5.74332e-05	up
ENSG00000175879.8	1.26	1.08-1.47	0.003		0.220079	0.525722	0.644867	none
ENSG00000176022.4	1.53	1.01-2.33	0.044		0.208608	0.0378343	0.072929	none
ENSG00000176029.12	0.77	0.65-0.9	0.001		-1.90307	2.36662e-07	1.24688e-06	down
ENSG00000176046.8	0.82	0.69-0.98	0.028		-0.827569	5.78508e-05	0.000206851	down
ENSG00000176160.8	0.5	0.28-0.91	0.022		-1.13691	9.9641e-07	4.75021e-06	down
ENSG00000176170.12	1.24	1.05-1.48	0.014		0.519897	0.0240155	0.0489578	up
ENSG00000176204.12	1.41	1.02-1.96	0.039		-2.20313	5.76354e-09	3.78401e-08	down
ENSG00000176209.10	1.37	1.02-1.86	0.039		-0.01296	0.92618	0.954005	none
ENSG00000176222.8	0.78	0.62-1	0.048		0.0503025	0.815439	0.876827	none
ENSG00000176383.8	1.21	1-1.47	0.045		1.80291	2.02924e-12	2.119e-11	up
ENSG00000176393.9	1.62	1.06-2.46	0.025		0.436225	1.46233e-05	5.77545e-05	up
ENSG00000176533.11	0.75	0.61-0.91	0.003		-1.08951	1.91348e-08	1.17245e-07	down
ENSG00000176619.9	1.4	1.05-1.87	0.021		0.853171	4.50315e-09	3.00931e-08	up
ENSG00000176635.16	0.71	0.51-0.99	0.045		1.09765	0.00767943	0.0178441	up
ENSG00000176678.5	1.19	1-1.42	0.047		0.444169	0.101128	0.170066	none
ENSG00000176749.7	1.51	1.2-1.9	0		1.51848	7.19493e-14	9.02715e-13	up
ENSG00000176769.9	0.65	0.45-0.94	0.022		0.373326	0.452355	0.575246	none
ENSG00000176853.14	1.52	1.06-2.18	0.023		0.620195	1.33476e-07	7.27153e-07	up
ENSG00000176884.13	1.27	1.06-1.52	0.01		2.8541	8.0385e-21	2.18932e-19	up
ENSG00000176890.14	1.3	1.05-1.6	0.017		1.76165	3.51273e-21	9.90391e-20	up
ENSG00000176900.2	43.5	4.48-421.87	0.001		-0.0387092	0.993667	NA	none
ENSG00000177054.12	0.68	0.46-1	0.049		0.94539	1.23132e-15	1.91743e-14	up
ENSG00000177181.13	0.83	0.71-0.96	0.012		-0.728975	0.0067388	0.0158567	down
ENSG00000177301.12	0.63	0.42-0.95	0.029		-0.318336	0.22736	0.333966	none
ENSG00000177558.3	0.36	0.16-0.81	0.013		-2.05111	4.43107e-09	2.96511e-08	down
ENSG00000177879.13	1.79	1.14-2.83	0.012		0.510898	2.37358e-08	1.43983e-07	up
ENSG00000177888.7	1.47	1-2.14	0.047		0.936766	1.23862e-19	3.02373e-18	up
ENSG00000177947.12	1.6	1.11-2.31	0.012		0.178984	0.753701	0.832336	none
ENSG00000177984.6	1.22	1.04-1.42	0.014		-0.165489	0.789571	0.858256	none
ENSG00000178084.1	0.54	0.32-0.9	0.018		-6.27841	1.3072e-34	1.27647e-32	down
ENSG00000178209.13	1.32	1.06-1.66	0.015		0.0955689	0.595768	0.706166	none
ENSG00000178342.4	1.36	1.06-1.76	0.017		1.90034	1.23277e-10	1.03275e-09	up
ENSG00000178397.11	1.51	1.03-2.21	0.035		1.04106	2.26017e-20	5.94535e-19	up
ENSG00000178473.6	0.86	0.74-0.99	0.042		0.3027	0.542926	0.660767	none
ENSG00000178645.11	0.31	0.12-0.84	0.021		-1.9604	0.00270235	0.00697505	down
ENSG00000178694.8	0.51	0.28-0.95	0.033		0.0623011	0.440817	0.56414	none
ENSG00000178734.5	0.55	0.36-0.86	0.008		-1.77362	1.93446e-09	1.3628e-08	down
ENSG00000178965.12	0.88	0.78-1	0.049		-2.53889	5.22889e-08	3.01953e-07	down
ENSG00000179023.8	0.87	0.77-0.98	0.026		0.797133	0.00542134	0.0130367	up
ENSG00000179041.3	1.42	1.04-1.94	0.025		0.84603	1.39508e-08	8.72576e-08	up
ENSG00000179111.7	1.47	1.11-1.95	0.007		1.47252	0.00017835	0.000582747	up
ENSG00000179133.10	0.74	0.55-0.98	0.038		-4.44019	3.95163e-41	7.15871e-39	down
ENSG00000179144.4	0.8	0.64-1	0.045		-1.84073	4.68795e-23	1.60006e-21	down
ENSG00000179148.8	1.42	1.09-1.84	0.01		2.55891	2.19432e-15	3.30271e-14	up
ENSG00000179241.11	1.29	1.03-1.61	0.024		0.303455	0.118962	0.195115	none
ENSG00000179299.15	0.69	0.55-0.88	0.003		0.220307	0.174914	0.269196	none
ENSG00000179344.15	0.85	0.76-0.97	0.013		-0.647741	0.0084031	0.0193293	down
ENSG00000179431.6	1.3	1.05-1.63	0.019		0.598978	0.00527668	0.0127279	up
ENSG00000179477.8	1.37	1.1-1.72	0.005		1.17865	0.00113603	0.00318257	up
ENSG00000179583.16	0.8	0.68-0.94	0.007		-0.698453	0.000764175	0.00221282	down
ENSG00000179636.13	0.34	0.14-0.83	0.017		-1.37024	7.22919e-05	0.000253709	down
ENSG00000179796.10	0.54	0.33-0.88	0.013		-1.49654	0.000996807	0.00282376	down
ENSG00000179813.5	0.89	0.79-1	0.048		-2.52508	2.63315e-08	1.58694e-07	down
ENSG00000179826.6	1.91	1.17-3.1	0.009		1.6146	0.00856385	0.0196688	up
ENSG00000179846.8	1.46	1.07-2	0.017		2.71911	1.93534e-19	4.6425e-18	up
ENSG00000179869.13	0.87	0.77-0.98	0.022		0.310961	0.389019	0.512986	none
ENSG00000179909.14	0.78	0.62-0.98	0.033		-0.0944803	0.637213	0.740364	none
ENSG00000180008.8	1.62	1-2.6	0.048		-0.0238883	0.789286	0.858072	none
ENSG00000180016.2	3.96	1.17-13.35	0.027		-0.113705	0.91031	NA	none
ENSG00000180053.7	2.47	1.2-5.07	0.014		0.753454	0.797413	0.864035	none
ENSG00000180096.10	0.79	0.63-0.99	0.043		0.0844971	0.640353	0.742891	none
ENSG00000180176.13	1.38	1.13-1.69	0.002		1.51523	0.00308286	0.00787102	up
ENSG00000180440.3	0.74	0.57-0.97	0.029		-6.16591	5.63442e-34	5.23386e-32	down
ENSG00000180667.9	1.8	1.25-2.57	0.001		0.560804	4.42252e-06	1.90346e-05	up
ENSG00000180730.4	0.85	0.75-0.96	0.01		0.0742862	0.837668	0.892524	none
ENSG00000180745.4	1.23	1.03-1.48	0.022		1.67389	1.21369e-05	4.85864e-05	up
ENSG00000180785.8	1.23	1.03-1.48	0.024		3.57915	2.4655e-19	5.84075e-18	up
ENSG00000180787.5	0.74	0.58-0.93	0.012		-0.741504	1.75683e-06	8.0698e-06	down
ENSG00000180806.4	1.17	1.02-1.34	0.022		2.99888	7.28015e-12	7.12462e-11	up
ENSG00000180834.6	1.31	1.01-1.69	0.043		0.606503	0.00118195	0.00329759	up
ENSG00000180974.3	4.75	1.06-21.17	0.041		0.130491	0.963434	NA	none
ENSG00000181007.8	0.78	0.61-1	0.046		0.0580497	0.722249	0.807776	none
ENSG00000181035.12	0.65	0.48-0.87	0.004		-0.467384	0.000304908	0.000954738	down
ENSG00000181036.12	0.8	0.65-1	0.049		-0.707517	0.00865789	0.0198669	down
ENSG00000181215.11	0.6	0.4-0.9	0.014		0.852641	0.0111222	0.0248446	up
ENSG00000181234.9	0.78	0.61-0.98	0.036		-2.52146	1.48264e-08	9.23211e-08	down
ENSG00000181333.11	1.19	1.03-1.37	0.017		1.40106	0.000608535	0.00179909	up
ENSG00000181355.19	1.25	1.02-1.53	0.033		3.38014	5.6599e-05	0.000202647	up
ENSG00000181499.2	1.27	1.03-1.55	0.024		0.0703282	0.928349	0.955534	none
ENSG00000181588.16	1.32	1-1.73	0.049		0.725174	1.61685e-07	8.69825e-07	up
ENSG00000181631.6	0.77	0.64-0.93	0.006		-0.885437	8.87208e-05	0.000306183	down
ENSG00000181666.16	0.65	0.45-0.94	0.023		0.323714	0.00489835	0.0119187	up
ENSG00000181788.3	1.6	1.04-2.45	0.032		0.434506	7.78612e-06	3.21631e-05	up
ENSG00000181896.10	0.56	0.36-0.89	0.014		0.39081	0.000176738	0.000577811	up
ENSG00000181958.3	2261.19	2.38-2152504.05	0.027		-0.0466485	0.992368	NA	none
ENSG00000182141.8	0.58	0.37-0.91	0.019		0.0657751	0.613686	0.721149	none
ENSG00000182170.3	1.58	1.01-2.48	0.045		0.830311	0.56447	0.679346	none
ENSG00000182230.10	0.74	0.58-0.94	0.015		-1.76876	9.2071e-06	3.75755e-05	down
ENSG00000182261.3	1.66	1.08-2.54	0.02		-0.232336	0.803871	0.868611	none
ENSG00000182315.7	125.09	2.25-6968.11	0.019		-0.117325	0.980807	NA	none
ENSG00000182389.17	0.75	0.6-0.93	0.007		-1.81799	5.78657e-11	5.06717e-10	down
ENSG00000182400.13	1.52	1.02-2.26	0.04		0.198792	0.0697779	0.124034	none
ENSG00000182472.7	0.8	0.66-0.97	0.02		1.52767	6.57553e-12	6.47302e-11	up
ENSG00000182481.7	1.36	1.07-1.73	0.011		1.94981	2.09042e-28	1.17052e-26	up
ENSG00000182533.6	0.62	0.39-0.99	0.045		-3.04191	2.54737e-14	3.36035e-13	down
ENSG00000182545.6	1.47	1.08-2.02	0.016		1.6738	0.000270449	0.000855268	up
ENSG00000182557.6	0.73	0.55-0.97	0.027		-0.0374773	0.856548	0.906039	none
ENSG00000182585.8	1.23	1.05-1.45	0.011		-2.55003	1.42223e-07	7.71339e-07	down
ENSG00000182628.11	1.43	1.03-2	0.034		0.395898	0.00104081	0.00293719	up
ENSG00000182652.1	2261.19	2.38-2152504.05	0.027		-0.117332	0.980806	NA	none
ENSG00000182759.3	1.47	1.17-1.86	0.001		-0.537895	0.0859301	0.147836	none
ENSG00000182957.14	0.66	0.47-0.92	0.014		-0.681755	4.87255e-10	3.73783e-09	down
ENSG00000182974.3	158.14	1.36-18393.02	0.037		-0.0595984	0.99025	NA	none
ENSG00000182983.13	0.79	0.63-0.98	0.032		-0.778198	0.000786428	0.00227299	down
ENSG00000183044.10	0.82	0.68-0.99	0.038		0.148024	0.48751	0.608775	none
ENSG00000183134.4	0.6	0.41-0.88	0.009		-1.04645	8.59876e-06	3.52913e-05	down
ENSG00000183255.10	1.66	1.16-2.37	0.005		0.332212	0.00218297	0.00575111	up
ENSG00000183273.5	0.83	0.7-0.98	0.029		-2.11374	5.85937e-07	2.89576e-06	down
ENSG00000183309.10	1.53	1.01-2.32	0.042		0.836883	1.63879e-15	2.51285e-14	up
ENSG00000183379.7	0.78	0.62-0.97	0.024		-2.3376	1.03532e-10	8.76881e-10	down
ENSG00000183389.4	4.2	1.31-13.47	0.016		0.376226	0.938508	NA	none
ENSG00000183426.14	0.73	0.57-0.95	0.019		-0.422499	0.0143686	0.0311761	down
ENSG00000183549.9	0.75	0.6-0.95	0.018		-1.64406	2.10751e-09	1.47718e-08	down
ENSG00000183665.5	1.58	1.03-2.44	0.038		0.499791	3.2886e-05	0.000122363	up
ENSG00000183671.11	1.32	1.1-1.59	0.003		1.13156	0.000712379	0.0020757	up
ENSG00000183770.5	1.29	1.02-1.63	0.036		3.52474	6.0856e-07	2.99795e-06	up
ENSG00000183775.9	0.72	0.52-1	0.047		-1.96951	9.72413e-18	1.92925e-16	down
ENSG00000183791.4	1224.05	6.73-222628.41	0.007		-0.0783916	0.987176	NA	none
ENSG00000183856.9	1.23	1.04-1.47	0.017		3.32577	4.40493e-49	1.64819e-46	up
ENSG00000184033.11	5.26	1.3-21.29	0.02		-0.0337423	0.99448	NA	none
ENSG00000184140.5	171.91	3.75-7871.17	0.008		-0.178641	0.970781	NA	none
ENSG00000184205.13	0.73	0.54-0.98	0.036		-0.594326	2.27987e-05	8.7138e-05	down
ENSG00000184208.10	1.54	1.06-2.23	0.023		-0.0257228	0.818492	0.878954	none
ENSG00000184270.4	1.94	1.13-3.34	0.016		1.9663	5.73648e-05	0.000205187	up
ENSG00000184293.6	0.74	0.56-0.97	0.027		0.405054	0.0733265	0.129235	none
ENSG00000184363.8	1.36	1.02-1.81	0.037		1.49103	7.17864e-23	2.40909e-21	up
ENSG00000184394.1	3.06	1.04-9.05	0.043		0.220092	0.963994	NA	none
ENSG00000184454.6	0.84	0.71-0.99	0.04		-0.235327	0.351196	0.473934	none
ENSG00000184515.9	0.78	0.66-0.93	0.006		-1.23707	8.74417e-06	3.58176e-05	down
ENSG00000184588.16	0.78	0.63-0.97	0.024		-0.823548	7.67238e-06	3.17424e-05	down
ENSG00000184613.9	0.83	0.69-0.98	0.031		-1.29143	1.64333e-06	7.58238e-06	down
ENSG00000184635.12	0.75	0.58-0.96	0.024		1.22978	1.86147e-13	2.22001e-12	up
ENSG00000184661.12	1.27	1.04-1.56	0.018		2.84294	4.92213e-35	5.01431e-33	up
ENSG00000184719.10	0.75	0.58-0.97	0.03		0.387361	0.0179438	0.0378522	up
ENSG00000184743.11	1.54	1.05-2.28	0.029		0.0463261	0.6016	0.711036	none
ENSG00000184916.7	1.25	1.01-1.54	0.039		-0.0643824	0.717701	0.80433	none
ENSG00000184992.10	1.38	1.01-1.91	0.046		1.16868	6.4436e-17	1.16573e-15	up
ENSG00000185008.16	0.84	0.72-0.98	0.027		-1.8148	7.05229e-10	5.28836e-09	down
ENSG00000185069.2	1.8	1.28-2.53	0.001		-1.09352	0.206688	0.309102	none
ENSG00000185339.7	0.77	0.6-1	0.046		0.0102111	0.950014	0.969286	none
ENSG00000185340.14	1.58	1.13-2.21	0.008		-0.728632	8.8874e-09	5.68306e-08	down
ENSG00000185432.11	0.8	0.64-0.99	0.04		-1.8028	3.14973e-22	9.93717e-21	down
ENSG00000185479.5	1.12	1.01-1.24	0.038		3.55929	1.00925e-08	6.40254e-08	up
ENSG00000185519.8	1.4	1.08-1.81	0.011		2.9315	1.13822e-11	1.09517e-10	up
ENSG00000185567.6	1.16	1.02-1.32	0.02		2.07188	2.95765e-11	2.69242e-10	up
ENSG00000185585.18	1.22	1.01-1.48	0.041		-1.1373	3.66785e-08	2.16587e-07	down
ENSG00000185651.13	1.59	1.06-2.41	0.026		0.183971	0.060323	0.109226	none
ENSG00000185873.7	3.46	1.06-11.27	0.04		0.269649	0.863236	NA	none
ENSG00000185909.13	0.73	0.55-0.98	0.036		0.208078	0.15938	0.249168	none
ENSG00000185924.6	0.87	0.76-1	0.046		-1.12715	0.000814656	0.0023483	down
ENSG00000186092.4	13348.1	32.22-5530567.16	0.002		-0.0783917	0.987176	NA	none
ENSG00000186094.15	0.65	0.5-0.85	0.002		-0.239733	0.470853	0.592969	none
ENSG00000186193.8	1.28	1.06-1.53	0.009		3.5908	1.1471e-54	7.78392e-52	up
ENSG00000186231.15	0.76	0.59-0.97	0.029		-1.39876	4.33639e-08	2.53596e-07	down
ENSG00000186297.10	1.27	1.03-1.56	0.028		3.80873	1.7781e-07	9.51964e-07	up
ENSG00000186300.10	0.59	0.36-0.96	0.032		-0.245935	0.00788109	0.0182618	down
ENSG00000186377.7	0.86	0.75-0.98	0.027		-0.326864	0.265575	0.379544	none
ENSG00000186432.7	1.7	1.01-2.84	0.045		0.0273872	0.747792	0.827765	none
ENSG00000186496.9	0.7	0.49-0.99	0.043		-0.123999	0.403292	0.527137	none
ENSG00000186517.12	0.79	0.63-1	0.047		-1.27778	3.26653e-14	4.26406e-13	down
ENSG00000186635.13	0.53	0.35-0.81	0.003		-0.873141	1.52679e-19	3.68455e-18	down
ENSG00000186684.11	1.16	1.01-1.33	0.032		2.98063	1.8749e-18	4.04874e-17	up
ENSG00000186787.7	0.55	0.34-0.9	0.018		-0.0325163	0.783329	0.853951	none
ENSG00000186790.5	1.41	1.05-1.91	0.024		3.07668	1.71129e-08	1.05633e-07	up
ENSG00000186832.7	1.12	1.02-1.24	0.014		4.91314	2.08283e-23	7.3795e-22	up
ENSG00000186847.5	1.11	1.01-1.23	0.037		0.664493	NA	NA	none
ENSG00000186871.6	1.26	1.01-1.58	0.042		3.24813	2.39131e-53	1.38752e-50	up
ENSG00000186976.13	0.76	0.6-0.97	0.027		-1.15097	2.40688e-07	1.26692e-06	down
ENSG00000187082.2	743.96	4.56-121418.04	0.011		-0.0783922	0.987176	NA	none
ENSG00000187094.10	1.19	1-1.41	0.046		-1.25215	0.0228359	0.0468227	down
ENSG00000187187.12	0.62	0.42-0.92	0.017		-0.312698	0.00800526	0.0185109	down
ENSG00000187601.4	0.73	0.56-0.95	0.02		-0.60233	2.24698e-05	8.5938e-05	down
ENSG00000187612.1	15.04	2.58-87.56	0.003		-0.0783847	0.987177	NA	none
ENSG00000187624.8	0.77	0.61-0.98	0.03		-0.759043	0.000160672	0.000529481	down
ENSG00000187664.8	27.62	1.08-704.18	0.045		-0.0783877	0.987176	NA	none
ENSG00000187701.3	1550.9	1.8-1333842.32	0.033		-0.046648	0.992368	NA	none
ENSG00000187773.8	1.42	1.09-1.84	0.008		2.31026	8.44738e-06	3.46978e-05	up
ENSG00000187833.7	5.3	1.58-17.81	0.007		0.161146	0.926119	NA	none
ENSG00000187908.14	0.92	0.86-0.99	0.023		-1.42831	0.0015181	0.00413966	down
ENSG00000187912.10	0.72	0.56-0.93	0.012		1.10006	0.000363594	0.00112356	up
ENSG00000187957.7	1.16	1.03-1.31	0.018		0.490213	0.201322	0.302592	none
ENSG00000187994.12	0.65	0.49-0.86	0.003		0.600424	2.66589e-05	0.000100814	up
ENSG00000188039.12	0.85	0.75-0.97	0.015		-1.28655	0.000950618	0.00270612	down
ENSG00000188171.13	0.85	0.72-0.99	0.043		0.457591	0.0635951	0.11438	none
ENSG00000188223.9	1.86	1.01-3.45	0.047		0.492757	0.151101	0.23861	none
ENSG00000188425.3	3.13	1.03-9.5	0.044		-0.0925566	0.918937	NA	none
ENSG00000188483.7	1.25	1.02-1.52	0.029		1.35167	7.41488e-12	7.25115e-11	up
ENSG00000188610.11	1.51	1.17-1.96	0.002		1.91834	6.84346e-14	8.60668e-13	up
ENSG00000188643.9	1.22	1-1.48	0.049		1.3719	1.2541e-10	1.04909e-09	up
ENSG00000188687.14	0.8	0.64-0.99	0.042		-0.151994	0.534892	0.653373	none
ENSG00000188716.5	0.21	0.05-0.87	0.031		-0.292888	0.607603	0.715976	none
ENSG00000188738.12	1.2	1.04-1.38	0.011		2.03247	4.46388e-09	2.98556e-08	up
ENSG00000188817.6	0.87	0.76-0.99	0.036		-2.33614	3.96347e-09	2.6696e-08	down
ENSG00000188828.10	0.32	0.11-0.9	0.031		-0.842936	0.0704172	0.124938	none
ENSG00000188859.6	1.37	1.03-1.81	0.03		0.542282	0.00730339	0.017051	up
ENSG00000188868.12	0.56	0.37-0.85	0.007		-0.25862	0.0310956	0.0613817	none
ENSG00000188869.11	0.56	0.34-0.94	0.028		0.143783	0.574128	0.687847	none
ENSG00000188886.3	0.32	0.18-0.56	0		0.929665	0.00139018	0.00382181	up
ENSG00000188910.7	1.13	1.01-1.27	0.032		3.13753	1.95324e-14	2.6224e-13	up
ENSG00000189045.12	0.76	0.62-0.92	0.006		-0.328647	0.205597	0.307683	none
ENSG00000189057.9	1.28	1.05-1.55	0.014		2.66821	2.05516e-33	1.81234e-31	up
ENSG00000189132.6	32.11	3.12-330.53	0.004		-0.033743	0.99448	NA	none
ENSG00000189337.14	0.79	0.64-0.97	0.027		-1.33703	1.09341e-11	1.05357e-10	down
ENSG00000189350.11	0.82	0.68-0.98	0.031		-2.20823	2.34388e-15	3.51196e-14	down
ENSG00000189377.7	0.88	0.79-0.97	0.014		0.394066	0.150397	0.237677	none
ENSG00000189410.10	1.22	1.02-1.45	0.027		2.31453	6.41788e-08	3.65396e-07	up
ENSG00000189431.7	0.8	0.69-0.92	0.002		0.912802	0.00210233	0.00556083	up
ENSG00000196083.8	1.28	1.03-1.58	0.025		0.511519	0.00704913	0.0165108	up
ENSG00000196098.2	207.4	4.18-10279.88	0.007		-0.0149034	0.997562	NA	none
ENSG00000196126.9	0.84	0.73-0.97	0.018		-0.789183	0.00034714	0.00107595	down
ENSG00000196189.11	0.77	0.6-0.98	0.035		-0.256841	0.117677	0.193309	none
ENSG00000196199.12	0.54	0.34-0.85	0.007		-0.617134	9.33198e-14	1.1542e-12	down
ENSG00000196236.11	2.04	1.34-3.11	0.001		0.53525	1.36196e-06	6.35149e-06	up
ENSG00000196262.12	1.39	1-1.94	0.048		0.744169	3.47399e-11	3.13607e-10	up
ENSG00000196268.10	0.69	0.53-0.9	0.005		-0.422776	0.0137984	0.0300529	down
ENSG00000196363.8	1.97	1.17-3.32	0.011		0.322936	0.000445346	0.0013529	up
ENSG00000196371.3	1.41	1.06-1.87	0.019		0.136525	0.371242	0.49517	none
ENSG00000196408.10	4.67	1.12-19.52	0.035		-0.0141338	0.992358	NA	none
ENSG00000196415.8	1.39	1.02-1.9	0.039		0.161195	0.714479	0.801796	none
ENSG00000196419.11	1.7	1.08-2.68	0.022		0.414105	2.07118e-06	9.40901e-06	up
ENSG00000196437.9	0.7	0.49-0.98	0.039		-0.0319343	0.809548	0.872435	none
ENSG00000196460.11	1.46	1.15-1.86	0.002		1.77875	2.68833e-11	2.46124e-10	up
ENSG00000196466.9	0.58	0.35-0.97	0.037		-0.332434	0.00156517	0.00425613	down
ENSG00000196502.10	0.79	0.64-0.97	0.024		-1.39325	4.772e-12	4.77988e-11	down
ENSG00000196526.9	1.38	1.02-1.87	0.039		0.352955	0.00594734	0.0141596	up
ENSG00000196550.9	1.75	1.3-2.37	0		1.14306	7.69509e-08	4.33367e-07	up
ENSG00000196586.12	0.68	0.49-0.94	0.019		0.36481	0.0031329	0.00798351	up
ENSG00000196588.13	1.69	1.05-2.7	0.03		-0.308609	0.00215953	0.00569634	down
ENSG00000196616.11	0.9	0.82-0.99	0.023		-3.47619	9.98817e-21	2.70742e-19	down
ENSG00000196646.10	0.59	0.39-0.91	0.016		-0.373552	2.94408e-05	0.000110437	down
ENSG00000196734.7	8.16	1.71-38.99	0.009		0.143516	0.974941	NA	none
ENSG00000196735.10	0.85	0.74-0.97	0.015		-0.673057	0.00590573	0.0140714	down
ENSG00000196772.3	1.8	1.04-3.13	0.037		0	1	NA	none
ENSG00000196781.12	1.54	1.09-2.18	0.014		0.359738	0.00343529	0.00866309	up
ENSG00000196923.12	1.33	1.01-1.76	0.044		0.404008	0.00525067	0.0126735	up
ENSG00000196935.7	1.36	1.08-1.72	0.008		0.199685	0.278804	0.394299	none
ENSG00000197013.8	0.57	0.41-0.77	0		-0.202269	0.156525	0.245414	none
ENSG00000197020.9	0.61	0.42-0.88	0.009		0.209514	0.13098	0.211747	none
ENSG00000197044.9	0.65	0.45-0.93	0.02		-0.498946	8.46338e-05	0.000293089	down
ENSG00000197124.10	0.74	0.62-0.89	0.001		-0.147304	0.530224	0.649057	none
ENSG00000197134.10	0.79	0.65-0.96	0.019		0.655018	0.042257	0.0802845	none
ENSG00000197140.13	1.48	1.09-2.01	0.012		1.0542	1.03516e-05	4.19344e-05	up
ENSG00000197170.8	1.61	1-2.58	0.048		0.507009	5.07739e-09	3.35997e-08	up
ENSG00000197241.3	1.69	1.04-2.75	0.035		0.360774	0.40125	0.525068	none
ENSG00000197594.10	1.24	1.06-1.47	0.009		0.476993	0.0712099	0.126115	none
ENSG00000197757.7	1.19	1.04-1.37	0.011		2.16593	6.10964e-09	3.99748e-08	up
ENSG00000197798.7	0.64	0.45-0.91	0.013		-0.246586	0.0515307	0.0952219	none
ENSG00000197857.12	0.52	0.33-0.82	0.005		-0.436302	5.97516e-06	2.51971e-05	down
ENSG00000197905.7	1.43	1.08-1.91	0.014		-0.626604	4.34927e-05	0.000158652	down
ENSG00000197930.11	1.34	1.06-1.7	0.014		1.9806	1.22266e-28	7.06354e-27	up
ENSG00000197943.8	0.79	0.62-1	0.048		-0.663546	2.71334e-05	0.000102482	down
ENSG00000198142.4	1.4	1.03-1.89	0.03		-0.409559	0.00448367	0.011006	down
ENSG00000198252.10	1.72	1.12-2.65	0.014		0.543111	3.11952e-10	2.47008e-09	up
ENSG00000198342.8	0.67	0.47-0.96	0.027		-0.59975	7.75241e-05	0.000270362	down
ENSG00000198353.7	1.21	1-1.45	0.047		1.75546	5.36627e-09	3.54002e-08	up
ENSG00000198429.8	0.73	0.55-0.95	0.022		-0.19309	0.228816	0.335785	none
ENSG00000198435.3	1.3	1.03-1.65	0.03		-0.356958	0.0851833	0.146728	none
ENSG00000198453.11	0.7	0.51-0.96	0.027		-0.167726	0.277961	0.39344	none
ENSG00000198502.5	0.86	0.76-0.96	0.01		-0.970897	0.000473036	0.00142932	down
ENSG00000198517.8	1.24	1.02-1.52	0.035		-0.389883	0.0380909	0.0733388	none
ENSG00000198521.10	0.65	0.52-0.8	0		0.201449	0.265568	0.379544	none
ENSG00000198553.7	0.65	0.46-0.91	0.011		-1.9285	1.31779e-13	1.59827e-12	down
ENSG00000198554.10	1.33	1.07-1.65	0.011		1.69556	2.13156e-20	5.62551e-19	up
ENSG00000198624.11	0.76	0.61-0.94	0.013		-1.31518	2.22329e-14	2.96311e-13	down
ENSG00000198732.9	1.12	1.02-1.24	0.015		3.25729	7.33734e-15	1.03472e-13	up
ENSG00000198752.8	1.49	1.04-2.13	0.03		-0.338537	0.00319269	0.00812088	down
ENSG00000198768.9	1.16	1.01-1.33	0.039		3.98867	6.72555e-23	2.26463e-21	up
ENSG00000198792.11	1.52	1.03-2.23	0.033		0.171987	0.133016	0.214489	none
ENSG00000198826.9	1.26	1.03-1.55	0.025		1.91381	6.14592e-22	1.88262e-20	up
ENSG00000198901.12	1.35	1.1-1.66	0.005		2.4582	7.515e-37	9.17289e-35	up
ENSG00000198934.4	0.7	0.55-0.91	0.006		-0.213269	0.199273	0.300019	none
ENSG00000198939.6	0.64	0.46-0.9	0.01		-0.73852	6.17311e-05	0.00021959	down
ENSG00000198960.9	0.64	0.43-0.94	0.025		0.289309	0.0054257	0.0130449	up
ENSG00000203485.11	1.36	1-1.83	0.048		-0.488387	0.000204509	0.000660939	down
ENSG00000203668.1	1.22	1.01-1.48	0.042		1.26145	4.50618e-10	3.47342e-09	up
ENSG00000203690.10	2.52	1.32-4.83	0.005		0.147321	0.909319	NA	none
ENSG00000203734.10	0.82	0.68-1	0.044		-1.86662	9.54943e-08	5.31339e-07	down
ENSG00000203805.9	1.21	1.05-1.4	0.007		4.00977	5.62743e-27	2.77122e-25	up
ENSG00000203943.7	1.24	1.01-1.52	0.035		0.655216	0.012094	0.0267585	up
ENSG00000203970.3	167.95	6.59-4280.42	0.002		-0.0783913	0.987176	NA	none
ENSG00000204084.11	0.65	0.46-0.93	0.017		-0.661129	1.33866e-07	7.29176e-07	down
ENSG00000204176.12	0.75	0.56-0.98	0.039		-2.84343	1.54612e-23	5.57161e-22	down
ENSG00000204252.11	0.86	0.75-0.99	0.039		-0.996715	4.22275e-05	0.000154423	down
ENSG00000204257.13	0.76	0.65-0.9	0.001		-0.504824	0.00929655	0.0211524	down
ENSG00000204262.10	1.19	1.03-1.38	0.019		2.26114	5.14835e-20	1.30869e-18	up
ENSG00000204287.12	0.84	0.73-0.98	0.021		-0.851989	6.35576e-05	0.000225505	down
ENSG00000204305.12	0.89	0.79-0.99	0.029		-5.55368	1.44692e-48	5.21884e-46	down
ENSG00000204348.8	0.68	0.46-0.99	0.046		0.456235	1.12219e-05	4.51918e-05	up
ENSG00000204388.6	1.41	1.05-1.89	0.022		0.441134	0.00381406	0.00951281	up
ENSG00000204389.9	1.53	1.18-1.98	0.001		0.285373	0.110666	0.183517	none
ENSG00000204475.8	0.77	0.59-1	0.049		-0.579572	0.020966	0.0434402	down
ENSG00000204481.7	2.31	1.43-3.74	0.001		0.299028	0.951096	NA	none
ENSG00000204571.5	0.19	0.04-0.9	0.036		0.510798	0.545313	NA	none
ENSG00000204592.8	0.77	0.59-1	0.047		-1.31411	2.30313e-20	6.04644e-19	down
ENSG00000204873.4	36.44	1.5-886.34	0.027		0.0500753	0.991808	NA	none
ENSG00000204977.8	0.62	0.39-0.99	0.045		-0.214799	0.0219012	0.0451396	down
ENSG00000205022.8	0.38	0.17-0.88	0.024		-1.0303	0.0115739	0.0257502	down
ENSG00000205038.10	0.73	0.58-0.93	0.01		-3.55554	5.31404e-39	8.04492e-37	down
ENSG00000205126.2	0.31	0.1-0.95	0.041		-0.180787	0.780008	0.851583	none
ENSG00000205213.12	1.33	1.06-1.67	0.013		2.64707	7.90968e-52	4.0599e-49	up
ENSG00000205309.12	1.29	1.02-1.64	0.035		0.449418	0.0197523	0.0412198	up
ENSG00000205329.1	105.4	6.38-1742.37	0.001		-0.0278496	0.995444	NA	none
ENSG00000205420.9	1.11	1.04-1.18	0.003		5.86935	1.24386e-22	4.08526e-21	up
ENSG00000205426.9	1.13	1.05-1.22	0.001		4.95695	9.96218e-23	3.29352e-21	up
ENSG00000205476.7	1.57	1.08-2.28	0.019		-0.455579	0.000109623	0.00037197	down
ENSG00000205669.2	2.35	1.14-4.81	0.02		0.493224	0.25511	0.367237	none
ENSG00000205678.6	1.83	1.1-3.02	0.019		-0.0865086	0.985848	NA	none
ENSG00000205784.2	0.65	0.43-0.98	0.042		-0.0816703	0.696068	0.787136	none
ENSG00000206107.2	2261.19	2.38-2152504.05	0.027		-0.117332	0.980806	NA	none
ENSG00000206262.7	1.46	1.1-1.93	0.009		2.93512	1.90666e-05	7.37821e-05	up
ENSG00000206384.9	0.85	0.73-0.99	0.032		-3.08587	3.9147e-24	1.49408e-22	down
ENSG00000211445.10	0.77	0.63-0.94	0.009		-2.34276	7.0343e-32	5.42631e-30	down
ENSG00000211448.10	1.15	1.01-1.32	0.038		2.63666	1.48371e-17	2.88079e-16	up
ENSG00000212935.1	5.83	1.3-26.17	0.021		-0.0981014	0.968685	NA	none
ENSG00000213022.5	5.86	1.03-33.21	0.046		0.311449	0.949079	NA	none
ENSG00000213186.6	1.53	1.14-2.05	0.005		1.50512	2.12577e-24	8.31937e-23	up
ENSG00000213366.11	0.67	0.53-0.84	0.001		-0.585147	0.0004586	0.00138926	down
ENSG00000213533.10	0.42	0.24-0.71	0.001		-0.579286	2.3624e-10	1.89884e-09	down
ENSG00000213585.9	1.54	1.06-2.23	0.025		0.699113	2.24218e-10	1.80911e-09	up
ENSG00000213714.1	0.52	0.29-0.96	0.036		-0.373414	0.0422071	0.0802033	none
ENSG00000213759.7	1.24	1.08-1.42	0.003		5.12248	NA	NA	none
ENSG00000213923.9	1.8	1.24-2.59	0.002		0.266842	0.0214803	0.0443794	up
ENSG00000213988.8	0.83	0.72-0.96	0.013		0.91733	0.00350262	0.00881457	up
ENSG00000214050.6	0.7	0.53-0.94	0.016		1.28192	4.43096e-13	5.05232e-12	up
ENSG00000214128.9	0.86	0.75-0.98	0.025		-1.61041	7.02375e-05	0.000247277	down
ENSG00000214160.8	1.55	1.11-2.16	0.01		1.0966	8.08084e-22	2.44909e-20	up
ENSG00000214265.10	9.65	1.71-54.38	0.01		-0.163914	0.948268	NA	none
ENSG00000214414.8	18.52	2.98-115.1	0.002		0.00384403	0.999371	NA	none
ENSG00000214456.7	0.77	0.64-0.93	0.007		-1.27952	9.13924e-07	4.38097e-06	down
ENSG00000214491.7	0.87	0.75-1	0.048		-2.17	6.36585e-12	6.28361e-11	down
ENSG00000214686.4	0.4	0.17-0.93	0.032		1.22394	0.047039	0.0881297	none
ENSG00000214946.12	0.53	0.31-0.9	0.019		-3.06742	1.0245e-13	1.26167e-12	down
ENSG00000215218.3	1.21	1.02-1.44	0.03		1.88566	4.4945e-08	2.62382e-07	up
ENSG00000215784.5	1.42	1.09-1.84	0.008		2.07796	2.97742e-13	3.46826e-12	up
ENSG00000218336.6	1.17	1-1.37	0.048		0.792889	0.00498429	0.012105	up
ENSG00000219073.6	0.23	0.08-0.72	0.012		3.17518	0.000167747	0.000550937	up
ENSG00000219607.3	1.53	1.21-1.93	0		0.880695	0.000165817	0.000545136	up
ENSG00000221962.4	2.28	1.32-3.93	0.003		-0.442223	0.342962	0.465216	none
ENSG00000223496.2	0.67	0.46-0.97	0.033		-0.0629028	0.554126	0.670646	none
ENSG00000223865.9	0.85	0.74-0.99	0.032		-0.830454	9.21959e-05	0.000317177	down
ENSG00000224916.7	0.65	0.45-0.95	0.024		-1.71649	2.62023e-08	1.5794e-07	down
ENSG00000225968.6	1.41	1.09-1.83	0.009		-0.0867467	0.694501	0.785858	none
ENSG00000226174.5	1.51	1.04-2.18	0.03		0.991497	8.47617e-07	4.07924e-06	up
ENSG00000226784.2	2.32	1.2-4.47	0.012		0.837208	0.000428197	0.00130486	up
ENSG00000226887.6	1.29	1.09-1.54	0.004		1.31479	3.65586e-06	1.59492e-05	up
ENSG00000227507.2	0.81	0.69-0.95	0.011		0.781431	0.000573341	0.00170259	up
ENSG00000227729.3	0.07	0-0.95	0.046		-0.655978	0.693835	NA	none
ENSG00000228696.7	0.68	0.47-0.98	0.037		0.125666	0.522124	0.641416	none
ENSG00000228716.5	1.61	1.15-2.25	0.006		0.838441	5.84911e-11	5.11746e-10	up
ENSG00000229549.7	1081.34	20.22-57827.32	0.001		-0.0783913	0.987176	NA	none
ENSG00000230062.5	0.81	0.67-0.98	0.027		-2.52681	2.45341e-08	1.48465e-07	down
ENSG00000230453.8	1.24	1.04-1.47	0.015		2.46286	4.64201e-09	3.09437e-08	up
ENSG00000231389.6	0.85	0.74-0.98	0.027		-0.838556	0.000169313	0.000555714	down
ENSG00000231861.2	2.71	1.39-5.26	0.003		-1.57631	7.66596e-09	4.94864e-08	down
ENSG00000232434.2	1.31	1.02-1.68	0.037		1.30211	1.7733e-14	2.39608e-13	up
ENSG00000232629.7	0.88	0.78-0.99	0.028		-0.0184883	0.952416	0.970506	none
ENSG00000233041.7	1.2	1-1.44	0.048		0.756076	0.234138	0.342094	none
ENSG00000233670.6	1.53	1.21-1.94	0		-1.92047	0.00546743	0.0131353	down
ENSG00000234284.5	0.73	0.55-0.98	0.033		0.0514924	0.768883	0.843231	none
ENSG00000234444.8	0.73	0.56-0.95	0.019		0.355769	0.0145088	0.031445	up
ENSG00000234465.9	0.67	0.5-0.89	0.007		-0.916769	9.31692e-07	4.46187e-06	down
ENSG00000235098.7	0.83	0.7-0.98	0.024		0.511418	0.0292795	0.0582621	none
ENSG00000235942.2	180.1	8.25-3930.53	0.001		-0.149423	0.975558	NA	none
ENSG00000236424.6	16.25	3.68-71.74	0		-0.0595855	0.990252	NA	none
ENSG00000237038.4	831.46	12.54-55110.94	0.002		-0.149424	0.975558	NA	none
ENSG00000237247.5	3163	5.44-1838427.56	0.013		-0.0783923	0.987176	NA	none
ENSG00000237388.2	6.84	1.12-41.86	0.037		0.0175964	0.997121	NA	none
ENSG00000237440.7	0.68	0.53-0.86	0.001		0.494516	0.0127304	0.0279796	up
ENSG00000238074.4	11.95	2.63-54.23	0.001		-0.0783779	0.987178	NA	none
ENSG00000238227.6	1.9	1.17-3.09	0.01		0.302057	0.000979508	0.00278125	up
ENSG00000239511.2	0.21	0.05-0.82	0.024		-0.187599	0.810775	0.87329	none
ENSG00000239697.9	0.74	0.56-0.99	0.042		-1.19163	2.04748e-20	5.41433e-19	down
ENSG00000239789.4	1.41	1.06-1.89	0.02		0.751638	5.62499e-08	3.23009e-07	up
ENSG00000239961.2	0.75	0.58-0.97	0.027		-0.0216511	0.938829	0.962313	none
ENSG00000240403.4	0.67	0.47-0.96	0.028		-0.32774	0.45593	0.578745	none
ENSG00000241644.2	0.85	0.73-0.98	0.027		-3.60258	1.54984e-36	1.82498e-34	down
ENSG00000242389.6	4609.28	62.03-342525.77	0		-0.102203	0.983281	NA	none
ENSG00000242574.7	0.81	0.69-0.95	0.009		-0.557049	0.00533187	0.0128502	down
ENSG00000242732.4	0.82	0.67-0.99	0.035		-0.687826	0.000648586	0.0019054	down
ENSG00000243772.5	0.67	0.46-0.99	0.045		-1.27801	0.00346595	0.00873216	down
ENSG00000243896.3	0.68	0.48-0.97	0.031		-0.444244	0.0583579	0.106095	none
ENSG00000243955.4	0.89	0.81-0.99	0.025		0.11055	0.805085	0.869454	none
ENSG00000244588.4	1.75	1.1-2.78	0.018		0.554163	0.25254	0.364192	none
ENSG00000244607.4	0.67	0.49-0.93	0.015		-1.63884	3.1868e-13	3.69602e-12	down
ENSG00000244731.6	0.85	0.74-0.98	0.028		0.00931628	0.972308	0.982889	none
ENSG00000244752.2	0.61	0.37-1	0.048		-1.08147	0.000403308	0.00123437	down
ENSG00000248144.4	0.86	0.77-0.97	0.01		1.53811	0.000633897	0.00186663	up
ENSG00000248712.6	0.71	0.56-0.9	0.005		-1.20937	6.08157e-09	3.98041e-08	down
ENSG00000249139.1	0.45	0.21-0.96	0.038		-2.92639	2.23949e-07	1.18348e-06	down
ENSG00000250722.4	0.81	0.68-0.95	0.011		-1.49205	9.10147e-13	9.98866e-12	down
ENSG00000253729.6	1.36	1.04-1.78	0.025		1.01491	4.41176e-12	4.43792e-11	up
ENSG00000253831.1	0.39	0.18-0.83	0.016		0.164322	0.683226	0.777026	none
ENSG00000254656.1	1.31	1-1.72	0.047		2.23006	0.00565342	0.0135363	up
ENSG00000254901.6	0.61	0.41-0.9	0.012		-0.170029	0.0784185	0.136812	none
ENSG00000254959.5	0.54	0.3-0.95	0.032		-3.56308	1.21519e-21	3.61452e-20	down
ENSG00000254995.4	0.79	0.62-0.99	0.041		0.00479234	0.983768	0.990035	none
ENSG00000255292.5	0.34	0.16-0.71	0.004		0.243502	0.460745	0.58347	none
ENSG00000255561.5	0.61	0.4-0.95	0.029		0.0318129	0.791756	0.859837	none
ENSG00000255767.1	149.67	1.38-16184.7	0.036		-0.0337507	0.994478	NA	none
ENSG00000255833.1	0.79	0.62-1	0.047		0.295388	0.287694	0.404429	none
ENSG00000256100.1	2.27	1.02-5.07	0.045		0.293472	0.46592	0.58833	none
ENSG00000256222.2	1.73	1.04-2.87	0.035		0.373925	0.206851	0.309299	none
ENSG00000256229.6	0.84	0.73-0.96	0.01		1.34604	1.36237e-05	5.40843e-05	up
ENSG00000256771.2	0.54	0.37-0.78	0.001		0.649735	7.88224e-08	4.43035e-07	up
ENSG00000257365.6	1.73	1.09-2.76	0.02		0.38416	8.07028e-06	3.32444e-05	up
ENSG00000258992.4	3.16	1.5-6.65	0.003		-0.0783744	0.987178	NA	none
ENSG00000259305.4	1.51	1.06-2.15	0.024		0.811209	7.40854e-07	3.60093e-06	up
ENSG00000260001.5	1.38	1.09-1.75	0.007		2.30491	1.35203e-12	1.45198e-11	up
ENSG00000260300.4	0.56	0.36-0.88	0.011		-0.615269	0.00101828	0.00288024	down
ENSG00000260691.4	0.28	0.11-0.67	0.004		-1.2485	0.00148372	0.00405476	down
ENSG00000260836.1	4.37	1.15-16.61	0.03		-0.222992	0.840158	NA	none
ENSG00000261796.1	0.41	0.19-0.9	0.026		-0.11645	0.745642	0.826116	none
ENSG00000263020.4	2.3	1.31-4.05	0.004		0.849967	0.00136773	0.00376579	up
ENSG00000263465.3	0.57	0.35-0.95	0.029		-0.0196347	0.800604	0.866414	none
ENSG00000263513.4	1.33	1.02-1.73	0.034		2.00302	7.05183e-09	4.57655e-08	up
ENSG00000265818.1	17.03	1.99-145.87	0.01		-0.378035	0.919262	NA	none
ENSG00000266524.2	0.84	0.71-0.99	0.039		-3.75055	1.3658e-30	9.41968e-29	down
ENSG00000267216.1	1.72	1.02-2.88	0.042		0.337944	0.0349598	0.0680665	none
ENSG00000267385.1	0.66	0.47-0.91	0.013		-0.748783	0.0141282	0.0307077	down
ENSG00000267496.3	0.45	0.23-0.88	0.019		-0.897567	0.00655169	0.0154587	down
ENSG00000268104.2	1.16	1.02-1.32	0.022		0.0177979	0.956415	0.973163	none
ENSG00000268182.4	0.54	0.33-0.91	0.02		-0.226203	0.359221	0.482422	none
ENSG00000268187.6	3.21	1.12-9.19	0.03		0.00828433	0.986747	0.9919	none
ENSG00000268223.2	1.53	1.04-2.27	0.033		0.240215	0.534862	0.653355	none
ENSG00000268738.2	2.51	1.19-5.33	0.016		-0.0182515	0.977854	0.986354	none
ENSG00000269028.3	1.29	1.01-1.64	0.041		0.250836	0.242766	0.35247	none
ENSG00000269313.4	0.77	0.61-0.98	0.036		0.39054	0.0216502	0.0446993	up
ENSG00000269743.2	0.61	0.38-0.99	0.047		-0.126809	0.191816	0.290902	none
ENSG00000269897.4	2.27	1.03-5.04	0.043		0.968593	0.0598334	0.108477	none
ENSG00000270099.1	0.12	0.03-0.53	0.005		-0.520957	0.416105	0.540006	none
ENSG00000270339.2	2.34	1.1-4.99	0.028		-0.353975	0.349549	0.472158	none
ENSG00000270882.2	1.39	1.04-1.85	0.026		1.81842	3.0221e-10	2.3978e-09	up
ENSG00000272602.4	0.67	0.45-0.98	0.04		0.0859709	0.482645	0.604208	none
ENSG00000272741.1	3.28	1.09-9.85	0.034		-0.0492083	0.950759	NA	none
ENSG00000273269.1	5.38	1.52-19.04	0.009		-0.110834	0.896903	NA	none
ENSG00000274349.3	0.67	0.47-0.96	0.031		-0.438869	0.00223246	0.00587091	down
ENSG00000275074.1	0.74	0.55-1	0.049		-0.301059	0.0269982	0.0542621	none
ENSG00000277586.1	1.16	1.02-1.31	0.023		1.37462	0.00630206	0.0149304	up
ENSG00000278224.3	0.66	0.46-0.97	0.033		-0.0804016	0.679338	0.774317	none
ENSG00000278259.3	1.31	1-1.73	0.049		1.36739	2.33681e-24	9.10969e-23	up
ENSG00000278522.3	34.12	1.8-645.83	0.019		-0.0408025	0.993325	NA	none
ENSG00000278599.3	1.52	1.13-2.04	0.005		0.48487	0.38242	0.506335	none
ENSG00000279084.1	7.87	1.48-41.97	0.016		0.0984091	0.962876	NA	none
ENSG00000279126.1	2.41	1.01-5.75	0.047		-0.13622	0.799718	0.86583	none
ENSG00000279261.1	0.29	0.12-0.71	0.006		-0.812543	0.0239907	0.0489223	down
ENSG00000279916.1	11.97	1.25-114.94	0.032		-0.160481	0.969501	NA	none
ENSG00000280050.1	6.1	1.07-34.62	0.041		-0.0881874	0.972088	NA	none
ENSG00000280264.1	2.23	1.09-4.55	0.029		0.0712112	0.87385	0.918205	none
ENSG00000280267.2	237.63	1.85-30597.49	0.027		-0.014904	0.997562	NA	none
ENSG00000280427.1	7.05	1.03-48.17	0.046		0.0779912	0.985163	NA	none
ENSG00000280530.1	80.42	1.07-6061.32	0.047		-0.0466475	0.992369	NA	none
ENSG00000281593.1	0.49	0.25-0.96	0.038		0.156955	0.613677	0.721149	none
ENSG00000281760.1	8.2	1.01-66.32	0.048		-0.0472312	0.986062	NA	none

## Sheet: Supplement Table 2
	GSE50081_OS
gene_id	Hazard.Ratio	CI95	P.Value
ENSG00000001461.15	0.27	0.12-0.63	0.002
ENSG00000005187.10	0.47	0.29-0.75	0.001
ENSG00000006007.10	0.49	0.33-0.74	0.001
ENSG00000006042.10	0.63	0.48-0.84	0.001
ENSG00000006606.7	1.55	1.16-2.07	0.003
ENSG00000006659.11	4.75	1.54-14.6	0.007
ENSG00000006740.15	0.52	0.36-0.75	0.001
ENSG00000007944.13	0.46	0.26-0.8	0.007
ENSG00000009780.14	0.22	0.07-0.67	0.008
ENSG00000010803.15	0.37	0.18-0.77	0.008
ENSG00000011295.14	0.57	0.39-0.84	0.004
ENSG00000011638.9	0.62	0.44-0.88	0.008
ENSG00000016602.9	1.56	1.15-2.12	0.005
ENSG00000018280.15	3.08	1.48-6.43	0.003
ENSG00000018625.13	0.57	0.39-0.83	0.003
ENSG00000021776.9	0.4	0.21-0.78	0.007
ENSG00000023041.10	0.45	0.25-0.79	0.006
ENSG00000023839.9	2.24	1.36-3.69	0.001
ENSG00000024862.15	0.52	0.34-0.79	0.002
ENSG00000025423.10	0.78	0.66-0.92	0.004
ENSG00000025708.11	2.05	1.3-3.24	0.002
ENSG00000026559.12	2.44	1.26-4.72	0.008
ENSG00000027869.10	1.92	1.24-2.96	0.003
ENSG00000028528.13	0.24	0.1-0.56	0.001
ENSG00000039600.9	2.94	1.63-5.3	0
ENSG00000042062.10	4.1	1.98-8.51	0
ENSG00000042445.12	0.43	0.24-0.79	0.007
ENSG00000042832.10	3.54	1.43-8.76	0.006
ENSG00000048545.12	5.15	2.16-12.27	0
ENSG00000049656.12	0.16	0.06-0.45	0
ENSG00000050393.10	0.45	0.28-0.74	0.002
ENSG00000051341.12	1.76	1.24-2.51	0.002
ENSG00000052344.14	0.71	0.57-0.9	0.005
ENSG00000054116.10	0.27	0.13-0.57	0.001
ENSG00000056586.14	3.12	1.33-7.3	0.009
ENSG00000058085.13	1.63	1.23-2.17	0.001
ENSG00000059728.9	2.18	1.38-3.45	0.001
ENSG00000059804.14	1.6	1.2-2.12	0.001
ENSG00000060138.11	2.67	1.28-5.56	0.009
ENSG00000060642.9	0.31	0.17-0.57	0
ENSG00000060762.17	0.1	0.03-0.34	0
ENSG00000061936.8	4.89	1.88-12.76	0.001
ENSG00000062096.13	5.09	1.56-16.62	0.007
ENSG00000062716.9	1.76	1.18-2.61	0.006
ENSG00000063322.12	0.44	0.24-0.79	0.006
ENSG00000063660.7	1.78	1.25-2.55	0.002
ENSG00000063854.11	0.37	0.18-0.75	0.006
ENSG00000064999.13	0.42	0.23-0.76	0.005
ENSG00000065618.15	1.37	1.11-1.7	0.003
ENSG00000066185.11	0.53	0.37-0.78	0.001
ENSG00000066583.10	0.51	0.33-0.78	0.002
ENSG00000067225.16	2.81	1.47-5.35	0.002
ENSG00000068489.11	2.84	1.65-4.88	0
ENSG00000068697.6	0.36	0.17-0.74	0.006
ENSG00000069535.13	0.29	0.12-0.69	0.005
ENSG00000069849.9	2.35	1.32-4.2	0.004
ENSG00000070526.13	0.81	0.72-0.92	0.001
ENSG00000071242.10	0.58	0.39-0.87	0.008
ENSG00000071677.1	2.68	1.27-5.65	0.009
ENSG00000071991.7	10.53	2.3-48.18	0.002
ENSG00000072182.11	5.08	1.64-15.77	0.005
ENSG00000072858.9	0.68	0.51-0.9	0.008
ENSG00000073584.17	0.42	0.23-0.77	0.005
ENSG00000073756.10	1.22	1.08-1.37	0.002
ENSG00000073792.14	1.8	1.19-2.71	0.005
ENSG00000074590.12	1.73	1.27-2.34	0
ENSG00000074696.11	0.42	0.24-0.71	0.001
ENSG00000075043.16	5.36	1.69-16.98	0.004
ENSG00000075142.12	0.57	0.37-0.87	0.009
ENSG00000075218.17	1.87	1.26-2.78	0.002
ENSG00000075239.12	0.2	0.06-0.65	0.007
ENSG00000075391.15	6.72	2.68-16.86	0
ENSG00000075426.10	2.18	1.31-3.64	0.003
ENSG00000075618.16	1.57	1.19-2.06	0.001
ENSG00000075785.11	11.77	2.23-62.04	0.004
ENSG00000076864.18	0.47	0.31-0.71	0
ENSG00000078269.12	4.81	1.65-13.97	0.004
ENSG00000078967.11	0.18	0.07-0.49	0.001
ENSG00000079156.15	0.31	0.14-0.66	0.003
ENSG00000079385.20	0.51	0.33-0.78	0.002
ENSG00000080573.6	1.79	1.29-2.48	0
ENSG00000081803.14	0.51	0.36-0.74	0
ENSG00000084112.13	7.86	2.81-21.98	0
ENSG00000084453.15	16.14	2.5-104.33	0.003
ENSG00000085063.13	0.52	0.34-0.78	0.001
ENSG00000085871.7	0.4	0.21-0.76	0.005
ENSG00000086475.13	0.34	0.15-0.74	0.007
ENSG00000087586.16	1.66	1.14-2.43	0.008
ENSG00000088002.10	1.62	1.14-2.31	0.007
ENSG00000088035.14	0.51	0.33-0.78	0.002
ENSG00000088325.14	1.35	1.1-1.65	0.004
ENSG00000088727.11	0.3	0.13-0.67	0.003
ENSG00000088766.10	0.28	0.13-0.63	0.002
ENSG00000088882.7	1.64	1.24-2.17	0.001
ENSG00000089177.16	0.5	0.3-0.83	0.007
ENSG00000089220.4	0.39	0.2-0.75	0.005
ENSG00000090402.6	46.64	4.55-478.32	0.001
ENSG00000090924.13	2.55	1.47-4.44	0.001
ENSG00000091128.11	19.76	2.55-153.46	0.004
ENSG00000092295.10	2.25	1.43-3.54	0
ENSG00000092850.10	0.56	0.36-0.85	0.007
ENSG00000093009.8	1.44	1.09-1.89	0.009
ENSG00000096433.9	0.36	0.18-0.75	0.006
ENSG00000099917.16	2.84	1.32-6.07	0.007
ENSG00000099994.10	0.77	0.63-0.94	0.009
ENSG00000100031.17	4.4	1.46-13.31	0.009
ENSG00000100092.19	2.58	1.3-5.13	0.007
ENSG00000100379.16	10.02	2.51-40.01	0.001
ENSG00000100417.10	0.5	0.32-0.77	0.002
ENSG00000100425.17	0.36	0.17-0.76	0.007
ENSG00000100526.18	1.43	1.14-1.8	0.002
ENSG00000100605.15	5.07	1.59-16.14	0.006
ENSG00000101057.14	1.54	1.15-2.06	0.003
ENSG00000101115.11	1.7	1.15-2.53	0.008
ENSG00000101188.4	2.86	1.39-5.87	0.004
ENSG00000101199.11	2.37	1.24-4.52	0.009
ENSG00000101307.14	4.03	1.58-10.29	0.004
ENSG00000101310.13	0.4	0.24-0.67	0.001
ENSG00000101439.7	0.38	0.19-0.77	0.008
ENSG00000101938.13	0.69	0.56-0.86	0.001
ENSG00000102243.11	1.57	1.18-2.08	0.002
ENSG00000102384.12	7.34	2.27-23.74	0.001
ENSG00000102409.9	0.69	0.54-0.9	0.005
ENSG00000102858.11	0.49	0.29-0.82	0.007
ENSG00000102897.8	0.46	0.29-0.73	0.001
ENSG00000103021.8	0.59	0.46-0.77	0
ENSG00000103024.6	0.43	0.24-0.78	0.005
ENSG00000103042.7	3.48	1.61-7.52	0.002
ENSG00000103316.9	0.7	0.56-0.86	0.001
ENSG00000103342.11	0.22	0.1-0.51	0
ENSG00000103351.11	0.23	0.09-0.61	0.003
ENSG00000103429.9	0.31	0.17-0.56	0
ENSG00000103460.15	0.78	0.67-0.91	0.002
ENSG00000103502.12	0.32	0.14-0.7	0.005
ENSG00000103510.18	0.25	0.1-0.59	0.002
ENSG00000103546.17	11.13	2.14-57.76	0.004
ENSG00000103569.8	1.49	1.14-1.95	0.004
ENSG00000103811.14	0.65	0.48-0.89	0.007
ENSG00000103855.16	3.35	1.42-7.88	0.006
ENSG00000103978.14	0.43	0.23-0.81	0.009
ENSG00000103994.15	0.36	0.2-0.64	0.001
ENSG00000103995.12	5.76	1.82-18.27	0.003
ENSG00000104093.12	1.93	1.21-3.07	0.005
ENSG00000104129.8	0.33	0.16-0.69	0.004
ENSG00000104140.6	1.57	1.2-2.08	0.001
ENSG00000104142.9	4.83	1.8-12.96	0.002
ENSG00000104324.14	0.52	0.35-0.79	0.002
ENSG00000104365.12	0.41	0.21-0.78	0.007
ENSG00000104635.12	2.94	1.32-6.54	0.008
ENSG00000104731.12	3.58	1.44-8.9	0.006
ENSG00000104848.1	6.55	2.55-16.88	0
ENSG00000104892.15	2.49	1.31-4.75	0.006
ENSG00000105048.15	1.33	1.13-1.56	0.001
ENSG00000105063.17	3.1	1.48-6.47	0.003
ENSG00000105398.3	13.63	2.66-69.78	0.002
ENSG00000105419.16	3.8	1.92-7.55	0
ENSG00000105518.12	0.52	0.34-0.79	0.002
ENSG00000105519.11	0.66	0.49-0.89	0.006
ENSG00000105549.9	3.33	1.59-6.98	0.001
ENSG00000105607.11	0.34	0.16-0.72	0.005
ENSG00000106263.16	3.35	1.52-7.4	0.003
ENSG00000106331.13	14.8	2.82-77.78	0.001
ENSG00000106346.10	7.87	1.75-35.41	0.007
ENSG00000106537.7	0.56	0.37-0.85	0.006
ENSG00000106631.7	2.57	1.37-4.81	0.003
ENSG00000106665.14	1.81	1.16-2.82	0.009
ENSG00000107104.17	0.2	0.08-0.51	0.001
ENSG00000107130.8	2.96	1.38-6.38	0.005
ENSG00000107165.11	0.61	0.44-0.83	0.002
ENSG00000107890.15	9.09	2.65-31.15	0
ENSG00000107957.15	2.84	1.4-5.77	0.004
ENSG00000108298.8	0.15	0.04-0.55	0.004
ENSG00000108556.7	7.61	2.24-25.94	0.001
ENSG00000108588.12	0.61	0.42-0.88	0.009
ENSG00000108654.10	0.46	0.28-0.76	0.002
ENSG00000108702.3	2.66	1.33-5.34	0.006
ENSG00000108821.12	2.03	1.26-3.29	0.004
ENSG00000108839.10	2.22	1.28-3.87	0.005
ENSG00000108924.12	0.74	0.6-0.92	0.007
ENSG00000108960.6	1.81	1.2-2.74	0.005
ENSG00000108961.12	0.39	0.2-0.75	0.005
ENSG00000109016.16	0.44	0.28-0.71	0.001
ENSG00000109084.12	0.57	0.41-0.79	0.001
ENSG00000110002.14	0.6	0.42-0.85	0.004
ENSG00000110195.10	0.86	0.77-0.95	0.004
ENSG00000110328.5	0.33	0.16-0.69	0.003
ENSG00000110375.2	4.26	2.01-9.03	0
ENSG00000110395.4	4.82	1.84-12.64	0.001
ENSG00000110536.12	0.36	0.17-0.73	0.004
ENSG00000111206.11	1.37	1.13-1.67	0.002
ENSG00000111275.11	0.53	0.37-0.77	0.001
ENSG00000111640.13	2.52	1.33-4.79	0.005
ENSG00000111665.10	1.4	1.12-1.76	0.003
ENSG00000111725.9	0.56	0.36-0.87	0.009
ENSG00000111846.14	0.42	0.24-0.76	0.004
ENSG00000112167.8	0.12	0.04-0.39	0
ENSG00000112246.8	14.08	2.84-69.81	0.001
ENSG00000112379.8	0.46	0.3-0.72	0.001
ENSG00000112624.11	0.42	0.23-0.76	0.004
ENSG00000112796.8	0.69	0.52-0.91	0.009
ENSG00000112977.14	0.38	0.24-0.61	0
ENSG00000113231.12	0.33	0.14-0.76	0.009
ENSG00000113361.11	4.46	1.79-11.16	0.001
ENSG00000113946.3	5.06	1.65-15.48	0.005
ENSG00000114200.8	0.46	0.28-0.74	0.002
ENSG00000114248.8	0.6	0.41-0.87	0.007
ENSG00000114268.10	2.71	1.51-4.86	0.001
ENSG00000114270.14	1.81	1.34-2.43	0
ENSG00000114279.12	3.39	1.6-7.15	0.001
ENSG00000114349.8	9.9	1.81-54.24	0.008
ENSG00000114354.11	7.71	2.86-20.75	0
ENSG00000114388.11	0.26	0.09-0.72	0.009
ENSG00000114473.12	0.3	0.14-0.65	0.002
ENSG00000114554.10	4.74	2.01-11.19	0
ENSG00000114638.6	1.21	1.06-1.39	0.006
ENSG00000114812.11	0.53	0.33-0.84	0.007
ENSG00000115112.7	0.68	0.52-0.88	0.004
ENSG00000115137.10	0.24	0.09-0.65	0.005
ENSG00000115415.17	1.66	1.16-2.36	0.005
ENSG00000115446.10	0.46	0.26-0.79	0.005
ENSG00000115486.10	0.48	0.28-0.82	0.007
ENSG00000115616.2	4.94	1.95-12.51	0.001
ENSG00000115648.12	0.76	0.63-0.92	0.005
ENSG00000115652.13	0.5	0.32-0.78	0.002
ENSG00000115661.12	0.19	0.06-0.54	0.002
ENSG00000115756.11	0.5	0.31-0.81	0.005
ENSG00000115977.17	27.16	5.12-144.02	0
ENSG00000116005.10	0.59	0.41-0.85	0.004
ENSG00000116117.16	0.07	0.01-0.47	0.006
ENSG00000116288.11	0.07	0.02-0.2	0
ENSG00000116885.17	0.4	0.27-0.6	0
ENSG00000116922.13	0.43	0.25-0.72	0.001
ENSG00000117013.13	0.33	0.15-0.74	0.007
ENSG00000117054.12	0.61	0.45-0.84	0.003
ENSG00000117148.7	3.53	1.44-8.65	0.006
ENSG00000117394.18	1.38	1.11-1.71	0.004
ENSG00000117399.12	1.31	1.08-1.59	0.007
ENSG00000117481.9	0.33	0.15-0.73	0.007
ENSG00000117640.16	0.27	0.14-0.51	0
ENSG00000117676.12	0.44	0.25-0.77	0.005
ENSG00000117748.8	0.46	0.31-0.69	0
ENSG00000117862.10	0.45	0.24-0.82	0.009
ENSG00000118418.13	0.6	0.42-0.85	0.005
ENSG00000118520.12	29.16	2.46-345.86	0.008
ENSG00000118557.14	3.89	1.47-10.32	0.006
ENSG00000119004.13	0.41	0.22-0.77	0.006
ENSG00000119147.8	0.76	0.64-0.89	0.001
ENSG00000119321.7	11.59	2.42-55.43	0.002
ENSG00000119630.12	2.34	1.3-4.21	0.005
ENSG00000119711.11	0.33	0.18-0.6	0
ENSG00000119929.11	0.47	0.27-0.81	0.007
ENSG00000120616.14	0.31	0.15-0.65	0.002
ENSG00000120645.10	7.73	1.75-34.12	0.007
ENSG00000120656.10	0.52	0.34-0.8	0.003
ENSG00000120696.8	0.48	0.31-0.77	0.002
ENSG00000120885.18	0.55	0.4-0.75	0
ENSG00000120949.13	5.94	2.34-15.07	0
ENSG00000121057.11	0.38	0.22-0.67	0.001
ENSG00000121104.6	0.45	0.28-0.71	0.001
ENSG00000121314.2	9.22	2.46-34.6	0.001
ENSG00000121417.12	0.43	0.23-0.79	0.007
ENSG00000121691.4	0.4	0.22-0.71	0.002
ENSG00000121851.11	0.43	0.29-0.63	0
ENSG00000121904.16	4.41	1.55-12.54	0.005
ENSG00000122180.4	5.75	1.82-18.12	0.003
ENSG00000122641.9	1.67	1.17-2.38	0.005
ENSG00000122691.11	1.26	1.06-1.49	0.009
ENSG00000122787.13	28.94	4.03-207.84	0.001
ENSG00000123444.12	0.35	0.16-0.77	0.009
ENSG00000123485.10	1.61	1.22-2.12	0.001
ENSG00000124275.13	0.57	0.39-0.86	0.007
ENSG00000124374.8	0.42	0.28-0.63	0
ENSG00000125037.11	0.39	0.19-0.78	0.008
ENSG00000125124.10	0.51	0.32-0.82	0.005
ENSG00000125144.12	2.7	1.35-5.4	0.005
ENSG00000125304.8	0.62	0.43-0.88	0.008
ENSG00000125319.13	2.41	1.28-4.54	0.007
ENSG00000125798.13	0.68	0.54-0.86	0.001
ENSG00000125827.7	0.34	0.2-0.6	0
ENSG00000125863.16	0.43	0.25-0.75	0.003
ENSG00000125868.14	0.4	0.22-0.72	0.002
ENSG00000126337.12	4.83	1.84-12.71	0.001
ENSG00000126698.9	0.3	0.13-0.71	0.006
ENSG00000127324.7	0.84	0.75-0.94	0.003
ENSG00000127325.17	12.97	2.52-66.62	0.002
ENSG00000127515.1	5.88	1.64-21.05	0.007
ENSG00000127529.7	8	2.04-31.38	0.003
ENSG00000127540.10	0.21	0.06-0.65	0.007
ENSG00000127564.15	2.19	1.22-3.92	0.009
ENSG00000127824.12	1.84	1.17-2.9	0.008
ENSG00000128203.6	1.69	1.15-2.49	0.007
ENSG00000128245.13	6.77	2.07-22.16	0.002
ENSG00000128285.4	3.2	1.76-5.82	0
ENSG00000128311.12	0.55	0.37-0.82	0.003
ENSG00000128335.12	3.11	1.46-6.6	0.003
ENSG00000128463.11	0.48	0.29-0.8	0.005
ENSG00000128510.9	3.39	1.39-8.22	0.007
ENSG00000128519.3	7.44	2.04-27.18	0.002
ENSG00000128591.14	1.74	1.16-2.61	0.007
ENSG00000128602.8	2.8	1.41-5.57	0.003
ENSG00000128833.11	0.62	0.47-0.81	0
ENSG00000128908.14	0.21	0.07-0.6	0.004
ENSG00000128928.7	0.4	0.2-0.8	0.009
ENSG00000129187.13	0.45	0.26-0.8	0.007
ENSG00000129521.12	1.38	1.11-1.71	0.004
ENSG00000129538.12	0.54	0.35-0.84	0.006
ENSG00000129596.4	0.28	0.11-0.69	0.005
ENSG00000129654.7	0.6	0.43-0.85	0.004
ENSG00000129682.12	0.7	0.57-0.87	0.001
ENSG00000129810.13	4.45	1.57-12.61	0.005
ENSG00000130193.7	0.51	0.32-0.8	0.003
ENSG00000130270.15	3.01	1.61-5.6	0.001
ENSG00000130309.9	2.91	1.58-5.35	0.001
ENSG00000130349.8	0.33	0.16-0.65	0.001
ENSG00000130487.5	1.68	1.22-2.32	0.002
ENSG00000130544.10	0.21	0.06-0.67	0.009
ENSG00000130635.14	1.46	1.1-1.92	0.008
ENSG00000130638.14	0.42	0.22-0.78	0.006
ENSG00000130768.13	0.56	0.39-0.81	0.002
ENSG00000130770.16	0.32	0.15-0.66	0.002
ENSG00000130827.6	5.22	1.6-17.04	0.006
ENSG00000131042.12	1.57	1.13-2.19	0.008
ENSG00000131153.7	2.58	1.44-4.63	0.001
ENSG00000131435.11	1.86	1.18-2.93	0.007
ENSG00000131650.12	2.2	1.3-3.74	0.003
ENSG00000131746.11	1.93	1.27-2.94	0.002
ENSG00000131779.9	0.45	0.29-0.68	0
ENSG00000132122.10	0.24	0.1-0.62	0.003
ENSG00000132141.12	0.3	0.13-0.7	0.006
ENSG00000132286.10	0.26	0.11-0.6	0.002
ENSG00000132359.12	0.55	0.36-0.84	0.006
ENSG00000132446.6	1.8	1.19-2.73	0.006
ENSG00000132470.12	2.63	1.28-5.39	0.008
ENSG00000132517.13	0.26	0.12-0.57	0.001
ENSG00000132581.8	0.41	0.23-0.73	0.003
ENSG00000132623.14	0.27	0.11-0.66	0.004
ENSG00000132793.10	4.02	1.42-11.44	0.009
ENSG00000133065.9	0.51	0.31-0.81	0.005
ENSG00000133466.12	2.85	1.71-4.75	0
ENSG00000133710.14	0.78	0.66-0.93	0.006
ENSG00000134013.14	4.16	1.97-8.78	0
ENSG00000134057.13	1.38	1.08-1.77	0.009
ENSG00000134200.3	12.53	2.37-66.19	0.003
ENSG00000134363.10	1.36	1.1-1.69	0.005
ENSG00000134419.14	0.27	0.1-0.72	0.009
ENSG00000134548.8	2.74	1.37-5.46	0.004
ENSG00000134830.5	2.84	1.39-5.79	0.004
ENSG00000135074.14	2.82	1.37-5.84	0.005
ENSG00000135094.9	2.57	1.42-4.64	0.002
ENSG00000135185.10	0.63	0.44-0.89	0.009
ENSG00000135222.6	4.69	1.52-14.43	0.007
ENSG00000135245.9	1.47	1.13-1.93	0.005
ENSG00000135253.12	5.5	2.53-11.97	0
ENSG00000135297.14	0.38	0.2-0.73	0.004
ENSG00000135373.11	0.62	0.45-0.85	0.003
ENSG00000135423.11	0.42	0.22-0.79	0.007
ENSG00000135451.11	1.7	1.21-2.39	0.002
ENSG00000135821.15	2.34	1.35-4.05	0.002
ENSG00000136003.14	0.36	0.18-0.7	0.003
ENSG00000136156.11	0.39	0.2-0.8	0.009
ENSG00000136158.9	0.59	0.43-0.8	0.001
ENSG00000136436.13	0.31	0.13-0.74	0.008
ENSG00000136444.8	0.34	0.15-0.75	0.008
ENSG00000136535.13	9.51	1.89-47.69	0.006
ENSG00000136546.12	0.57	0.4-0.82	0.002
ENSG00000136689.17	2.05	1.25-3.36	0.004
ENSG00000136694.8	3.94	1.49-10.41	0.006
ENSG00000136710.8	0.41	0.22-0.76	0.004
ENSG00000136854.16	0.71	0.55-0.91	0.008
ENSG00000136943.9	1.69	1.3-2.21	0
ENSG00000137038.7	0.23	0.11-0.51	0
ENSG00000137193.12	2.69	1.4-5.17	0.003
ENSG00000137392.8	3.93	1.4-11.03	0.009
ENSG00000137713.14	4.23	1.46-12.28	0.008
ENSG00000137720.6	0.34	0.15-0.76	0.008
ENSG00000137801.10	2.38	1.43-3.98	0.001
ENSG00000137806.7	0.46	0.28-0.77	0.003
ENSG00000138002.13	0.51	0.32-0.81	0.004
ENSG00000138078.14	0.33	0.17-0.62	0.001
ENSG00000138085.15	0.39	0.19-0.78	0.008
ENSG00000138380.16	0.1	0.02-0.46	0.004
ENSG00000138623.8	3.37	1.47-7.76	0.004
ENSG00000138675.15	9.09	1.8-45.98	0.008
ENSG00000138684.6	11.64	2.69-50.32	0.001
ENSG00000138785.13	0.52	0.34-0.82	0.005
ENSG00000138796.14	0.38	0.25-0.57	0
ENSG00000139610.1	3.88	1.49-10.08	0.005
ENSG00000139737.20	0.66	0.51-0.84	0.001
ENSG00000139865.15	7.13	1.79-28.43	0.005
ENSG00000139880.18	3	1.53-5.88	0.001
ENSG00000140092.13	0.67	0.51-0.86	0.002
ENSG00000140319.9	0.3	0.17-0.53	0
ENSG00000140463.12	0.45	0.25-0.8	0.007
ENSG00000140505.6	1.82	1.23-2.71	0.003
ENSG00000140534.12	3.28	1.65-6.53	0.001
ENSG00000140678.15	3.86	1.55-9.62	0.004
ENSG00000140688.15	0.41	0.23-0.72	0.002
ENSG00000140694.15	0.37	0.2-0.68	0.001
ENSG00000140798.14	16.19	2.54-103.02	0.003
ENSG00000141012.11	3.68	1.46-9.29	0.006
ENSG00000141198.12	0.6	0.42-0.85	0.004
ENSG00000141232.4	0.62	0.47-0.82	0.001
ENSG00000141338.12	0.43	0.25-0.73	0.002
ENSG00000141449.13	2.24	1.27-3.96	0.005
ENSG00000141485.14	1.44	1.1-1.9	0.008
ENSG00000142156.13	3.36	1.57-7.16	0.002
ENSG00000142449.11	1.63	1.13-2.35	0.008
ENSG00000142534.5	2.16	1.32-3.54	0.002
ENSG00000142549.9	4.69	2.04-10.78	0
ENSG00000142611.15	0.58	0.42-0.82	0.002
ENSG00000142675.16	0.48	0.28-0.81	0.006
ENSG00000142676.11	0.22	0.1-0.48	0
ENSG00000142687.16	0.44	0.28-0.7	0.001
ENSG00000142794.17	0.24	0.09-0.59	0.002
ENSG00000143036.15	0.66	0.5-0.87	0.003
ENSG00000143149.11	0.35	0.18-0.68	0.002
ENSG00000143153.11	0.65	0.48-0.87	0.004
ENSG00000143158.9	0.39	0.23-0.67	0.001
ENSG00000143183.15	0.42	0.23-0.77	0.005
ENSG00000143222.10	0.27	0.13-0.56	0
ENSG00000143224.16	0.28	0.11-0.71	0.008
ENSG00000143257.10	9.76	2.06-46.35	0.004
ENSG00000143303.10	0.43	0.23-0.81	0.009
ENSG00000143315.6	0.42	0.23-0.78	0.005
ENSG00000143322.18	3.54	1.5-8.37	0.004
ENSG00000143390.16	0.32	0.16-0.65	0.001
ENSG00000143416.19	0.68	0.56-0.84	0
ENSG00000143418.18	0.47	0.28-0.79	0.004
ENSG00000143420.16	0.39	0.2-0.77	0.007
ENSG00000143457.9	0.54	0.34-0.83	0.006
ENSG00000143458.10	0.53	0.33-0.84	0.006
ENSG00000143543.13	0.24	0.1-0.57	0.001
ENSG00000143546.8	1.26	1.07-1.48	0.005
ENSG00000143553.9	0.33	0.17-0.63	0.001
ENSG00000143578.14	0.51	0.35-0.73	0
ENSG00000143847.14	1.86	1.2-2.9	0.006
ENSG00000144063.3	0.76	0.63-0.91	0.003
ENSG00000144136.9	1.69	1.2-2.38	0.003
ENSG00000144659.9	0.34	0.16-0.7	0.003
ENSG00000144668.10	0.41	0.22-0.78	0.007
ENSG00000144821.8	2.5	1.3-4.81	0.006
ENSG00000145014.16	2.44	1.34-4.45	0.004
ENSG00000145321.11	2.6	1.31-5.14	0.006
ENSG00000145687.14	0.28	0.12-0.64	0.003
ENSG00000145826.7	13.45	2.89-62.66	0.001
ENSG00000146006.7	3.89	2.01-7.52	0
ENSG00000146070.15	1.52	1.12-2.07	0.008
ENSG00000146425.9	0.39	0.21-0.75	0.004
ENSG00000146670.8	1.44	1.1-1.88	0.008
ENSG00000146676.6	5.18	1.62-16.57	0.006
ENSG00000146678.8	3.48	1.77-6.82	0
ENSG00000147400.8	0.43	0.26-0.71	0.001
ENSG00000147642.15	0.73	0.61-0.88	0.001
ENSG00000147654.13	0.5	0.3-0.84	0.008
ENSG00000147885.4	12.54	3.57-44.09	0
ENSG00000148156.7	10.61	2.26-49.74	0.003
ENSG00000148734.7	3.89	1.48-10.21	0.006
ENSG00000148773.11	1.6	1.15-2.23	0.005
ENSG00000148848.13	1.61	1.21-2.14	0.001
ENSG00000148950.8	0.45	0.25-0.79	0.006
ENSG00000149782.10	3.64	1.51-8.77	0.004
ENSG00000149932.15	0.34	0.16-0.73	0.006
ENSG00000149970.13	0.04	0.01-0.3	0.001
ENSG00000150337.12	4.18	1.63-10.7	0.003
ENSG00000150456.9	0.23	0.12-0.43	0
ENSG00000150459.11	0.18	0.08-0.41	0
ENSG00000150593.14	4.37	1.58-12.03	0.004
ENSG00000150594.6	0.71	0.56-0.9	0.005
ENSG00000150893.10	0.62	0.43-0.89	0.009
ENSG00000151014.5	2.59	1.39-4.84	0.003
ENSG00000151498.10	0.57	0.43-0.77	0
ENSG00000151500.13	0.34	0.19-0.61	0
ENSG00000151532.12	8.32	1.89-36.64	0.005
ENSG00000151623.13	0.72	0.57-0.9	0.005
ENSG00000151665.11	0.47	0.29-0.75	0.002
ENSG00000151729.9	0.19	0.08-0.45	0
ENSG00000151892.13	0.35	0.16-0.77	0.009
ENSG00000152382.5	0.29	0.12-0.71	0.007
ENSG00000152463.13	2.27	1.47-3.5	0
ENSG00000152583.11	0.67	0.51-0.86	0.002
ENSG00000152642.9	0.66	0.49-0.89	0.007
ENSG00000152763.15	0.13	0.03-0.6	0.009
ENSG00000152910.17	35.89	4.36-295.35	0.001
ENSG00000153066.11	0.4	0.24-0.67	0
ENSG00000153294.10	1.98	1.28-3.08	0.002
ENSG00000153317.13	2.5	1.37-4.55	0.003
ENSG00000153347.8	0.56	0.37-0.84	0.005
ENSG00000153446.14	0.85	0.76-0.94	0.002
ENSG00000153802.10	1.84	1.2-2.83	0.006
ENSG00000153815.15	4.03	1.9-8.54	0
ENSG00000153823.17	0.33	0.16-0.66	0.002
ENSG00000153904.17	0.19	0.06-0.56	0.003
ENSG00000154252.11	4.86	1.83-12.91	0.001
ENSG00000154274.13	0.68	0.53-0.88	0.003
ENSG00000154309.8	0.55	0.36-0.84	0.006
ENSG00000154556.16	0.57	0.39-0.84	0.004
ENSG00000154764.5	3.41	1.63-7.11	0.001
ENSG00000154975.12	0.56	0.36-0.86	0.008
ENSG00000155016.16	0.19	0.06-0.61	0.005
ENSG00000155363.17	2.72	1.46-5.06	0.002
ENSG00000155792.8	0.47	0.28-0.79	0.005
ENSG00000155846.15	3.19	1.35-7.54	0.008
ENSG00000156049.6	0.63	0.45-0.89	0.009
ENSG00000156345.16	0.29	0.13-0.64	0.002
ENSG00000156413.12	0.4	0.2-0.79	0.008
ENSG00000156482.9	0.22	0.09-0.55	0.001
ENSG00000156508.16	0.26	0.12-0.57	0.001
ENSG00000156575.2	7.54	1.88-30.25	0.004
ENSG00000156709.12	0.5	0.31-0.81	0.005
ENSG00000157184.5	0.46	0.26-0.81	0.007
ENSG00000157227.11	2.1	1.39-3.19	0
ENSG00000157349.14	0.44	0.24-0.8	0.008
ENSG00000157456.6	3.43	1.71-6.86	0
ENSG00000157617.15	0.44	0.25-0.78	0.005
ENSG00000157985.16	0.35	0.18-0.69	0.002
ENSG00000158402.17	2.89	1.38-6.08	0.005
ENSG00000158859.9	8.06	2.25-28.9	0.001
ENSG00000158863.20	3.97	1.42-11.13	0.009
ENSG00000159217.8	6.16	2.17-17.48	0.001
ENSG00000160188.8	0.69	0.55-0.87	0.001
ENSG00000160214.11	6	2.36-15.24	0
ENSG00000161055.3	0.87	0.79-0.97	0.008
ENSG00000161328.10	0.32	0.14-0.74	0.008
ENSG00000161638.9	1.93	1.26-2.96	0.003
ENSG00000161642.16	2.14	1.21-3.78	0.009
ENSG00000161920.8	0.32	0.15-0.72	0.006
ENSG00000161944.15	3.41	1.5-7.76	0.003
ENSG00000161980.5	0.28	0.12-0.65	0.003
ENSG00000162384.12	0.39	0.2-0.77	0.006
ENSG00000162390.16	6.94	2.16-22.23	0.001
ENSG00000162407.8	0.55	0.35-0.86	0.008
ENSG00000162415.6	0.64	0.46-0.88	0.006
ENSG00000162493.15	1.72	1.17-2.54	0.006
ENSG00000162517.11	0.42	0.23-0.79	0.006
ENSG00000162542.12	0.3	0.13-0.72	0.006
ENSG00000162670.9	0.21	0.07-0.67	0.008
ENSG00000162735.17	0.32	0.16-0.64	0.001
ENSG00000162753.11	13.95	2-97.14	0.008
ENSG00000162755.12	0.53	0.38-0.75	0
ENSG00000162891.9	6.34	2.57-15.64	0
ENSG00000162892.14	2.59	1.57-4.29	0
ENSG00000162896.5	0.81	0.71-0.93	0.002
ENSG00000162998.4	0.58	0.39-0.86	0.007
ENSG00000163071.9	0.52	0.32-0.83	0.007
ENSG00000163106.9	0.7	0.55-0.88	0.003
ENSG00000163145.11	0.38	0.2-0.69	0.002
ENSG00000163161.11	0.38	0.19-0.79	0.009
ENSG00000163217.1	4.44	1.8-11.01	0.001
ENSG00000163239.11	0.53	0.33-0.85	0.008
ENSG00000163344.5	0.43	0.24-0.76	0.003
ENSG00000163352.5	6.46	1.69-24.73	0.006
ENSG00000163394.5	8.62	2.06-36.09	0.003
ENSG00000163399.14	0.45	0.26-0.77	0.003
ENSG00000163412.11	0.45	0.26-0.78	0.005
ENSG00000163518.9	5.01	1.82-13.78	0.002
ENSG00000163528.11	0.37	0.17-0.78	0.009
ENSG00000163541.10	0.1	0.03-0.4	0.001
ENSG00000163682.14	0.09	0.02-0.32	0
ENSG00000163751.3	0.72	0.6-0.86	0
ENSG00000163793.11	5.55	1.88-16.41	0.002
ENSG00000163814.6	1.87	1.19-2.96	0.007
ENSG00000163872.14	2.29	1.37-3.83	0.002
ENSG00000163875.14	0.23	0.1-0.56	0.001
ENSG00000163877.9	0.24	0.09-0.6	0.002
ENSG00000163879.10	0.63	0.5-0.79	0
ENSG00000163884.3	0.36	0.19-0.67	0.001
ENSG00000164010.12	0.51	0.31-0.85	0.009
ENSG00000164265.7	0.87	0.8-0.95	0.003
ENSG00000164304.14	32.51	3-352.42	0.004
ENSG00000164331.8	0.54	0.34-0.85	0.008
ENSG00000164366.3	0.29	0.15-0.59	0.001
ENSG00000164442.9	0.48	0.28-0.82	0.007
ENSG00000164626.8	0.73	0.6-0.89	0.002
ENSG00000164692.16	1.71	1.19-2.46	0.004
ENSG00000164733.19	2.35	1.28-4.34	0.006
ENSG00000164746.12	0.54	0.36-0.8	0.002
ENSG00000164794.7	7.08	1.71-29.37	0.007
ENSG00000164796.16	11.35	2.09-61.68	0.005
ENSG00000164949.6	0.67	0.51-0.89	0.006
ENSG00000165060.10	0.22	0.07-0.65	0.006
ENSG00000165072.9	0.79	0.67-0.93	0.004
ENSG00000165202.3	13.54	2.38-77.04	0.003
ENSG00000165272.13	0.72	0.58-0.9	0.003
ENSG00000165309.12	0.37	0.18-0.78	0.009
ENSG00000165325.12	74.87	4.44-1262.25	0.003
ENSG00000165474.5	1.21	1.05-1.39	0.008
ENSG00000165475.12	0.49	0.3-0.81	0.006
ENSG00000165516.9	0.5	0.31-0.81	0.005
ENSG00000165556.9	3.11	1.42-6.79	0.004
ENSG00000165775.16	0.11	0.03-0.4	0.001
ENSG00000165799.4	3.24	1.58-6.63	0.001
ENSG00000165841.8	16.88	3.91-72.92	0
ENSG00000165879.8	0.55	0.35-0.86	0.008
ENSG00000165943.4	0.41	0.24-0.7	0.001
ENSG00000166167.16	10.6	1.78-63.03	0.009
ENSG00000166275.14	0.62	0.44-0.88	0.008
ENSG00000166295.7	0.22	0.08-0.6	0.003
ENSG00000166347.17	0.5	0.35-0.73	0
ENSG00000166387.10	0.51	0.35-0.74	0
ENSG00000166448.13	0.72	0.58-0.9	0.004
ENSG00000166562.7	0.5	0.3-0.84	0.008
ENSG00000166670.8	1.2	1.05-1.38	0.009
ENSG00000166800.8	9.33	1.77-49.3	0.009
ENSG00000166803.9	1.62	1.13-2.31	0.008
ENSG00000166863.10	1.68	1.28-2.22	0
ENSG00000166889.13	2.63	1.35-5.15	0.005
ENSG00000166920.9	1.32	1.09-1.61	0.005
ENSG00000166938.11	0.43	0.25-0.76	0.004
ENSG00000166946.12	0.53	0.36-0.78	0.001
ENSG00000166979.11	0.7	0.56-0.89	0.003
ENSG00000167123.17	2.85	1.42-5.69	0.003
ENSG00000167183.2	0.75	0.63-0.9	0.002
ENSG00000167333.11	0.51	0.32-0.8	0.003
ENSG00000167513.7	1.49	1.13-1.97	0.005
ENSG00000167536.12	0.5	0.3-0.83	0.007
ENSG00000167549.17	3.7	1.59-8.63	0.002
ENSG00000167654.16	3.19	1.34-7.56	0.009
ENSG00000167664.7	3.32	1.47-7.53	0.004
ENSG00000167680.14	4.75	1.62-13.99	0.005
ENSG00000167699.12	0.46	0.27-0.78	0.004
ENSG00000167740.8	0.42	0.24-0.72	0.002
ENSG00000167741.9	0.72	0.56-0.91	0.007
ENSG00000167754.11	2.16	1.48-3.14	0
ENSG00000167755.12	1.32	1.08-1.6	0.006
ENSG00000167759.11	2.08	1.24-3.5	0.006
ENSG00000167840.12	0.35	0.21-0.59	0
ENSG00000167900.10	1.47	1.11-1.93	0.007
ENSG00000167981.5	0.34	0.16-0.72	0.005
ENSG00000168079.15	0.62	0.44-0.88	0.008
ENSG00000168092.12	10.09	2.48-41.11	0.001
ENSG00000168101.13	0.32	0.17-0.58	0
ENSG00000168314.16	15.81	2.19-114.07	0.006
ENSG00000168334.8	2.18	1.52-3.14	0
ENSG00000168356.10	59.72	5.35-666.92	0.001
ENSG00000168434.11	0.3	0.15-0.58	0
ENSG00000168476.10	2.73	1.45-5.12	0.002
ENSG00000168487.16	4.58	1.99-10.55	0
ENSG00000168582.4	7.15	1.96-26.05	0.003
ENSG00000168672.3	0.41	0.22-0.76	0.005
ENSG00000168806.7	0.18	0.07-0.47	0.001
ENSG00000168887.9	0.24	0.11-0.53	0
ENSG00000168936.9	0.29	0.14-0.62	0.001
ENSG00000168995.12	3.52	1.59-7.81	0.002
ENSG00000169116.10	0.68	0.53-0.87	0.002
ENSG00000169189.15	0.4	0.21-0.78	0.007
ENSG00000169213.6	2.03	1.35-3.03	0.001
ENSG00000169242.10	0.66	0.49-0.9	0.009
ENSG00000169247.10	119.02	8.84-1603.23	0
ENSG00000169291.8	0.56	0.41-0.77	0
ENSG00000169495.4	1.77	1.22-2.56	0.002
ENSG00000169509.5	1.64	1.18-2.27	0.003
ENSG00000169562.9	0.53	0.34-0.84	0.006
ENSG00000169598.14	0.45	0.26-0.81	0.007
ENSG00000169599.11	0.52	0.33-0.84	0.007
ENSG00000169689.13	0.48	0.28-0.83	0.008
ENSG00000169740.12	0.4	0.21-0.78	0.007
ENSG00000169762.15	0.11	0.03-0.38	0
ENSG00000169914.5	0.46	0.28-0.77	0.003
ENSG00000169951.8	0.31	0.14-0.66	0.003
ENSG00000169955.7	0.35	0.17-0.73	0.005
ENSG00000170279.2	10.63	3.19-35.38	0
ENSG00000170315.12	0.11	0.03-0.41	0.001
ENSG00000170412.15	0.49	0.31-0.76	0.001
ENSG00000170426.1	10.44	1.87-58.16	0.007
ENSG00000170581.12	3.27	1.44-7.41	0.005
ENSG00000170745.10	0.64	0.5-0.81	0
ENSG00000170779.10	1.62	1.12-2.33	0.009
ENSG00000170836.10	0.4	0.2-0.79	0.009
ENSG00000170909.12	1.58	1.12-2.23	0.009
ENSG00000171094.14	2.18	1.24-3.84	0.007
ENSG00000171462.13	2.22	1.5-3.29	0
ENSG00000171490.11	0.42	0.25-0.7	0.001
ENSG00000171532.4	6.87	2.24-21.13	0.001
ENSG00000171612.6	0.53	0.36-0.8	0.002
ENSG00000171840.10	0.65	0.48-0.88	0.005
ENSG00000171936.1	5.44	1.57-18.89	0.008
ENSG00000172057.8	0.37	0.21-0.65	0
ENSG00000172348.13	0.73	0.59-0.92	0.006
ENSG00000172456.15	0.16	0.06-0.41	0
ENSG00000172465.12	0.49	0.31-0.76	0.001
ENSG00000172548.13	2.68	1.39-5.17	0.003
ENSG00000172733.11	8.27	1.7-40.17	0.009
ENSG00000172765.15	5.48	1.69-17.76	0.005
ENSG00000172809.11	4.73	1.56-14.35	0.006
ENSG00000172890.10	3.64	1.42-9.34	0.007
ENSG00000173011.11	0.26	0.1-0.7	0.008
ENSG00000173013.5	0.53	0.33-0.84	0.008
ENSG00000173114.11	0.41	0.21-0.8	0.009
ENSG00000173320.8	0.55	0.35-0.86	0.009
ENSG00000173436.12	0.18	0.08-0.41	0
ENSG00000173457.9	2.01	1.23-3.3	0.006
ENSG00000173467.7	0.83	0.73-0.93	0.002
ENSG00000173531.14	0.49	0.3-0.81	0.006
ENSG00000173597.7	4.86	2.09-11.31	0
ENSG00000173598.12	17.17	2.28-129.2	0.006
ENSG00000173698.16	0.64	0.47-0.87	0.004
ENSG00000173812.9	0.2	0.07-0.59	0.003
ENSG00000173890.15	0.62	0.49-0.78	0
ENSG00000173928.2	0.37	0.19-0.7	0.003
ENSG00000173947.12	0.61	0.46-0.8	0
ENSG00000174628.15	0.23	0.08-0.68	0.008
ENSG00000174748.17	0.22	0.08-0.57	0.002
ENSG00000174807.3	1.85	1.25-2.73	0.002
ENSG00000174827.12	2.48	1.4-4.41	0.002
ENSG00000174945.12	4.84	1.6-14.6	0.005
ENSG00000175063.15	1.32	1.09-1.61	0.005
ENSG00000175193.11	2.6	1.31-5.18	0.006
ENSG00000175318.10	0.66	0.51-0.86	0.002
ENSG00000175348.9	0.5	0.31-0.82	0.005
ENSG00000175520.8	4.89	1.55-15.39	0.007
ENSG00000175592.7	1.49	1.15-1.92	0.003
ENSG00000175691.8	0.28	0.11-0.72	0.008
ENSG00000175745.10	0.67	0.5-0.89	0.005
ENSG00000175764.13	0.16	0.05-0.46	0.001
ENSG00000175874.8	5.98	1.82-19.63	0.003
ENSG00000176092.12	2.37	1.3-4.34	0.005
ENSG00000176170.12	1.69	1.21-2.34	0.002
ENSG00000176208.7	2.85	1.42-5.73	0.003
ENSG00000176566.4	4.5	1.89-10.73	0.001
ENSG00000176597.10	1.67	1.16-2.4	0.006
ENSG00000176749.7	2.16	1.27-3.66	0.004
ENSG00000176845.11	2.19	1.33-3.62	0.002
ENSG00000177098.7	0.63	0.48-0.83	0.001
ENSG00000177138.14	4.1	1.92-8.79	0
ENSG00000177426.19	2.87	1.47-5.63	0.002
ENSG00000177468.6	12.55	2.46-63.86	0.002
ENSG00000177494.5	1.47	1.18-1.83	0.001
ENSG00000177600.7	3.93	1.55-9.98	0.004
ENSG00000177706.8	4	1.48-10.82	0.006
ENSG00000177807.6	2.19	1.31-3.67	0.003
ENSG00000178096.8	0.49	0.3-0.8	0.005
ENSG00000178188.13	0.24	0.08-0.68	0.008
ENSG00000178449.7	0.47	0.27-0.83	0.009
ENSG00000178467.16	0.5	0.3-0.82	0.006
ENSG00000178776.4	1.39	1.12-1.72	0.003
ENSG00000178922.15	0.39	0.22-0.71	0.002
ENSG00000178980.13	0.48	0.29-0.8	0.005
ENSG00000178988.10	0.48	0.3-0.76	0.002
ENSG00000178999.11	1.71	1.21-2.41	0.003
ENSG00000179010.13	0.29	0.13-0.64	0.002
ENSG00000179023.8	0.51	0.31-0.84	0.008
ENSG00000179085.7	0.49	0.3-0.82	0.006
ENSG00000179178.9	0.75	0.64-0.89	0.001
ENSG00000179604.9	0.39	0.2-0.76	0.006
ENSG00000179918.16	0.31	0.16-0.57	0
ENSG00000180098.8	0.21	0.06-0.68	0.009
ENSG00000180354.14	0.52	0.32-0.85	0.008
ENSG00000180739.13	3.53	1.8-6.9	0
ENSG00000180787.5	0.43	0.28-0.65	0
ENSG00000181038.12	0.33	0.19-0.59	0
ENSG00000181192.10	0.41	0.22-0.78	0.006
ENSG00000181355.19	40.7	2.59-639.33	0.008
ENSG00000181541.5	21.6	2.37-196.48	0.006
ENSG00000181609.5	4.31	1.45-12.82	0.009
ENSG00000181610.11	0.32	0.17-0.59	0
ENSG00000181652.17	5.74	1.68-19.67	0.005
ENSG00000181666.16	0.09	0.02-0.43	0.002
ENSG00000182010.9	7.3	2.91-18.29	0
ENSG00000182093.13	0.49	0.33-0.72	0
ENSG00000182108.8	0.44	0.25-0.78	0.005
ENSG00000182187.3	5.46	1.58-18.94	0.007
ENSG00000182224.10	0.26	0.14-0.48	0
ENSG00000182261.3	7.12	2.47-20.57	0
ENSG00000182264.7	10.35	2.06-51.91	0.005
ENSG00000182551.12	0.39	0.2-0.75	0.005
ENSG00000182853.10	1.67	1.16-2.4	0.006
ENSG00000183044.10	0.52	0.34-0.79	0.002
ENSG00000183098.9	1.5	1.12-2.02	0.006
ENSG00000183172.8	0.28	0.12-0.63	0.002
ENSG00000183186.6	3.34	1.51-7.4	0.003
ENSG00000183386.8	3.14	1.51-6.56	0.002
ENSG00000183431.10	0.29	0.12-0.68	0.004
ENSG00000183579.14	0.6	0.43-0.83	0.002
ENSG00000183625.13	4.22	1.6-11.14	0.004
ENSG00000183726.9	0.39	0.23-0.66	0
ENSG00000183770.5	1.39	1.1-1.76	0.006
ENSG00000183856.9	2.91	1.35-6.27	0.006
ENSG00000184012.10	0.66	0.49-0.9	0.008
ENSG00000184076.12	0.35	0.18-0.71	0.003
ENSG00000184261.4	1.79	1.25-2.56	0.001
ENSG00000184465.14	12.05	2.27-64.08	0.004
ENSG00000184881.3	4.87	1.57-15.05	0.006
ENSG00000184937.11	1.87	1.32-2.65	0
ENSG00000184988.7	3.87	1.42-10.6	0.008
ENSG00000184995.7	3.95	1.48-10.53	0.006
ENSG00000185008.16	0.55	0.37-0.83	0.004
ENSG00000185010.12	0.57	0.41-0.79	0.001
ENSG00000185133.12	0.35	0.16-0.74	0.006
ENSG00000185187.11	0.46	0.28-0.77	0.003
ENSG00000185250.14	0.06	0.01-0.29	0.001
ENSG00000185437.12	0.39	0.21-0.73	0.003
ENSG00000185448.10	10.28	1.82-58.25	0.008
ENSG00000185519.8	5.24	1.61-17.02	0.006
ENSG00000185873.7	2.8	1.32-5.94	0.007
ENSG00000185900.8	3.98	1.77-8.98	0.001
ENSG00000185924.6	0.43	0.24-0.77	0.004
ENSG00000186104.9	0.3	0.12-0.74	0.009
ENSG00000186106.10	0.54	0.37-0.79	0.001
ENSG00000186185.12	1.39	1.11-1.74	0.004
ENSG00000186377.7	0.72	0.61-0.84	0
ENSG00000186431.17	7.58	1.8-31.9	0.006
ENSG00000186532.10	0.32	0.15-0.68	0.003
ENSG00000186638.14	4.53	2.06-9.94	0
ENSG00000186666.5	0.43	0.23-0.78	0.006
ENSG00000186919.11	5.39	1.57-18.58	0.008
ENSG00000187116.12	2.6	1.37-4.94	0.003
ENSG00000187242.4	6.04	1.72-21.25	0.005
ENSG00000187555.13	0.1	0.03-0.4	0.001
ENSG00000187624.8	0.57	0.41-0.8	0.001
ENSG00000187741.13	2.12	1.24-3.64	0.006
ENSG00000187840.4	1.46	1.13-1.88	0.003
ENSG00000188056.10	23.14	3.03-176.76	0.002
ENSG00000188293.5	1.44	1.12-1.86	0.004
ENSG00000188483.7	1.77	1.23-2.55	0.002
ENSG00000188542.8	0.35	0.17-0.71	0.004
ENSG00000188603.15	0.34	0.19-0.58	0
ENSG00000188739.13	3.76	1.43-9.89	0.007
ENSG00000188766.11	2.75	1.3-5.78	0.008
ENSG00000188783.5	0.62	0.44-0.88	0.007
ENSG00000188910.7	1.92	1.3-2.83	0.001
ENSG00000188938.14	0.09	0.03-0.31	0
ENSG00000188959.9	0.73	0.62-0.86	0
ENSG00000189120.4	2.16	1.46-3.2	0
ENSG00000189377.7	0.77	0.66-0.9	0.001
ENSG00000189410.10	3.54	1.59-7.91	0.002
ENSG00000196118.10	0.41	0.22-0.76	0.005
ENSG00000196368.4	1.89	1.27-2.81	0.002
ENSG00000196428.11	4.78	1.59-14.4	0.005
ENSG00000196526.9	2.79	1.41-5.54	0.003
ENSG00000196547.13	0.39	0.2-0.79	0.009
ENSG00000196569.10	0.49	0.29-0.81	0.005
ENSG00000196588.13	5.08	1.52-16.96	0.008
ENSG00000196704.10	0.48	0.28-0.82	0.007
ENSG00000196743.7	2.55	1.33-4.9	0.005
ENSG00000196839.11	1.72	1.15-2.56	0.008
ENSG00000196923.12	2.61	1.27-5.38	0.009
ENSG00000196935.7	3.23	1.76-5.93	0
ENSG00000196975.13	0.59	0.42-0.83	0.002
ENSG00000197102.9	7.25	1.83-28.74	0.005
ENSG00000197140.13	23.25	3.22-168.15	0.002
ENSG00000197142.9	0.75	0.6-0.92	0.007
ENSG00000197309.2	26.55	4.08-172.88	0.001
ENSG00000197430.9	9.4	2.27-38.86	0.002
ENSG00000197483.9	2.51	1.59-3.94	0
ENSG00000197594.10	2.03	1.26-3.26	0.004
ENSG00000197714.7	52.42	4.07-675.54	0.002
ENSG00000197779.12	13.83	2.21-86.49	0.005
ENSG00000197798.7	0.32	0.15-0.69	0.004
ENSG00000197849.5	6	1.87-19.3	0.003
ENSG00000197894.9	0.49	0.31-0.8	0.004
ENSG00000197905.7	1.85	1.23-2.78	0.003
ENSG00000198034.9	0.18	0.05-0.65	0.009
ENSG00000198258.9	0.35	0.17-0.75	0.007
ENSG00000198270.11	0.21	0.07-0.61	0.004
ENSG00000198589.9	0.52	0.34-0.77	0.001
ENSG00000198673.9	6.18	1.71-22.42	0.006
ENSG00000198722.11	0.6	0.44-0.82	0.001
ENSG00000198755.9	0.17	0.06-0.44	0
ENSG00000198768.9	2.4	1.62-3.56	0
ENSG00000198785.4	5.84	1.99-17.18	0.001
ENSG00000198846.5	0.4	0.24-0.66	0
ENSG00000198853.10	3.14	1.42-6.93	0.005
ENSG00000198863.6	0.31	0.13-0.73	0.008
ENSG00000198874.11	0.31	0.15-0.62	0.001
ENSG00000198894.6	0.56	0.36-0.86	0.008
ENSG00000198901.12	1.37	1.08-1.75	0.009
ENSG00000203724.9	0.64	0.46-0.88	0.006
ENSG00000203737.3	4.65	1.88-11.5	0.001
ENSG00000203783.4	8.66	1.82-41.27	0.007
ENSG00000203805.9	1.33	1.1-1.61	0.003
ENSG00000204084.11	0.21	0.08-0.55	0.001
ENSG00000204178.8	0.3	0.18-0.5	0
ENSG00000204219.8	0.43	0.28-0.66	0
ENSG00000204385.9	0.59	0.45-0.77	0
ENSG00000204428.11	0.5	0.3-0.82	0.006
ENSG00000204577.10	2.17	1.28-3.67	0.004
ENSG00000204655.10	141.73	12.38-1622.78	0
ENSG00000204711.7	0.61	0.44-0.86	0.004
ENSG00000204815.7	0.42	0.25-0.71	0.001
ENSG00000204880.7	8.52	1.77-40.99	0.007
ENSG00000204941.12	7.02	2.37-20.76	0
ENSG00000204956.5	4.25	1.63-11.05	0.003
ENSG00000205084.9	0.63	0.46-0.86	0.003
ENSG00000205085.7	3.28	1.34-8.06	0.009
ENSG00000205835.7	5.47	1.65-18.16	0.005
ENSG00000211452.9	0.46	0.27-0.79	0.005
ENSG00000212722.7	4.22	1.53-11.61	0.005
ENSG00000213420.6	4.36	1.89-10.05	0.001
ENSG00000213462.4	3.35	1.81-6.22	0
ENSG00000213853.8	0.53	0.34-0.81	0.003
ENSG00000213995.10	0.24	0.12-0.49	0
ENSG00000214046.7	0.3	0.14-0.68	0.004
ENSG00000214941.6	0.23	0.11-0.48	0
ENSG00000214944.8	0.46	0.27-0.78	0.004
ENSG00000215251.3	0.44	0.27-0.72	0.001
ENSG00000215910.6	4.4	1.49-13.05	0.007
ENSG00000218336.6	3.67	1.47-9.16	0.005
ENSG00000218891.4	3.56	1.75-7.23	0
ENSG00000219073.6	5.31	1.75-16.09	0.003
ENSG00000219481.9	0.4	0.21-0.77	0.006
ENSG00000219626.7	0.39	0.2-0.76	0.005
ENSG00000221880.3	12.8	2.7-60.77	0.001
ENSG00000221955.9	1.56	1.13-2.16	0.007
ENSG00000225614.2	1.99	1.38-2.86	0
ENSG00000228083.2	7.95	2.16-29.25	0.002
ENSG00000232388.4	0.43	0.25-0.76	0.004
ENSG00000234284.5	0.38	0.19-0.79	0.009
ENSG00000234511.7	5.21	2.08-13.06	0
ENSG00000235711.4	8.2	1.7-39.54	0.009
ENSG00000239998.4	1.98	1.34-2.9	0.001
ENSG00000240184.5	14.48	2.72-77.02	0.002
ENSG00000243137.6	2.12	1.28-3.53	0.004
ENSG00000243667.5	0.3	0.12-0.71	0.007
ENSG00000244482.8	2.9	1.57-5.36	0.001
ENSG00000245680.8	0.26	0.12-0.61	0.002
ENSG00000245848.2	0.68	0.52-0.88	0.004
ENSG00000248329.4	1.4	1.09-1.79	0.009
ENSG00000248746.4	5.12	1.66-15.73	0.004
ENSG00000249242.6	0.67	0.49-0.9	0.008
ENSG00000249992.1	1.3	1.08-1.56	0.005
ENSG00000250254.1	11.04	2.15-56.73	0.004
ENSG00000250317.7	0.54	0.35-0.84	0.006
ENSG00000253313.4	0.61	0.46-0.8	0
ENSG00000253846.2	2.71	1.31-5.6	0.007
ENSG00000255501.1	2.88	1.41-5.9	0.004
ENSG00000258818.3	0.71	0.54-0.91	0.008
ENSG00000261459.1	0.35	0.17-0.73	0.005
ENSG00000261832.3	0.34	0.19-0.58	0
ENSG00000264424.1	7.35	1.76-30.75	0.006
ENSG00000265203.1	4.53	1.56-13.09	0.005
ENSG00000265241.5	0.28	0.13-0.62	0.002
ENSG00000265264.4	0.26	0.11-0.6	0.002
ENSG00000266524.2	0.61	0.44-0.86	0.004
ENSG00000267059.2	0.21	0.06-0.65	0.007
ENSG00000267795.4	0.65	0.49-0.85	0.002
ENSG00000268089.2	4.9	1.54-15.59	0.007
ENSG00000269743.2	16.9	2-142.8	0.009
ENSG00000269858.4	6.64	1.86-23.64	0.003
ENSG00000273559.3	0.25	0.09-0.69	0.007
ENSG00000273611.3	0.55	0.36-0.83	0.005
ENSG00000274211.3	0.39	0.2-0.74	0.004
ENSG00000274750.1	2.6	1.32-5.13	0.006
ENSG00000276043.3	1.44	1.12-1.85	0.004
ENSG00000276966.1	3.08	1.38-6.87	0.006
ENSG00000277157.1	3.99	1.65-9.63	0.002
ENSG00000278463.1	4.96	1.63-15.06	0.005
ENSG00000278845.3	0.34	0.17-0.71	0.004
ENSG00000279362.1	3.02	1.38-6.62	0.006

## Sheet: Supplement Table 3
	GSE50081_DFS
gene_id	Hazard.Ratio	CI95	P.Value
ENSG00000000457.12	0.48	0.26-0.88	0.017
ENSG00000001461.15	0.33	0.13-0.85	0.022
ENSG00000001561.6	0.66	0.48-0.92	0.015
ENSG00000001617.10	1.87	1.09-3.2	0.024
ENSG00000001626.13	0.23	0.06-0.9	0.035
ENSG00000002586.16	1.79	1.06-3.04	0.03
ENSG00000003402.18	0.46	0.22-0.95	0.037
ENSG00000004779.8	0.37	0.19-0.71	0.003
ENSG00000004948.12	7.5	1.26-44.62	0.027
ENSG00000005022.5	0.51	0.3-0.89	0.017
ENSG00000005187.10	0.49	0.29-0.81	0.006
ENSG00000005243.8	2.13	1.19-3.8	0.01
ENSG00000005471.14	3.64	1.41-9.42	0.008
ENSG00000005801.15	0.54	0.31-0.95	0.033
ENSG00000005812.9	0.47	0.27-0.83	0.008
ENSG00000006007.10	0.53	0.33-0.85	0.008
ENSG00000006042.10	0.7	0.5-0.98	0.038
ENSG00000006459.9	0.58	0.34-1	0.048
ENSG00000006606.7	1.69	1.23-2.33	0.001
ENSG00000006638.10	3.84	1.56-9.43	0.003
ENSG00000006659.11	4.51	1.26-16.07	0.02
ENSG00000006740.15	0.57	0.37-0.88	0.01
ENSG00000006757.10	0.52	0.28-0.97	0.039
ENSG00000007001.11	41.49	3.66-470.77	0.003
ENSG00000007968.6	3.04	1.02-9.07	0.047
ENSG00000008056.11	4.23	1.81-9.87	0.001
ENSG00000008853.15	0.62	0.42-0.92	0.017
ENSG00000008869.10	0.46	0.31-0.7	0
ENSG00000008952.15	0.57	0.37-0.88	0.011
ENSG00000009780.14	0.18	0.05-0.68	0.012
ENSG00000010539.10	0.43	0.21-0.9	0.025
ENSG00000011007.11	0.16	0.03-0.85	0.032
ENSG00000011021.20	0.42	0.18-0.98	0.044
ENSG00000011028.12	2.69	1.28-5.62	0.009
ENSG00000011105.10	2.15	1-4.58	0.049
ENSG00000011275.17	5.34	1.16-24.64	0.032
ENSG00000011295.14	0.55	0.35-0.85	0.007
ENSG00000011304.15	4.97	1.05-23.51	0.043
ENSG00000011451.16	3.65	1.16-11.47	0.027
ENSG00000011638.9	0.66	0.44-0.98	0.041
ENSG00000013016.13	2.92	1.06-8	0.038
ENSG00000014641.16	0.53	0.32-0.87	0.012
ENSG00000015285.9	3.02	1.08-8.42	0.035
ENSG00000015413.8	2.22	1.22-4.07	0.009
ENSG00000015676.16	4.03	1.05-15.49	0.043
ENSG00000016082.13	1.81	1.14-2.85	0.011
ENSG00000017483.13	1.86	1.22-2.84	0.004
ENSG00000018699.10	0.3	0.1-0.92	0.035
ENSG00000019549.7	1.34	1-1.8	0.048
ENSG00000019995.6	0.49	0.24-0.99	0.046
ENSG00000020181.16	2.22	1.18-4.17	0.014
ENSG00000020577.12	2.09	1.06-4.13	0.034
ENSG00000021574.10	0.53	0.29-0.96	0.038
ENSG00000021776.9	0.34	0.16-0.72	0.005
ENSG00000023041.10	0.4	0.22-0.72	0.002
ENSG00000023330.13	0.48	0.27-0.86	0.014
ENSG00000023734.9	1.98	1.12-3.47	0.018
ENSG00000024862.15	0.42	0.28-0.62	0
ENSG00000025423.10	0.76	0.62-0.92	0.005
ENSG00000025708.11	1.73	1.01-2.96	0.045
ENSG00000025796.12	0.44	0.24-0.8	0.007
ENSG00000026559.12	2.39	1.05-5.45	0.038
ENSG00000026652.12	2.11	1.03-4.34	0.042
ENSG00000027644.4	13.66	2.65-70.34	0.002
ENSG00000027869.10	1.77	1.07-2.93	0.027
ENSG00000028528.13	0.18	0.07-0.46	0
ENSG00000029559.6	1.52	1.05-2.19	0.027
ENSG00000032742.16	0.34	0.17-0.68	0.002
ENSG00000033122.17	104.13	2.34-4632.55	0.016
ENSG00000034693.13	0.42	0.19-0.91	0.028
ENSG00000035664.10	0.46	0.26-0.81	0.007
ENSG00000035687.9	0.36	0.15-0.85	0.021
ENSG00000035862.11	1.84	1.06-3.21	0.031
ENSG00000035928.13	0.23	0.1-0.52	0
ENSG00000036257.11	0.46	0.25-0.85	0.014
ENSG00000036828.12	3.72	1.18-11.73	0.025
ENSG00000038382.16	2.46	1.01-5.98	0.048
ENSG00000038427.14	1.38	1.04-1.83	0.025
ENSG00000039139.9	0.5	0.25-0.97	0.041
ENSG00000039523.16	3.03	1.11-8.28	0.031
ENSG00000039600.9	2.27	1.03-5.02	0.043
ENSG00000040341.16	0.42	0.18-0.97	0.042
ENSG00000040731.9	4.63	1.14-18.91	0.033
ENSG00000042813.6	8.17	1.19-56.36	0.033
ENSG00000042832.10	2.88	1.03-8.02	0.043
ENSG00000046647.12	0.47	0.22-0.99	0.046
ENSG00000046653.13	0.62	0.41-0.94	0.026
ENSG00000046774.9	1.81	1.15-2.83	0.01
ENSG00000047315.13	0.39	0.19-0.79	0.009
ENSG00000047346.11	0.53	0.32-0.86	0.011
ENSG00000047410.12	0.43	0.19-0.97	0.042
ENSG00000047849.20	4.88	1.63-14.58	0.005
ENSG00000048140.16	4	1.33-12.05	0.014
ENSG00000048471.12	3.45	1.47-8.12	0.004
ENSG00000048545.12	5.98	2.1-17.03	0.001
ENSG00000049130.12	0.26	0.12-0.6	0.001
ENSG00000049192.13	3.49	1.32-9.26	0.012
ENSG00000049247.12	1.82	1.12-2.96	0.015
ENSG00000049759.15	0.61	0.43-0.85	0.004
ENSG00000050393.10	0.4	0.23-0.68	0.001
ENSG00000050426.14	0.32	0.15-0.68	0.003
ENSG00000050628.19	6.3	1.33-29.84	0.02
ENSG00000050748.16	0.42	0.22-0.81	0.009
ENSG00000050820.15	4	2.03-7.9	0
ENSG00000051341.12	1.55	1.02-2.35	0.039
ENSG00000052344.14	0.73	0.56-0.96	0.024
ENSG00000052749.12	9.64	2.5-37.17	0.001
ENSG00000053702.13	3.19	1.28-7.94	0.013
ENSG00000053900.9	0.59	0.36-0.97	0.036
ENSG00000053918.14	0.52	0.28-0.98	0.043
ENSG00000054179.10	2.39	1.25-4.61	0.009
ENSG00000054282.14	0.28	0.11-0.73	0.009
ENSG00000054356.12	3.4	1.72-6.72	0
ENSG00000055130.14	0.41	0.17-0.99	0.047
ENSG00000055211.11	0.53	0.34-0.84	0.007
ENSG00000055917.14	0.47	0.24-0.91	0.026
ENSG00000057252.11	0.55	0.34-0.9	0.017
ENSG00000057663.11	0.59	0.37-0.95	0.03
ENSG00000057935.12	0.32	0.11-0.96	0.042
ENSG00000058085.13	1.63	1.13-2.35	0.008
ENSG00000059588.8	0.39	0.2-0.77	0.006
ENSG00000059728.9	1.72	1.03-2.88	0.039
ENSG00000059804.14	1.49	1.08-2.05	0.016
ENSG00000059915.15	4.01	1.54-10.48	0.004
ENSG00000060138.11	2.37	1.03-5.47	0.044
ENSG00000060718.17	1.22	1.03-1.43	0.018
ENSG00000060762.17	0.09	0.02-0.34	0
ENSG00000061337.14	5.12	1.55-16.93	0.007
ENSG00000062038.12	1.28	1.02-1.6	0.036
ENSG00000062096.13	4.41	1.14-17.09	0.032
ENSG00000062194.14	0.72	0.52-0.99	0.045
ENSG00000062282.13	0.55	0.33-0.92	0.024
ENSG00000062725.8	0.5	0.26-0.96	0.037
ENSG00000063046.16	0.32	0.14-0.71	0.005
ENSG00000063660.7	1.98	1.29-3.03	0.002
ENSG00000063761.14	2.81	1.14-6.91	0.024
ENSG00000063854.11	0.39	0.17-0.89	0.025
ENSG00000064042.16	0.72	0.53-0.98	0.035
ENSG00000065154.10	0.62	0.41-0.94	0.024
ENSG00000065559.13	0.53	0.31-0.9	0.018
ENSG00000065613.12	0.63	0.43-0.94	0.022
ENSG00000066027.10	0.26	0.1-0.64	0.003
ENSG00000066185.11	0.58	0.38-0.88	0.012
ENSG00000066651.16	0.66	0.45-0.99	0.044
ENSG00000066654.11	0.64	0.45-0.92	0.015
ENSG00000066926.9	0.33	0.14-0.79	0.012
ENSG00000067057.15	2.96	1.51-5.8	0.002
ENSG00000067167.6	0.59	0.36-0.96	0.035
ENSG00000067208.13	0.36	0.14-0.96	0.042
ENSG00000067225.16	2.56	1.19-5.49	0.016
ENSG00000067248.8	0.66	0.47-0.94	0.021
ENSG00000067704.9	0.66	0.44-0.99	0.042
ENSG00000068489.11	2.91	1.58-5.36	0.001
ENSG00000068650.17	0.56	0.33-0.95	0.033
ENSG00000068697.6	0.38	0.17-0.86	0.02
ENSG00000068784.11	0.49	0.28-0.84	0.01
ENSG00000068885.13	0.43	0.23-0.81	0.009
ENSG00000068912.12	0.43	0.2-0.94	0.034
ENSG00000069011.14	1.35	1.02-1.77	0.035
ENSG00000069509.5	0.51	0.33-0.8	0.003
ENSG00000070061.13	0.3	0.12-0.74	0.009
ENSG00000070081.14	0.58	0.35-0.98	0.041
ENSG00000070159.12	0.44	0.22-0.84	0.014
ENSG00000070182.16	1.53	1.05-2.25	0.028
ENSG00000070371.14	2.07	1.05-4.08	0.036
ENSG00000070501.10	0.26	0.1-0.68	0.006
ENSG00000070526.13	0.85	0.73-1	0.043
ENSG00000070610.13	0.26	0.09-0.7	0.008
ENSG00000070808.14	7.46	1.62-34.33	0.01
ENSG00000071189.20	0.37	0.14-0.96	0.041
ENSG00000071246.9	2.49	1.14-5.44	0.022
ENSG00000071282.10	2.55	1.23-5.31	0.012
ENSG00000071564.13	4.23	1.29-13.91	0.017
ENSG00000071677.1	2.78	1.22-6.36	0.015
ENSG00000072042.11	3.05	1.04-8.92	0.042
ENSG00000072110.12	4.14	1.85-9.3	0.001
ENSG00000072163.17	1.96	1.03-3.75	0.041
ENSG00000072182.11	5.41	1.53-19.17	0.009
ENSG00000072210.17	0.57	0.35-0.92	0.022
ENSG00000072364.11	3.44	1.09-10.92	0.036
ENSG00000072832.13	1.74	1.16-2.6	0.007
ENSG00000072849.9	0.33	0.13-0.85	0.022
ENSG00000073417.13	0.29	0.11-0.76	0.012
ENSG00000073584.17	0.36	0.18-0.72	0.004
ENSG00000073792.14	1.7	1.03-2.79	0.036
ENSG00000073969.17	3.93	1.45-10.64	0.007
ENSG00000074047.19	2.77	1.41-5.42	0.003
ENSG00000074181.7	2.83	1.22-6.52	0.015
ENSG00000074527.10	0.7	0.54-0.9	0.005
ENSG00000074590.12	1.56	1.1-2.22	0.013
ENSG00000074621.12	0.16	0.03-0.84	0.03
ENSG00000075089.8	0.43	0.2-0.92	0.029
ENSG00000075218.17	1.79	1.12-2.86	0.014
ENSG00000075239.12	0.12	0.03-0.46	0.002
ENSG00000075388.3	4.11	1.02-16.53	0.046
ENSG00000075391.15	10.24	3.25-32.29	0
ENSG00000075420.11	3.44	1.07-11.12	0.039
ENSG00000075426.10	2.47	1.37-4.44	0.003
ENSG00000075618.16	1.83	1.33-2.51	0
ENSG00000075891.20	6.09	1.37-27	0.018
ENSG00000075945.11	0.57	0.37-0.87	0.01
ENSG00000076108.10	4.12	1.35-12.64	0.013
ENSG00000076201.13	4.31	1.43-12.97	0.009
ENSG00000076242.13	0.46	0.22-0.95	0.036
ENSG00000076554.14	0.49	0.3-0.79	0.004
ENSG00000076928.16	3.58	1.81-7.06	0
ENSG00000076984.16	5.72	1.79-18.27	0.003
ENSG00000077097.12	0.64	0.42-0.97	0.034
ENSG00000077458.11	0.28	0.08-0.97	0.045
ENSG00000078114.17	0.52	0.27-0.99	0.045
ENSG00000078269.12	8.4	2.43-29.06	0.001
ENSG00000078295.14	3.05	1.35-6.88	0.007
ENSG00000078596.9	0.66	0.45-0.95	0.027
ENSG00000078898.6	1.33	1.04-1.7	0.021
ENSG00000079101.15	0.35	0.12-0.99	0.049
ENSG00000079156.15	0.35	0.15-0.82	0.015
ENSG00000079482.12	4.38	1.1-17.4	0.036
ENSG00000079557.4	6.78	1.16-39.63	0.034
ENSG00000079616.11	0.42	0.19-0.93	0.033
ENSG00000079689.12	2.33	1.14-4.78	0.021
ENSG00000079691.16	0.28	0.09-0.85	0.025
ENSG00000080031.8	1.5	1.04-2.17	0.032
ENSG00000080572.11	0.21	0.06-0.83	0.025
ENSG00000080573.6	2.01	1.38-2.93	0
ENSG00000080644.14	3.52	1.01-12.21	0.047
ENSG00000080845.16	3.15	1.38-7.21	0.007
ENSG00000081059.18	2.46	1.06-5.68	0.036
ENSG00000081803.14	0.57	0.37-0.86	0.008
ENSG00000082068.7	0.45	0.21-0.95	0.036
ENSG00000082146.11	0.39	0.2-0.75	0.005
ENSG00000082196.19	1.69	1.08-2.64	0.022
ENSG00000082258.11	0.44	0.2-0.97	0.041
ENSG00000082438.14	0.15	0.05-0.49	0.002
ENSG00000082781.10	2.13	1.2-3.8	0.01
ENSG00000082805.18	3.54	1.07-11.67	0.038
ENSG00000082996.18	0.65	0.44-0.97	0.037
ENSG00000083093.8	0.49	0.28-0.85	0.011
ENSG00000083290.18	0.3	0.11-0.78	0.014
ENSG00000083444.15	2.62	1.43-4.78	0.002
ENSG00000083457.10	0.53	0.29-0.98	0.044
ENSG00000083520.13	0.4	0.19-0.86	0.018
ENSG00000083535.14	0.4	0.22-0.75	0.004
ENSG00000083544.12	0.41	0.19-0.89	0.025
ENSG00000084112.13	7.95	2.45-25.72	0.001
ENSG00000084234.15	0.56	0.31-0.99	0.045
ENSG00000084453.15	32.76	2.9-369.92	0.005
ENSG00000084636.16	1.63	1.03-2.57	0.037
ENSG00000084676.14	0.37	0.21-0.68	0.001
ENSG00000084710.12	3.79	1.22-11.8	0.022
ENSG00000085063.13	0.58	0.36-0.92	0.021
ENSG00000085760.13	0.6	0.41-0.9	0.012
ENSG00000085871.7	0.46	0.22-0.97	0.042
ENSG00000085872.13	9.44	2.28-39.12	0.002
ENSG00000085982.12	0.5	0.25-1	0.049
ENSG00000086475.13	0.33	0.13-0.83	0.018
ENSG00000086712.11	0.38	0.19-0.79	0.009
ENSG00000086717.17	1.95	1.23-3.09	0.005
ENSG00000087116.12	2.47	1.34-4.55	0.004
ENSG00000087128.8	1.3	1.03-1.63	0.026
ENSG00000087157.17	0.23	0.09-0.63	0.004
ENSG00000087206.15	0.28	0.11-0.75	0.011
ENSG00000087245.11	3.8	1.12-12.92	0.033
ENSG00000087338.4	0.57	0.36-0.89	0.014
ENSG00000087365.13	11.35	2.31-55.61	0.003
ENSG00000088035.14	0.41	0.25-0.66	0
ENSG00000088179.7	0.38	0.15-0.94	0.036
ENSG00000088205.11	0.61	0.38-0.97	0.036
ENSG00000088247.14	4.52	1.44-14.19	0.01
ENSG00000088448.13	0.26	0.08-0.87	0.028
ENSG00000088727.11	0.37	0.15-0.94	0.036
ENSG00000088766.10	0.19	0.08-0.45	0
ENSG00000088812.16	0.48	0.26-0.87	0.017
ENSG00000088826.16	4.66	1.77-12.29	0.002
ENSG00000088882.7	1.7	1.23-2.35	0.001
ENSG00000089009.14	0.39	0.22-0.71	0.002
ENSG00000089050.13	0.07	0.01-0.46	0.006
ENSG00000089063.13	0.45	0.29-0.71	0
ENSG00000089123.14	0.29	0.1-0.82	0.02
ENSG00000089177.16	0.44	0.25-0.79	0.006
ENSG00000089195.13	0.46	0.26-0.8	0.007
ENSG00000089220.4	0.43	0.2-0.9	0.025
ENSG00000089250.17	2.1	1.21-3.63	0.008
ENSG00000089916.16	4.92	1.76-13.73	0.002
ENSG00000090013.8	0.59	0.36-0.97	0.039
ENSG00000090061.16	2.87	1.09-7.58	0.034
ENSG00000090263.14	0.4	0.19-0.84	0.016
ENSG00000090266.11	0.22	0.06-0.75	0.016
ENSG00000090863.10	3.03	1.13-8.07	0.027
ENSG00000090924.13	2.96	1.6-5.45	0.001
ENSG00000090975.11	3.4	1.05-11.03	0.041
ENSG00000090989.16	0.58	0.39-0.87	0.009
ENSG00000091583.9	0.62	0.4-0.97	0.036
ENSG00000091640.6	0.26	0.08-0.84	0.024
ENSG00000091651.7	1.67	1.16-2.4	0.005
ENSG00000091656.14	2.07	1.01-4.22	0.046
ENSG00000092096.13	3.77	1.52-9.38	0.004
ENSG00000092529.21	0.58	0.36-0.92	0.022
ENSG00000092853.12	6.74	1.16-39.22	0.034
ENSG00000092871.15	24.7	3.14-194.18	0.002
ENSG00000093144.17	0.61	0.38-0.98	0.039
ENSG00000094963.12	0.69	0.52-0.93	0.014
ENSG00000094975.12	0.65	0.45-0.93	0.019
ENSG00000095321.15	2.88	1.13-7.31	0.026
ENSG00000095574.10	0.35	0.14-0.86	0.022
ENSG00000095752.5	1.65	1.08-2.51	0.021
ENSG00000096088.15	0.85	0.73-0.99	0.038
ENSG00000096264.12	14.59	2.61-81.45	0.002
ENSG00000096384.18	0.54	0.31-0.94	0.03
ENSG00000096401.7	0.23	0.07-0.75	0.015
ENSG00000097096.8	0.11	0.02-0.56	0.008
ENSG00000099331.12	4.38	1.34-14.27	0.014
ENSG00000099625.11	4.15	1.1-15.62	0.035
ENSG00000099721.12	4.07	1.01-16.34	0.048
ENSG00000099814.14	2.39	1.02-5.63	0.045
ENSG00000099849.13	0.51	0.29-0.92	0.024
ENSG00000099917.16	3.26	1.33-7.95	0.01
ENSG00000099953.8	1.44	1.05-1.95	0.021
ENSG00000099985.3	1.83	1.11-3.02	0.018
ENSG00000099999.13	3.81	1.05-13.8	0.042
ENSG00000100031.17	6.79	2-23.02	0.002
ENSG00000100034.12	3.42	1.26-9.25	0.016
ENSG00000100077.13	0.4	0.2-0.8	0.01
ENSG00000100097.10	2.23	1.18-4.21	0.014
ENSG00000100121.11	5.1	1.74-14.9	0.003
ENSG00000100150.15	0.26	0.08-0.92	0.036
ENSG00000100206.8	5.86	1.48-23.25	0.012
ENSG00000100302.6	2.33	1.13-4.81	0.022
ENSG00000100307.11	0.59	0.37-0.93	0.024
ENSG00000100311.15	5.38	1.75-16.51	0.003
ENSG00000100341.10	3.2	1.1-9.25	0.032
ENSG00000100345.19	2.4	1.08-5.31	0.031
ENSG00000100346.16	5.36	1.81-15.86	0.002
ENSG00000100372.13	0.33	0.12-0.88	0.027
ENSG00000100379.16	12.7	2.8-57.55	0.001
ENSG00000100380.11	0.57	0.34-0.93	0.023
ENSG00000100387.8	0.41	0.21-0.79	0.008
ENSG00000100399.14	0.32	0.12-0.85	0.023
ENSG00000100403.11	6.45	1.1-37.85	0.039
ENSG00000100417.10	0.5	0.31-0.82	0.006
ENSG00000100429.16	5.7	1.17-27.76	0.031
ENSG00000100442.9	4.61	1.82-11.64	0.001
ENSG00000100490.8	0.16	0.03-0.8	0.026
ENSG00000100558.7	1.59	1.05-2.42	0.03
ENSG00000100593.16	5.73	1.72-19.02	0.004
ENSG00000100599.14	6.44	2.08-19.93	0.001
ENSG00000100605.15	4.84	1.32-17.75	0.018
ENSG00000100652.4	4.63	1.58-13.55	0.005
ENSG00000100934.13	1.81	1.01-3.23	0.046
ENSG00000101019.20	0.16	0.04-0.73	0.018
ENSG00000101052.11	0.36	0.14-0.93	0.036
ENSG00000101191.15	0.33	0.12-0.94	0.038
ENSG00000101203.15	19.79	1.44-272.11	0.026
ENSG00000101290.12	0.28	0.09-0.9	0.032
ENSG00000101306.9	3.74	1.11-12.56	0.033
ENSG00000101307.14	2.99	1.01-8.84	0.048
ENSG00000101310.13	0.4	0.22-0.73	0.003
ENSG00000101343.13	0.54	0.35-0.83	0.005
ENSG00000101417.10	0.53	0.32-0.88	0.013
ENSG00000101435.4	15.51	1.84-130.96	0.012
ENSG00000101438.3	10.92	1.08-110.85	0.043
ENSG00000101439.7	0.33	0.14-0.74	0.007
ENSG00000101442.9	0.34	0.14-0.84	0.019
ENSG00000101443.16	0.6	0.39-0.91	0.016
ENSG00000101446.7	5.93	1.26-27.81	0.024
ENSG00000101463.5	1.43	1.08-1.87	0.011
ENSG00000101489.17	2.24	1.02-4.91	0.045
ENSG00000101639.17	0.44	0.23-0.84	0.012
ENSG00000101751.9	0.44	0.24-0.83	0.01
ENSG00000101773.15	0.67	0.47-0.97	0.034
ENSG00000101825.7	1.42	1.04-1.94	0.026
ENSG00000101856.9	0.48	0.29-0.78	0.003
ENSG00000101882.8	0.54	0.31-0.95	0.032
ENSG00000101888.10	0.49	0.25-0.96	0.038
ENSG00000101901.9	0.42	0.19-0.91	0.029
ENSG00000101938.13	0.73	0.57-0.93	0.011
ENSG00000101977.18	11.76	2.13-64.97	0.005
ENSG00000102007.9	1.87	1.06-3.29	0.03
ENSG00000102034.15	2.08	1.06-4.06	0.032
ENSG00000102078.14	0.3	0.1-0.88	0.028
ENSG00000102189.15	0.35	0.15-0.86	0.023
ENSG00000102241.10	0.44	0.22-0.88	0.02
ENSG00000102265.10	2.22	1-4.91	0.049
ENSG00000102302.7	1.79	1.16-2.75	0.008
ENSG00000102309.11	0.27	0.08-0.89	0.032
ENSG00000102359.5	1.95	1.17-3.27	0.011
ENSG00000102409.9	0.72	0.54-0.96	0.023
ENSG00000102531.15	0.31	0.1-0.99	0.048
ENSG00000102547.17	0.3	0.12-0.75	0.01
ENSG00000102580.13	0.53	0.31-0.93	0.026
ENSG00000102699.5	0.52	0.33-0.81	0.004
ENSG00000102710.18	0.41	0.17-0.97	0.041
ENSG00000102738.7	0.21	0.07-0.63	0.006
ENSG00000102763.14	0.45	0.22-0.92	0.028
ENSG00000102786.13	0.4	0.19-0.88	0.023
ENSG00000102802.8	2.44	1.27-4.69	0.007
ENSG00000102804.13	0.15	0.05-0.51	0.002
ENSG00000102805.12	0.48	0.29-0.82	0.007
ENSG00000102897.8	0.35	0.21-0.59	0
ENSG00000102977.12	2.48	1.26-4.86	0.008
ENSG00000103042.7	4.17	1.74-9.97	0.001
ENSG00000103043.13	6.44	1.83-22.69	0.004
ENSG00000103257.7	1.49	1.08-2.05	0.015
ENSG00000103264.14	3.37	1.35-8.4	0.009
ENSG00000103316.9	0.74	0.59-0.93	0.01
ENSG00000103335.18	6.9	2.35-20.28	0
ENSG00000103342.11	0.26	0.1-0.66	0.004
ENSG00000103351.11	0.25	0.08-0.73	0.011
ENSG00000103489.10	2.41	1.24-4.7	0.01
ENSG00000103510.18	0.2	0.07-0.57	0.003
ENSG00000103546.17	13.77	2.17-87.17	0.005
ENSG00000103653.15	2.57	1.22-5.4	0.013
ENSG00000103671.8	0.55	0.31-0.99	0.045
ENSG00000103742.10	1.44	1.03-2.01	0.034
ENSG00000103811.14	0.6	0.41-0.87	0.007
ENSG00000103855.16	6.22	2.36-16.39	0
ENSG00000103978.14	0.41	0.2-0.84	0.014
ENSG00000103994.15	0.37	0.19-0.71	0.003
ENSG00000104131.11	0.62	0.4-0.96	0.032
ENSG00000104142.9	4.87	1.59-14.95	0.006
ENSG00000104219.11	0.5	0.26-0.98	0.043
ENSG00000104361.8	0.19	0.06-0.65	0.008
ENSG00000104365.12	0.35	0.16-0.75	0.007
ENSG00000104369.4	0.6	0.36-0.98	0.042
ENSG00000104371.4	1.77	1.1-2.86	0.019
ENSG00000104375.14	0.37	0.16-0.83	0.016
ENSG00000104450.11	0.71	0.52-0.97	0.031
ENSG00000104517.11	0.57	0.34-0.95	0.03
ENSG00000104611.10	0.47	0.27-0.83	0.008
ENSG00000104635.12	3.73	1.47-9.46	0.006
ENSG00000104671.6	0.52	0.28-0.95	0.034
ENSG00000104722.12	2.41	1.17-4.94	0.016
ENSG00000104728.14	2.08	1.09-3.98	0.027
ENSG00000104763.16	0.42	0.23-0.76	0.004
ENSG00000104823.7	0.36	0.13-0.99	0.049
ENSG00000104848.1	4.76	1.56-14.5	0.006
ENSG00000104885.16	4.5	1.13-18.01	0.033
ENSG00000104897.8	1.95	1.19-3.21	0.008
ENSG00000104921.13	6.02	1.99-18.23	0.001
ENSG00000104967.6	4.19	1.21-14.48	0.024
ENSG00000105058.10	0.23	0.06-0.79	0.02
ENSG00000105063.17	2.46	1.02-5.91	0.044
ENSG00000105135.14	3.42	1.21-9.69	0.02
ENSG00000105137.11	6.7	2.05-21.92	0.002
ENSG00000105176.16	0.24	0.1-0.56	0.001
ENSG00000105245.8	3.85	1.31-11.3	0.014
ENSG00000105289.13	0.64	0.44-0.92	0.017
ENSG00000105290.10	1.65	1.03-2.63	0.037
ENSG00000105329.8	2.9	1.18-7.15	0.021
ENSG00000105355.7	2.86	1.41-5.79	0.004
ENSG00000105370.6	4.98	1.15-21.53	0.032
ENSG00000105373.17	3.04	1.08-8.54	0.035
ENSG00000105398.3	22.86	4.82-108.34	0
ENSG00000105419.16	3.46	1.61-7.41	0.001
ENSG00000105472.11	2.47	1.49-4.08	0
ENSG00000105556.9	4.67	1.16-18.79	0.03
ENSG00000105576.14	3.99	1.22-13.08	0.022
ENSG00000105669.11	3.29	1.13-9.58	0.029
ENSG00000105722.8	2.9	1.2-7.02	0.018
ENSG00000105819.12	0.22	0.06-0.9	0.035
ENSG00000105889.13	1.66	1.04-2.65	0.035
ENSG00000105948.12	0.23	0.07-0.79	0.02
ENSG00000106038.11	3.3	1.04-10.47	0.043
ENSG00000106070.16	1.76	1.1-2.81	0.018
ENSG00000106290.13	2.06	1.03-4.12	0.04
ENSG00000106331.13	19.67	3.25-118.84	0.001
ENSG00000106333.11	1.48	1.02-2.16	0.039
ENSG00000106348.15	2.04	1-4.15	0.049
ENSG00000106397.10	2.02	1.07-3.82	0.03
ENSG00000106443.13	0.57	0.33-0.96	0.036
ENSG00000106571.11	2.03	1.13-3.63	0.017
ENSG00000106617.12	0.16	0.04-0.61	0.008
ENSG00000106665.14	2.02	1.2-3.4	0.008
ENSG00000106692.12	0.51	0.29-0.9	0.02
ENSG00000106733.19	0.33	0.15-0.75	0.008
ENSG00000106780.8	0.61	0.38-0.97	0.037
ENSG00000106789.11	0.39	0.23-0.68	0.001
ENSG00000106976.17	1.62	1.07-2.46	0.023
ENSG00000106993.10	0.46	0.24-0.91	0.025
ENSG00000107104.17	0.25	0.08-0.78	0.017
ENSG00000107130.8	2.44	1.01-5.89	0.047
ENSG00000107164.15	3.29	1.3-8.34	0.012
ENSG00000107242.16	0.42	0.23-0.76	0.004
ENSG00000107262.15	0.5	0.27-0.91	0.023
ENSG00000107331.15	7.53	1.76-32.17	0.006
ENSG00000107447.6	27.44	1.78-423.67	0.018
ENSG00000107560.9	0.64	0.43-0.95	0.026
ENSG00000107581.11	0.56	0.35-0.9	0.018
ENSG00000107672.13	0.32	0.13-0.78	0.012
ENSG00000107731.11	2.2	1.31-3.7	0.003
ENSG00000107796.11	3.02	1.08-8.44	0.035
ENSG00000107819.12	2.08	1.01-4.32	0.048
ENSG00000107897.17	0.63	0.4-0.99	0.043
ENSG00000107949.15	0.43	0.2-0.94	0.034
ENSG00000107957.15	4.95	2.17-11.25	0
ENSG00000107960.9	0.37	0.18-0.78	0.009
ENSG00000107984.8	1.23	1.05-1.43	0.009
ENSG00000108001.12	11.16	3.68-33.85	0
ENSG00000108064.9	0.39	0.18-0.88	0.023
ENSG00000108094.13	0.42	0.23-0.77	0.005
ENSG00000108175.15	4.52	1.21-16.98	0.025
ENSG00000108187.14	0.54	0.3-0.98	0.043
ENSG00000108298.8	0.1	0.02-0.41	0.002
ENSG00000108384.13	0.38	0.15-0.99	0.049
ENSG00000108406.8	0.59	0.42-0.83	0.003
ENSG00000108417.3	5.76	1.24-26.79	0.026
ENSG00000108423.13	0.26	0.11-0.62	0.002
ENSG00000108443.12	0.57	0.35-0.93	0.025
ENSG00000108506.10	0.6	0.38-0.95	0.028
ENSG00000108556.7	11.27	2.83-44.88	0.001
ENSG00000108559.10	0.37	0.16-0.87	0.023
ENSG00000108588.12	0.55	0.36-0.83	0.005
ENSG00000108651.8	0.21	0.05-0.89	0.034
ENSG00000108654.10	0.4	0.23-0.71	0.002
ENSG00000108666.8	0.52	0.3-0.9	0.019
ENSG00000108702.3	3.42	1.32-8.85	0.011
ENSG00000108733.8	0.48	0.28-0.82	0.008
ENSG00000108797.10	2.26	1.08-4.71	0.03
ENSG00000108821.12	2.69	1.49-4.86	0.001
ENSG00000108828.14	2.32	1.26-4.26	0.007
ENSG00000108852.13	3.92	1.5-10.27	0.005
ENSG00000108924.12	0.76	0.6-0.98	0.032
ENSG00000108960.6	1.65	1.02-2.66	0.042
ENSG00000108961.12	0.35	0.16-0.76	0.008
ENSG00000109016.16	0.56	0.32-0.98	0.042
ENSG00000109047.7	3.63	1.02-12.89	0.046
ENSG00000109083.12	0.28	0.11-0.68	0.005
ENSG00000109099.12	2.57	1.3-5.07	0.006
ENSG00000109133.11	0.48	0.25-0.93	0.03
ENSG00000109265.11	1.95	1.04-3.63	0.036
ENSG00000109270.11	0.56	0.36-0.86	0.009
ENSG00000109320.10	0.51	0.27-0.98	0.043
ENSG00000109436.7	0.37	0.18-0.77	0.008
ENSG00000109458.7	0.26	0.07-0.99	0.048
ENSG00000109472.12	1.4	1.07-1.82	0.013
ENSG00000109475.15	0.33	0.12-0.87	0.026
ENSG00000109606.11	0.5	0.32-0.79	0.003
ENSG00000109618.10	0.17	0.04-0.76	0.021
ENSG00000109667.10	3.06	1.07-8.78	0.038
ENSG00000109705.7	1.52	1.17-1.98	0.002
ENSG00000110013.11	0.27	0.08-0.85	0.026
ENSG00000110060.7	0.37	0.16-0.84	0.018
ENSG00000110148.8	3.54	1.01-12.38	0.048
ENSG00000110195.10	0.86	0.76-0.98	0.019
ENSG00000110243.10	5.38	1.07-27.07	0.041
ENSG00000110315.5	0.24	0.07-0.75	0.014
ENSG00000110367.10	0.19	0.07-0.55	0.002
ENSG00000110375.2	4.4	1.83-10.61	0.001
ENSG00000110395.4	4.41	1.41-13.8	0.011
ENSG00000110422.10	0.2	0.05-0.81	0.024
ENSG00000110427.13	1.89	1-3.55	0.049
ENSG00000110435.10	0.53	0.34-0.83	0.005
ENSG00000110536.12	0.34	0.14-0.8	0.013
ENSG00000110696.8	0.28	0.11-0.72	0.008
ENSG00000110768.10	0.37	0.16-0.85	0.019
ENSG00000110841.12	2.4	1.24-4.67	0.01
ENSG00000110848.7	0.74	0.55-0.99	0.044
ENSG00000110880.9	2.03	1.1-3.75	0.024
ENSG00000110881.10	3	1.12-7.99	0.028
ENSG00000110911.13	0.45	0.21-0.96	0.04
ENSG00000111087.8	2.21	1.06-4.59	0.034
ENSG00000111142.12	0.5	0.31-0.8	0.004
ENSG00000111203.10	2.92	1.12-7.59	0.028
ENSG00000111206.11	1.34	1.06-1.69	0.014
ENSG00000111269.2	0.55	0.32-0.97	0.037
ENSG00000111275.11	0.47	0.31-0.71	0
ENSG00000111361.11	0.35	0.16-0.77	0.009
ENSG00000111452.11	0.75	0.59-0.96	0.022
ENSG00000111640.13	2.28	1.07-4.88	0.033
ENSG00000111665.10	1.33	1.02-1.73	0.036
ENSG00000111670.13	0.22	0.08-0.6	0.003
ENSG00000111671.8	0.6	0.39-0.91	0.017
ENSG00000111725.9	0.49	0.3-0.81	0.006
ENSG00000111731.11	0.68	0.47-0.97	0.034
ENSG00000111785.17	0.12	0.03-0.45	0.002
ENSG00000111799.19	1.33	1.03-1.72	0.031
ENSG00000111846.14	0.43	0.22-0.86	0.017
ENSG00000111875.7	0.66	0.45-0.98	0.038
ENSG00000111879.17	0.3	0.12-0.74	0.009
ENSG00000111907.19	0.69	0.5-0.93	0.017
ENSG00000111911.6	0.28	0.11-0.68	0.005
ENSG00000111912.17	0.38	0.17-0.85	0.018
ENSG00000112077.14	10.45	1.36-80.06	0.024
ENSG00000112081.15	0.33	0.13-0.88	0.026
ENSG00000112139.13	5.87	1.48-23.22	0.012
ENSG00000112144.14	0.27	0.08-0.92	0.037
ENSG00000112146.15	0.29	0.12-0.72	0.008
ENSG00000112167.8	0.23	0.06-0.83	0.024
ENSG00000112242.13	2.91	1.3-6.5	0.009
ENSG00000112246.8	9.7	1.3-72.26	0.027
ENSG00000112294.11	0.52	0.31-0.87	0.012
ENSG00000112306.7	0.32	0.14-0.75	0.009
ENSG00000112379.8	0.49	0.3-0.8	0.005
ENSG00000112541.12	1.99	1.1-3.61	0.023
ENSG00000112592.11	0.39	0.16-0.94	0.035
ENSG00000112619.7	3.38	1.64-6.96	0.001
ENSG00000112701.16	0.48	0.28-0.85	0.011
ENSG00000112769.17	2.61	1.13-6.04	0.025
ENSG00000112796.8	0.7	0.5-0.96	0.028
ENSG00000112977.14	0.55	0.3-0.99	0.048
ENSG00000113083.11	1.59	1.08-2.34	0.018
ENSG00000113141.14	0.46	0.22-0.97	0.041
ENSG00000113209.8	1.24	1.01-1.52	0.043
ENSG00000113282.12	0.36	0.16-0.8	0.012
ENSG00000113578.16	2.05	1.04-4.03	0.037
ENSG00000113594.8	0.55	0.32-0.92	0.024
ENSG00000113648.15	10.99	3.35-36.02	0
ENSG00000113657.11	1.52	1.03-2.25	0.036
ENSG00000113721.12	1.91	1.09-3.34	0.024
ENSG00000113758.12	2.23	1.32-3.76	0.003
ENSG00000113763.9	2.5	1.2-5.22	0.014
ENSG00000113851.12	0.65	0.43-0.97	0.037
ENSG00000114021.10	0.52	0.27-0.99	0.045
ENSG00000114107.7	0.41	0.19-0.89	0.024
ENSG00000114200.8	0.62	0.4-0.98	0.04
ENSG00000114268.10	2.73	1.34-5.55	0.005
ENSG00000114270.14	1.78	1.25-2.55	0.001
ENSG00000114279.12	3.42	1.42-8.26	0.006
ENSG00000114446.4	0.61	0.39-0.96	0.031
ENSG00000114473.12	0.26	0.1-0.67	0.006
ENSG00000114520.9	0.58	0.35-0.97	0.038
ENSG00000114554.10	3	1.1-8.16	0.031
ENSG00000114737.14	0.64	0.42-0.98	0.042
ENSG00000114812.11	0.58	0.34-0.99	0.045
ENSG00000114902.12	0.45	0.24-0.87	0.018
ENSG00000115053.14	0.18	0.04-0.9	0.036
ENSG00000115109.12	0.59	0.37-0.94	0.027
ENSG00000115112.7	0.64	0.47-0.87	0.005
ENSG00000115137.10	0.23	0.07-0.72	0.011
ENSG00000115145.8	0.44	0.21-0.93	0.031
ENSG00000115268.8	5.65	1.08-29.56	0.04
ENSG00000115318.10	2.51	1.31-4.81	0.006
ENSG00000115363.12	0.73	0.54-0.97	0.031
ENSG00000115414.17	2.07	1.21-3.57	0.008
ENSG00000115446.10	0.4	0.23-0.69	0.001
ENSG00000115461.4	1.53	1.13-2.07	0.006
ENSG00000115488.3	3.58	1.06-12.05	0.04
ENSG00000115525.15	0.75	0.56-1	0.047
ENSG00000115592.10	5.13	1.18-22.33	0.029
ENSG00000115596.3	10.68	2.09-54.7	0.004
ENSG00000115604.9	0.38	0.17-0.84	0.017
ENSG00000115652.13	0.49	0.3-0.82	0.006
ENSG00000115661.12	0.23	0.07-0.79	0.019
ENSG00000115685.13	0.36	0.14-0.93	0.035
ENSG00000115750.15	0.49	0.25-0.96	0.039
ENSG00000115761.14	0.23	0.07-0.8	0.021
ENSG00000115827.12	0.37	0.15-0.91	0.031
ENSG00000115840.12	0.47	0.23-0.97	0.041
ENSG00000115841.18	0.14	0.04-0.54	0.004
ENSG00000115875.17	0.28	0.09-0.89	0.031
ENSG00000115904.11	0.44	0.2-0.97	0.043
ENSG00000115947.12	0.44	0.21-0.96	0.039
ENSG00000115977.17	35.38	5.04-248.37	0
ENSG00000115998.6	0.19	0.05-0.65	0.008
ENSG00000116005.10	0.65	0.43-0.99	0.047
ENSG00000116014.8	1.25	1.04-1.49	0.015
ENSG00000116095.9	0.17	0.05-0.61	0.006
ENSG00000116133.10	0.68	0.47-0.98	0.039
ENSG00000116138.11	0.16	0.05-0.46	0.001
ENSG00000116171.15	0.64	0.44-0.92	0.015
ENSG00000116251.8	0.27	0.1-0.7	0.007
ENSG00000116254.16	4.26	1.13-16.05	0.032
ENSG00000116288.11	0.12	0.03-0.44	0.001
ENSG00000116337.14	2.8	1.16-6.73	0.022
ENSG00000116396.12	3.2	1.29-7.92	0.012
ENSG00000116459.9	0.3	0.13-0.7	0.005
ENSG00000116473.13	0.13	0.03-0.67	0.014
ENSG00000116539.9	0.52	0.27-0.97	0.039
ENSG00000116641.14	0.46	0.23-0.9	0.023
ENSG00000116667.11	0.41	0.2-0.87	0.02
ENSG00000116668.11	0.24	0.08-0.67	0.007
ENSG00000116726.4	5.14	1.43-18.4	0.012
ENSG00000116748.18	0.71	0.52-0.98	0.036
ENSG00000116783.13	0.09	0.01-0.65	0.017
ENSG00000116791.12	0.7	0.54-0.92	0.011
ENSG00000116819.6	1.93	1.05-3.54	0.034
ENSG00000116885.17	0.53	0.33-0.88	0.013
ENSG00000116906.10	0.58	0.34-0.99	0.048
ENSG00000116918.12	0.68	0.47-0.99	0.042
ENSG00000116984.11	0.65	0.44-0.96	0.032
ENSG00000116996.8	4.43	1.13-17.27	0.032
ENSG00000117054.12	0.53	0.38-0.75	0
ENSG00000117115.11	3.1	1.25-7.69	0.014
ENSG00000117118.8	0.26	0.09-0.74	0.012
ENSG00000117122.12	1.57	1.05-2.33	0.026
ENSG00000117152.12	1.86	1.16-2.96	0.009
ENSG00000117281.14	0.27	0.09-0.87	0.028
ENSG00000117394.18	1.36	1.06-1.74	0.014
ENSG00000117399.12	1.28	1.02-1.6	0.036
ENSG00000117411.15	2.88	1.39-5.97	0.004
ENSG00000117450.12	0.55	0.31-0.99	0.048
ENSG00000117500.11	0.31	0.14-0.71	0.006
ENSG00000117528.10	0.49	0.26-0.92	0.027
ENSG00000117543.18	0.31	0.1-0.94	0.039
ENSG00000117602.10	0.42	0.2-0.9	0.026
ENSG00000117614.8	0.19	0.05-0.74	0.017
ENSG00000117640.16	0.45	0.21-0.99	0.048
ENSG00000117676.12	0.42	0.21-0.85	0.016
ENSG00000117751.16	0.51	0.29-0.9	0.021
ENSG00000117758.12	0.48	0.25-0.92	0.026
ENSG00000117862.10	0.5	0.25-1	0.049
ENSG00000118242.14	0.33	0.18-0.61	0
ENSG00000118418.13	0.55	0.36-0.85	0.007
ENSG00000118454.11	0.49	0.25-0.95	0.035
ENSG00000118518.14	0.5	0.29-0.87	0.014
ENSG00000118640.9	0.37	0.19-0.71	0.003
ENSG00000118733.15	11.26	1.1-115.06	0.041
ENSG00000119321.7	7.16	1.19-42.94	0.031
ENSG00000119328.10	0.48	0.27-0.84	0.011
ENSG00000119396.9	0.39	0.17-0.94	0.036
ENSG00000119402.15	0.24	0.06-0.91	0.036
ENSG00000119403.12	2.55	1.43-4.52	0.001
ENSG00000119408.15	3.33	1.15-9.68	0.027
ENSG00000119414.10	0.42	0.18-0.95	0.036
ENSG00000119471.13	0.57	0.34-0.93	0.025
ENSG00000119630.12	4.28	2.18-8.41	0
ENSG00000119655.7	0.52	0.32-0.87	0.012
ENSG00000119685.18	3.94	1.26-12.31	0.018
ENSG00000119699.6	3.87	1.55-9.66	0.004
ENSG00000119711.11	0.45	0.23-0.87	0.018
ENSG00000119714.9	2.34	1.13-4.84	0.022
ENSG00000119715.13	4.26	1.09-16.68	0.037
ENSG00000119778.13	0.32	0.12-0.88	0.028
ENSG00000119787.12	0.42	0.19-0.92	0.03
ENSG00000119801.11	0.41	0.24-0.7	0.001
ENSG00000119844.13	0.42	0.23-0.75	0.004
ENSG00000119912.14	0.47	0.26-0.85	0.012
ENSG00000119929.11	0.41	0.22-0.77	0.006
ENSG00000119973.4	3.04	1.4-6.59	0.005
ENSG00000120071.11	1.94	1.01-3.74	0.048
ENSG00000120149.8	1.77	1.02-3.04	0.041
ENSG00000120159.10	0.57	0.34-0.96	0.034
ENSG00000120254.14	6.21	1.53-25.23	0.011
ENSG00000120280.5	2.32	1.17-4.62	0.017
ENSG00000120322.3	1.84	1.05-3.23	0.034
ENSG00000120327.6	1.48	1.03-2.12	0.034
ENSG00000120328.6	4.55	1.26-16.46	0.021
ENSG00000120333.4	0.23	0.09-0.58	0.002
ENSG00000120370.11	0.7	0.51-0.96	0.028
ENSG00000120500.16	5.63	1.37-23.15	0.017
ENSG00000120533.11	0.42	0.21-0.85	0.016
ENSG00000120549.14	3.05	1.25-7.46	0.014
ENSG00000120616.14	0.29	0.13-0.66	0.003
ENSG00000120645.10	5.89	1.03-33.65	0.046
ENSG00000120656.10	0.49	0.31-0.76	0.002
ENSG00000120659.13	1.76	1.19-2.61	0.005
ENSG00000120662.14	0.06	0.01-0.36	0.002
ENSG00000120685.18	0.46	0.23-0.9	0.024
ENSG00000120686.10	0.6	0.36-0.99	0.045
ENSG00000120688.8	0.44	0.21-0.92	0.029
ENSG00000120696.8	0.56	0.33-0.95	0.032
ENSG00000120697.7	0.12	0.03-0.56	0.007
ENSG00000120699.11	0.46	0.23-0.91	0.026
ENSG00000120708.15	1.64	1.11-2.42	0.013
ENSG00000120709.9	2.34	1.1-4.98	0.028
ENSG00000120742.9	0.58	0.39-0.84	0.004
ENSG00000120756.11	0.65	0.49-0.87	0.003
ENSG00000120798.15	0.33	0.12-0.92	0.035
ENSG00000120832.8	0.34	0.14-0.82	0.017
ENSG00000120860.9	0.42	0.26-0.69	0.001
ENSG00000120885.18	0.7	0.49-1	0.048
ENSG00000120896.12	2.99	1.12-7.95	0.028
ENSG00000120915.12	0.56	0.35-0.91	0.018
ENSG00000120925.12	0.39	0.16-0.97	0.043
ENSG00000120948.14	0.38	0.18-0.8	0.011
ENSG00000120949.13	5.09	1.72-15.06	0.003
ENSG00000120963.10	0.4	0.2-0.79	0.008
ENSG00000121022.12	0.64	0.42-0.95	0.027
ENSG00000121039.8	0.53	0.33-0.85	0.008
ENSG00000121053.5	3.84	1.44-10.23	0.007
ENSG00000121057.11	0.37	0.19-0.71	0.003
ENSG00000121104.6	0.45	0.26-0.78	0.004
ENSG00000121297.6	1.74	1.14-2.67	0.011
ENSG00000121310.15	0.54	0.3-0.98	0.044
ENSG00000121314.2	11.62	3.06-44.18	0
ENSG00000121390.16	0.22	0.06-0.83	0.025
ENSG00000121446.16	8.4	1.75-40.36	0.008
ENSG00000121486.10	0.43	0.24-0.75	0.003
ENSG00000121570.11	23.91	2.59-220.28	0.005
ENSG00000121691.4	0.27	0.14-0.5	0
ENSG00000121851.11	0.49	0.29-0.83	0.007
ENSG00000121897.12	0.47	0.29-0.77	0.002
ENSG00000121904.16	5.28	1.66-16.82	0.005
ENSG00000121940.14	0.49	0.25-0.97	0.039
ENSG00000122012.12	7.17	1.17-44.01	0.033
ENSG00000122042.9	0.57	0.38-0.83	0.004
ENSG00000122121.9	3.72	1.43-9.65	0.007
ENSG00000122218.13	5.77	1.64-20.26	0.006
ENSG00000122257.17	0.11	0.03-0.35	0
ENSG00000122299.10	0.46	0.28-0.76	0.002
ENSG00000122547.9	6.13	1.52-24.74	0.011
ENSG00000122585.6	1.45	1.03-2.06	0.035
ENSG00000122674.10	6.48	1.28-32.86	0.024
ENSG00000122691.11	1.31	1.07-1.61	0.01
ENSG00000122779.15	0.45	0.26-0.78	0.004
ENSG00000122824.9	5.73	1.14-28.96	0.035
ENSG00000122861.14	1.32	1.01-1.73	0.041
ENSG00000122970.14	0.24	0.07-0.8	0.02
ENSG00000123080.9	1.82	1.07-3.09	0.026
ENSG00000123178.13	0.23	0.06-0.81	0.022
ENSG00000123179.12	0.46	0.28-0.76	0.003
ENSG00000123268.7	0.52	0.32-0.85	0.008
ENSG00000123352.16	1.96	1.02-3.79	0.045
ENSG00000123384.12	6.39	1.75-23.36	0.005
ENSG00000123472.11	0.25	0.11-0.59	0.001
ENSG00000123485.10	1.45	1.05-2	0.024
ENSG00000123545.5	0.28	0.12-0.68	0.005
ENSG00000123609.9	0.62	0.39-0.99	0.047
ENSG00000123636.16	0.66	0.45-0.97	0.036
ENSG00000123643.11	5.56	1.68-18.43	0.005
ENSG00000123739.9	0.4	0.22-0.74	0.003
ENSG00000123836.13	0.41	0.17-1	0.049
ENSG00000123838.9	0.83	0.73-0.95	0.006
ENSG00000123908.10	1.76	1.04-3	0.036
ENSG00000123989.12	2.98	1.57-5.68	0.001
ENSG00000124067.15	5.23	1.16-23.61	0.031
ENSG00000124091.8	15.91	2.75-91.85	0.002
ENSG00000124155.15	3.41	1.23-9.48	0.019
ENSG00000124193.13	0.42	0.24-0.72	0.002
ENSG00000124209.3	0.5	0.29-0.86	0.012
ENSG00000124212.5	1.9	1.04-3.46	0.036
ENSG00000124216.3	2.02	1.06-3.85	0.032
ENSG00000124225.14	1.67	1.07-2.6	0.024
ENSG00000124275.13	0.47	0.29-0.75	0.002
ENSG00000124279.10	0.47	0.3-0.72	0.001
ENSG00000124333.13	0.63	0.44-0.9	0.01
ENSG00000124370.9	0.33	0.17-0.67	0.002
ENSG00000124374.8	0.37	0.23-0.61	0
ENSG00000124383.7	0.49	0.31-0.78	0.003
ENSG00000124406.15	0.42	0.23-0.76	0.004
ENSG00000124422.10	19.18	1.9-193.67	0.012
ENSG00000124486.11	0.54	0.3-0.94	0.031
ENSG00000124587.12	0.61	0.38-0.98	0.041
ENSG00000124596.15	0.3	0.15-0.59	0.001
ENSG00000124641.13	0.36	0.14-0.91	0.03
ENSG00000124767.6	0.56	0.33-0.94	0.028
ENSG00000124782.18	13.37	3.25-55.04	0
ENSG00000124786.9	0.52	0.27-0.99	0.048
ENSG00000124813.19	2.63	1.03-6.67	0.042
ENSG00000124818.13	14.42	2.14-96.93	0.006
ENSG00000124839.11	0.69	0.48-0.99	0.042
ENSG00000125084.10	6.67	1.2-36.96	0.03
ENSG00000125144.12	3.38	1.59-7.19	0.002
ENSG00000125148.6	1.76	1.09-2.82	0.02
ENSG00000125149.10	5.49	1.3-23.09	0.02
ENSG00000125170.9	0.6	0.38-0.97	0.038
ENSG00000125207.6	3.43	1.04-11.29	0.043
ENSG00000125285.5	4.73	1.94-11.56	0.001
ENSG00000125304.8	0.63	0.43-0.93	0.019
ENSG00000125356.6	0.37	0.14-0.95	0.038
ENSG00000125485.16	0.28	0.08-0.96	0.043
ENSG00000125498.18	1.86	1.16-2.99	0.01
ENSG00000125629.13	0.63	0.42-0.95	0.027
ENSG00000125676.18	0.61	0.4-0.93	0.022
ENSG00000125703.13	0.47	0.25-0.86	0.015
ENSG00000125753.12	1.97	1.02-3.79	0.042
ENSG00000125772.11	0.54	0.33-0.87	0.011
ENSG00000125787.10	2.3	1.04-5.09	0.039
ENSG00000125798.13	0.76	0.58-1	0.047
ENSG00000125818.16	0.28	0.09-0.85	0.025
ENSG00000125827.7	0.42	0.22-0.8	0.008
ENSG00000125863.16	0.25	0.13-0.47	0
ENSG00000125868.14	0.41	0.21-0.79	0.008
ENSG00000125871.12	0.49	0.26-0.94	0.032
ENSG00000125877.11	0.35	0.13-0.94	0.037
ENSG00000125962.13	0.49	0.24-0.99	0.048
ENSG00000125970.10	0.4	0.17-0.94	0.035
ENSG00000125977.6	0.21	0.08-0.53	0.001
ENSG00000126070.17	0.48	0.24-0.94	0.031
ENSG00000126226.20	0.29	0.16-0.52	0
ENSG00000126243.7	2	1.06-3.78	0.033
ENSG00000126391.12	4.78	1.31-17.4	0.018
ENSG00000126467.9	4.32	1.03-18.03	0.045
ENSG00000126550.7	14.67	1.78-121.08	0.013
ENSG00000126653.14	0.53	0.31-0.9	0.019
ENSG00000126705.12	5.06	1.46-17.46	0.01
ENSG00000126733.19	2.54	1.28-5.03	0.008
ENSG00000126803.9	1.41	1.07-1.85	0.014
ENSG00000126822.14	2.26	1.09-4.69	0.029
ENSG00000126858.15	0.52	0.3-0.9	0.02
ENSG00000127125.8	0.41	0.19-0.87	0.021
ENSG00000127184.9	0.35	0.14-0.89	0.028
ENSG00000127325.17	9.76	1.51-62.98	0.017
ENSG00000127366.5	4.76	1.32-17.15	0.017
ENSG00000127481.13	15.42	1.66-143.52	0.016
ENSG00000127515.1	10.63	2.53-44.74	0.001
ENSG00000127564.15	1.96	1.02-3.79	0.045
ENSG00000127666.9	2.75	1.19-6.33	0.018
ENSG00000127720.6	0.28	0.13-0.63	0.002
ENSG00000127824.12	1.96	1.16-3.31	0.012
ENSG00000127837.8	0.35	0.12-0.99	0.049
ENSG00000127995.15	0.31	0.1-0.99	0.049
ENSG00000128203.6	1.7	1.1-2.65	0.017
ENSG00000128250.5	20.6	1.6-264.47	0.02
ENSG00000128285.4	2.72	1.41-5.27	0.003
ENSG00000128309.15	0.45	0.22-0.94	0.035
ENSG00000128310.2	5.07	1.75-14.7	0.003
ENSG00000128311.12	0.49	0.32-0.77	0.002
ENSG00000128322.6	3.44	1.17-10.09	0.024
ENSG00000128335.12	2.57	1.04-6.37	0.042
ENSG00000128463.11	0.51	0.28-0.91	0.022
ENSG00000128510.9	2.98	1.09-8.15	0.033
ENSG00000128519.3	10.56	2.84-39.31	0
ENSG00000128534.6	0.29	0.1-0.85	0.024
ENSG00000128564.6	1.36	1.03-1.78	0.029
ENSG00000128585.16	0.41	0.18-0.93	0.032
ENSG00000128591.14	1.69	1.05-2.7	0.03
ENSG00000128602.8	2.53	1.13-5.69	0.024
ENSG00000128654.12	0.47	0.3-0.74	0.001
ENSG00000128655.15	21.07	1.81-245.7	0.015
ENSG00000128694.10	0.4	0.17-0.95	0.039
ENSG00000128805.13	3.53	1.37-9.09	0.009
ENSG00000128833.11	0.56	0.41-0.77	0
ENSG00000128908.14	0.16	0.05-0.5	0.002
ENSG00000128915.10	0.34	0.15-0.75	0.008
ENSG00000129007.13	0.31	0.11-0.87	0.025
ENSG00000129009.11	1.51	1.08-2.12	0.017
ENSG00000129055.11	0.24	0.07-0.75	0.014
ENSG00000129084.16	0.53	0.28-0.98	0.045
ENSG00000129195.14	1.57	1.09-2.25	0.016
ENSG00000129197.13	0.2	0.04-0.97	0.045
ENSG00000129235.9	0.5	0.26-0.93	0.028
ENSG00000129422.12	0.61	0.42-0.9	0.014
ENSG00000129521.12	1.5	1.17-1.93	0.002
ENSG00000129538.12	0.6	0.36-1	0.048
ENSG00000129625.11	0.43	0.24-0.8	0.007
ENSG00000129654.7	0.65	0.44-0.96	0.032
ENSG00000129810.13	4.38	1.3-14.74	0.017
ENSG00000129911.7	3.1	1.02-9.44	0.047
ENSG00000129951.17	2.85	1.27-6.39	0.011
ENSG00000130005.10	2.31	1.12-4.76	0.023
ENSG00000130021.12	0.58	0.33-1	0.048
ENSG00000130023.14	0.11	0.04-0.3	0
ENSG00000130024.13	0.44	0.23-0.83	0.012
ENSG00000130066.15	0.46	0.23-0.95	0.035
ENSG00000130147.14	1.83	1.01-3.31	0.047
ENSG00000130175.8	2.74	1.1-6.82	0.031
ENSG00000130177.13	0.31	0.16-0.62	0.001
ENSG00000130201.6	2.57	1.02-6.51	0.046
ENSG00000130222.9	0.56	0.34-0.9	0.016
ENSG00000130309.9	2.88	1.42-5.84	0.003
ENSG00000130349.8	0.42	0.2-0.88	0.022
ENSG00000130385.5	5.89	1.27-27.31	0.023
ENSG00000130433.6	3.95	1.04-15.05	0.044
ENSG00000130477.13	2.16	1.12-4.17	0.022
ENSG00000130508.9	1.69	1.16-2.46	0.007
ENSG00000130559.17	11.39	2.67-48.61	0.001
ENSG00000130635.14	1.7	1.22-2.38	0.002
ENSG00000130638.14	0.41	0.19-0.85	0.017
ENSG00000130684.12	0.24	0.07-0.74	0.014
ENSG00000130703.14	0.35	0.14-0.89	0.027
ENSG00000130720.11	2.68	1.54-4.65	0
ENSG00000130770.16	0.38	0.16-0.9	0.028
ENSG00000130827.6	4.72	1.2-18.54	0.026
ENSG00000130988.11	0.67	0.47-0.96	0.027
ENSG00000131015.4	1.41	1-1.98	0.047
ENSG00000131069.18	0.53	0.31-0.89	0.018
ENSG00000131153.7	2.92	1.46-5.84	0.002
ENSG00000131165.13	2.43	1.12-5.29	0.025
ENSG00000131174.4	0.41	0.23-0.75	0.003
ENSG00000131183.9	5.79	1.12-29.98	0.036
ENSG00000131368.6	0.49	0.27-0.89	0.018
ENSG00000131373.13	0.48	0.24-0.97	0.04
ENSG00000131374.13	0.23	0.06-0.84	0.027
ENSG00000131389.15	2.31	1.15-4.65	0.019
ENSG00000131435.11	1.99	1.21-3.28	0.007
ENSG00000131746.11	1.97	1.22-3.18	0.005
ENSG00000131779.9	0.48	0.29-0.8	0.005
ENSG00000131828.12	0.34	0.13-0.91	0.031
ENSG00000131871.13	0.55	0.32-0.97	0.037
ENSG00000131873.5	2.1	1.22-3.64	0.008
ENSG00000131931.7	0.63	0.41-0.97	0.036
ENSG00000132000.10	2.7	1.37-5.33	0.004
ENSG00000132003.8	6.31	1.35-29.48	0.019
ENSG00000132005.7	4.76	1.24-18.34	0.023
ENSG00000132141.12	0.35	0.14-0.9	0.03
ENSG00000132205.9	3.31	1.27-8.58	0.014
ENSG00000132323.7	0.31	0.11-0.89	0.03
ENSG00000132405.17	0.27	0.11-0.66	0.004
ENSG00000132406.10	0.49	0.31-0.76	0.001
ENSG00000132446.6	3.87	1.23-12.24	0.021
ENSG00000132465.9	0.79	0.65-0.95	0.013
ENSG00000132485.11	0.61	0.39-0.95	0.029
ENSG00000132517.13	0.29	0.12-0.71	0.006
ENSG00000132535.17	3.29	1.35-7.99	0.009
ENSG00000132541.9	0.35	0.14-0.87	0.024
ENSG00000132563.14	3.92	1.36-11.29	0.012
ENSG00000132623.14	0.18	0.06-0.54	0.002
ENSG00000132664.10	0.36	0.18-0.69	0.002
ENSG00000132671.5	4.93	2.36-10.31	0
ENSG00000132676.14	8.69	1.53-49.26	0.015
ENSG00000132693.11	7.78	1.24-48.91	0.029
ENSG00000132744.6	3.56	1.23-10.31	0.019
ENSG00000132842.12	0.43	0.18-0.99	0.047
ENSG00000132953.15	0.27	0.1-0.76	0.013
ENSG00000133019.10	3.42	1.56-7.49	0.002
ENSG00000133065.9	0.49	0.28-0.84	0.01
ENSG00000133103.15	0.43	0.21-0.86	0.018
ENSG00000133111.3	0.18	0.05-0.69	0.013
ENSG00000133114.16	0.44	0.24-0.81	0.009
ENSG00000133116.7	0.46	0.24-0.88	0.019
ENSG00000133466.12	2.65	1.48-4.76	0.001
ENSG00000133606.9	0.3	0.12-0.74	0.009
ENSG00000133636.9	1.22	1.05-1.41	0.008
ENSG00000133661.14	0.86	0.75-0.98	0.026
ENSG00000133710.14	0.79	0.65-0.96	0.016
ENSG00000133816.12	2.25	1.18-4.28	0.013
ENSG00000133818.11	0.5	0.3-0.83	0.008
ENSG00000133835.13	0.31	0.12-0.8	0.016
ENSG00000133863.5	12	1.71-84.04	0.012
ENSG00000133874.1	4.65	1.82-11.86	0.001
ENSG00000133961.18	2.03	1.1-3.72	0.023
ENSG00000134013.14	4.41	1.88-10.34	0.001
ENSG00000134056.10	0.49	0.29-0.82	0.007
ENSG00000134057.13	1.35	1.02-1.79	0.036
ENSG00000134109.9	0.55	0.31-0.97	0.039
ENSG00000134193.13	1.9	1.18-3.05	0.008
ENSG00000134216.17	0.65	0.49-0.87	0.003
ENSG00000134256.11	4.54	1.39-14.85	0.012
ENSG00000134352.18	0.54	0.3-0.98	0.042
ENSG00000134363.10	1.43	1.13-1.82	0.003
ENSG00000134369.14	2.62	1.45-4.73	0.001
ENSG00000134371.9	0.57	0.34-0.95	0.03
ENSG00000134375.9	0.31	0.11-0.88	0.028
ENSG00000134376.13	9.26	3.2-26.79	0
ENSG00000134419.14	0.24	0.08-0.77	0.017
ENSG00000134440.10	0.57	0.35-0.95	0.03
ENSG00000134444.12	0.44	0.21-0.89	0.022
ENSG00000134452.18	4.79	1.06-21.58	0.041
ENSG00000134548.8	3.79	1.94-7.42	0
ENSG00000134640.2	5.21	1.2-22.68	0.028
ENSG00000134709.9	0.63	0.42-0.95	0.026
ENSG00000134748.12	0.34	0.16-0.72	0.005
ENSG00000134780.8	3.69	1.05-12.97	0.042
ENSG00000134824.12	1.91	1-3.62	0.048
ENSG00000134830.5	2.66	1.21-5.84	0.015
ENSG00000134884.12	0.31	0.15-0.66	0.002
ENSG00000134897.12	0.31	0.11-0.85	0.023
ENSG00000134899.16	0.6	0.38-0.97	0.036
ENSG00000134900.10	0.34	0.15-0.76	0.009
ENSG00000134940.12	7	1.4-35.08	0.018
ENSG00000135074.14	4.09	1.68-9.94	0.002
ENSG00000135094.9	2.48	1.24-4.96	0.01
ENSG00000135185.10	0.51	0.34-0.77	0.001
ENSG00000135222.6	4.17	1.11-15.63	0.034
ENSG00000135253.12	3.37	1.36-8.39	0.009
ENSG00000135297.14	0.37	0.18-0.77	0.008
ENSG00000135299.15	0.54	0.32-0.89	0.017
ENSG00000135317.11	0.46	0.23-0.9	0.024
ENSG00000135336.13	0.6	0.36-0.99	0.045
ENSG00000135373.11	0.58	0.41-0.83	0.003
ENSG00000135378.3	0.62	0.39-0.97	0.035
ENSG00000135406.12	3.06	1.28-7.33	0.012
ENSG00000135436.7	4.56	1.52-13.73	0.007
ENSG00000135454.12	2.41	1.09-5.32	0.029
ENSG00000135457.8	0.29	0.11-0.72	0.008
ENSG00000135473.13	0.35	0.16-0.74	0.006
ENSG00000135541.19	0.26	0.08-0.9	0.033
ENSG00000135577.4	10.14	2.21-46.62	0.003
ENSG00000135631.14	2.51	1.1-5.72	0.029
ENSG00000135702.13	10.53	2.08-53.26	0.004
ENSG00000135776.4	0.66	0.48-0.91	0.011
ENSG00000135835.9	4.86	1.44-16.43	0.011
ENSG00000135930.12	0.26	0.08-0.87	0.029
ENSG00000135932.9	0.58	0.35-0.97	0.038
ENSG00000135945.8	0.39	0.19-0.8	0.01
ENSG00000135956.7	3.59	1.07-12.03	0.038
ENSG00000135968.18	0.26	0.1-0.68	0.006
ENSG00000135972.7	0.44	0.25-0.76	0.004
ENSG00000135999.10	0.59	0.37-0.95	0.031
ENSG00000136002.15	5.76	1.42-23.33	0.014
ENSG00000136003.14	0.25	0.12-0.53	0
ENSG00000136010.12	2.53	1.23-5.19	0.011
ENSG00000136021.16	0.5	0.26-0.95	0.033
ENSG00000136026.12	2.92	1.19-7.16	0.019
ENSG00000136048.12	0.56	0.39-0.82	0.003
ENSG00000136098.15	0.33	0.14-0.79	0.012
ENSG00000136100.11	0.33	0.15-0.73	0.006
ENSG00000136104.17	0.17	0.03-0.91	0.038
ENSG00000136110.11	1.2	1.02-1.42	0.03
ENSG00000136143.12	0.67	0.47-0.95	0.025
ENSG00000136144.10	0.24	0.06-0.9	0.034
ENSG00000136146.13	0.37	0.2-0.69	0.002
ENSG00000136147.15	0.46	0.22-0.98	0.044
ENSG00000136152.13	0.37	0.15-0.91	0.031
ENSG00000136156.11	0.38	0.18-0.83	0.015
ENSG00000136160.13	0.57	0.35-0.92	0.022
ENSG00000136295.13	2.5	1.33-4.73	0.005
ENSG00000136297.13	6.98	1.22-40.01	0.029
ENSG00000136352.16	0.82	0.67-1	0.046
ENSG00000136367.13	3.42	1.32-8.82	0.011
ENSG00000136378.13	4.36	1.24-15.38	0.022
ENSG00000136383.6	1.47	1.04-2.09	0.031
ENSG00000136425.11	3.4	1.45-8	0.005
ENSG00000136444.8	0.27	0.1-0.69	0.007
ENSG00000136450.11	0.32	0.11-0.95	0.04
ENSG00000136535.13	8.65	1.39-53.88	0.021
ENSG00000136546.12	0.62	0.42-0.93	0.022
ENSG00000136560.12	0.38	0.19-0.78	0.008
ENSG00000136696.9	7.59	1.17-49.42	0.034
ENSG00000136697.11	3.76	1.08-13.07	0.037
ENSG00000136710.8	0.41	0.2-0.85	0.016
ENSG00000136802.10	2.23	1.06-4.69	0.035
ENSG00000136840.17	0.5	0.26-0.96	0.038
ENSG00000136859.8	1.97	1.31-2.95	0.001
ENSG00000136870.9	0.47	0.27-0.82	0.008
ENSG00000136874.9	0.4	0.17-0.96	0.041
ENSG00000136877.13	2.92	1.04-8.2	0.042
ENSG00000136930.11	3.12	1.28-7.58	0.012
ENSG00000136931.8	4.05	1.48-11.08	0.006
ENSG00000136933.15	3.42	1.23-9.52	0.019
ENSG00000136935.12	0.28	0.09-0.9	0.032
ENSG00000136936.9	0.46	0.25-0.85	0.014
ENSG00000136943.9	1.52	1.05-2.18	0.025
ENSG00000137033.10	0.63	0.41-0.96	0.032
ENSG00000137075.16	0.35	0.14-0.9	0.03
ENSG00000137076.17	4.19	1.13-15.57	0.032
ENSG00000137080.4	10.88	1.79-66.11	0.01
ENSG00000137154.11	0.09	0.02-0.38	0.001
ENSG00000137267.5	1.4	1.01-1.93	0.042
ENSG00000137275.12	0.33	0.14-0.78	0.012
ENSG00000137404.13	2.24	1.31-3.81	0.003
ENSG00000137414.5	0.69	0.49-0.96	0.028
ENSG00000137492.6	0.6	0.39-0.92	0.018
ENSG00000137496.16	2.24	1.01-4.99	0.048
ENSG00000137507.10	2.37	1.36-4.12	0.002
ENSG00000137672.11	0.49	0.27-0.87	0.016
ENSG00000137675.4	4.16	1.25-13.8	0.02
ENSG00000137720.6	0.25	0.1-0.62	0.003
ENSG00000137776.15	0.49	0.31-0.78	0.003
ENSG00000137801.10	2.9	1.61-5.21	0
ENSG00000137806.7	0.47	0.26-0.85	0.013
ENSG00000137809.15	1.94	1.19-3.17	0.008
ENSG00000137841.10	3.76	1.13-12.56	0.031
ENSG00000137942.15	0.67	0.47-0.95	0.024
ENSG00000137947.10	0.53	0.33-0.83	0.006
ENSG00000137955.14	0.51	0.29-0.87	0.014
ENSG00000138002.13	0.46	0.25-0.83	0.011
ENSG00000138032.19	0.51	0.3-0.87	0.012
ENSG00000138036.17	0.43	0.21-0.89	0.022
ENSG00000138069.15	0.36	0.17-0.75	0.007
ENSG00000138078.14	0.37	0.18-0.75	0.006
ENSG00000138080.12	2.12	1.33-3.38	0.001
ENSG00000138162.16	0.44	0.22-0.86	0.016
ENSG00000138303.16	0.45	0.24-0.87	0.017
ENSG00000138311.14	2.61	1.08-6.29	0.033
ENSG00000138316.9	3.15	1.31-7.57	0.011
ENSG00000138326.17	0.49	0.3-0.79	0.004
ENSG00000138395.13	9.68	1.43-65.36	0.02
ENSG00000138413.12	0.49	0.27-0.88	0.017
ENSG00000138433.14	0.5	0.27-0.93	0.029
ENSG00000138472.9	18.49	2.2-155.56	0.007
ENSG00000138483.2	8.48	1.01-71.06	0.049
ENSG00000138592.12	0.57	0.35-0.93	0.026
ENSG00000138615.5	1.23	1.01-1.5	0.04
ENSG00000138617.13	0.27	0.11-0.68	0.005
ENSG00000138623.8	2.78	1.01-7.64	0.047
ENSG00000138663.7	0.38	0.16-0.9	0.029
ENSG00000138670.15	3.23	1.14-9.13	0.027
ENSG00000138675.15	7.96	1.3-48.64	0.025
ENSG00000138684.6	8.06	1.48-44.03	0.016
ENSG00000138757.13	0.54	0.3-0.99	0.047
ENSG00000138768.13	0.59	0.38-0.92	0.02
ENSG00000138769.9	0.6	0.41-0.87	0.007
ENSG00000138785.13	0.49	0.3-0.79	0.004
ENSG00000138795.8	2.35	1.06-5.22	0.035
ENSG00000138796.14	0.41	0.24-0.69	0.001
ENSG00000139168.6	0.45	0.24-0.87	0.017
ENSG00000139428.10	0.41	0.17-0.98	0.045
ENSG00000139433.8	0.47	0.25-0.89	0.02
ENSG00000139517.7	0.59	0.38-0.92	0.02
ENSG00000139610.1	6.39	2.35-17.39	0
ENSG00000139613.10	2.31	1.07-4.97	0.033
ENSG00000139620.11	0.47	0.24-0.93	0.03
ENSG00000139624.11	7.61	1.35-42.94	0.022
ENSG00000139641.11	2.23	1.12-4.43	0.022
ENSG00000139737.20	0.73	0.55-0.97	0.03
ENSG00000139746.14	0.25	0.08-0.8	0.019
ENSG00000139767.7	3.27	1.34-7.99	0.009
ENSG00000139793.17	0.17	0.04-0.72	0.015
ENSG00000139835.12	0.62	0.4-0.97	0.037
ENSG00000139880.18	3.02	1.41-6.48	0.005
ENSG00000139914.6	2.89	1-8.33	0.049
ENSG00000139971.14	2.9	1.58-5.35	0.001
ENSG00000139985.6	19.42	3.66-103.05	0
ENSG00000140254.11	0.62	0.4-0.96	0.03
ENSG00000140259.6	0.42	0.19-0.91	0.029
ENSG00000140280.12	0.59	0.35-0.99	0.048
ENSG00000140319.9	0.42	0.21-0.86	0.018
ENSG00000140323.5	2.07	1.39-3.1	0
ENSG00000140455.15	0.31	0.12-0.78	0.013
ENSG00000140463.12	0.38	0.19-0.76	0.006
ENSG00000140465.12	1.49	1.18-1.88	0.001
ENSG00000140505.6	2.93	1.78-4.8	0
ENSG00000140511.10	1.84	1-3.38	0.049
ENSG00000140534.12	3.02	1.37-6.65	0.006
ENSG00000140545.13	1.79	1.09-2.96	0.022
ENSG00000140553.15	5.67	1.54-20.87	0.009
ENSG00000140557.10	2.41	1.09-5.32	0.029
ENSG00000140650.10	0.46	0.21-0.98	0.043
ENSG00000140678.15	3.36	1.15-9.82	0.026
ENSG00000140682.17	2	1.24-3.25	0.005
ENSG00000140688.15	0.34	0.17-0.69	0.003
ENSG00000140694.15	0.27	0.14-0.51	0
ENSG00000140740.9	0.4	0.23-0.71	0.002
ENSG00000140873.14	2.94	1.15-7.49	0.024
ENSG00000140876.10	0.33	0.13-0.82	0.018
ENSG00000140931.18	2.19	1.04-4.62	0.039
ENSG00000140986.7	3.99	1.1-14.48	0.036
ENSG00000140987.18	0.12	0.02-0.57	0.008
ENSG00000141012.11	5.23	1.78-15.37	0.003
ENSG00000141127.13	0.53	0.3-0.94	0.03
ENSG00000141179.12	0.6	0.4-0.9	0.015
ENSG00000141198.12	0.64	0.43-0.97	0.034
ENSG00000141232.4	0.68	0.48-0.95	0.023
ENSG00000141338.12	0.49	0.26-0.9	0.021
ENSG00000141378.14	0.46	0.23-0.92	0.027
ENSG00000141384.10	0.45	0.21-1	0.049
ENSG00000141401.10	0.63	0.44-0.9	0.011
ENSG00000141485.14	1.5	1.09-2.07	0.013
ENSG00000141503.14	4.17	1.04-16.76	0.044
ENSG00000141574.6	1.75	1.09-2.82	0.021
ENSG00000141748.11	5.27	1.17-23.75	0.03
ENSG00000141756.17	1.91	1.24-2.93	0.003
ENSG00000141867.16	4.77	1.47-15.52	0.009
ENSG00000141873.9	5.7	1.49-21.85	0.011
ENSG00000141933.8	2.85	1.01-8.09	0.049
ENSG00000141985.8	3.63	1.51-8.73	0.004
ENSG00000142102.14	0.68	0.48-0.98	0.037
ENSG00000142156.13	4.8	1.93-11.93	0.001
ENSG00000142166.11	0.2	0.07-0.57	0.003
ENSG00000142173.13	1.64	1.07-2.51	0.022
ENSG00000142192.19	5.47	1.61-18.61	0.006
ENSG00000142327.10	3.18	1.36-7.44	0.008
ENSG00000142453.10	2.47	1.27-4.81	0.007
ENSG00000142549.9	5.94	2.15-16.39	0.001
ENSG00000142552.6	1.97	1.28-3.02	0.002
ENSG00000142583.16	2.16	1.1-4.26	0.026
ENSG00000142611.15	0.66	0.45-0.96	0.031
ENSG00000142661.17	5.23	1.21-22.66	0.027
ENSG00000142675.16	0.4	0.22-0.75	0.004
ENSG00000142676.11	0.22	0.09-0.53	0.001
ENSG00000142684.7	0.44	0.2-0.96	0.039
ENSG00000142686.7	2.19	1.05-4.55	0.036
ENSG00000142694.6	3.41	1.37-8.49	0.008
ENSG00000142751.13	0.32	0.13-0.76	0.01
ENSG00000142798.15	2.1	1.06-4.2	0.035
ENSG00000142892.13	0.53	0.3-0.94	0.029
ENSG00000142973.11	0.81	0.7-0.94	0.007
ENSG00000143067.4	2.41	1.16-4.99	0.018
ENSG00000143106.11	0.42	0.2-0.86	0.018
ENSG00000143153.11	0.69	0.48-0.99	0.042
ENSG00000143155.11	0.56	0.32-0.97	0.037
ENSG00000143158.9	0.34	0.18-0.65	0.001
ENSG00000143162.7	0.53	0.34-0.81	0.004
ENSG00000143164.14	0.27	0.12-0.64	0.003
ENSG00000143183.15	0.35	0.18-0.68	0.002
ENSG00000143207.18	0.52	0.29-0.91	0.023
ENSG00000143222.10	0.29	0.12-0.69	0.005
ENSG00000143224.16	0.24	0.08-0.74	0.013
ENSG00000143248.11	0.49	0.28-0.84	0.009
ENSG00000143257.10	10.25	1.84-57.17	0.008
ENSG00000143303.10	0.36	0.16-0.77	0.009
ENSG00000143322.18	3.64	1.38-9.62	0.009
ENSG00000143337.17	0.42	0.2-0.89	0.023
ENSG00000143353.10	0.53	0.33-0.86	0.01
ENSG00000143390.16	0.32	0.14-0.73	0.006
ENSG00000143409.14	2.75	1.2-6.3	0.017
ENSG00000143416.19	0.72	0.57-0.91	0.005
ENSG00000143457.9	0.56	0.34-0.94	0.029
ENSG00000143458.10	0.54	0.32-0.92	0.024
ENSG00000143553.9	0.46	0.21-0.98	0.044
ENSG00000143622.9	0.49	0.28-0.89	0.018
ENSG00000143633.11	0.51	0.33-0.78	0.002
ENSG00000143727.14	0.4	0.16-0.99	0.046
ENSG00000143748.16	0.34	0.16-0.75	0.008
ENSG00000143771.10	0.44	0.2-0.98	0.044
ENSG00000143819.11	0.74	0.55-1	0.048
ENSG00000143891.15	0.51	0.3-0.89	0.018
ENSG00000143947.11	0.11	0.02-0.54	0.007
ENSG00000143952.18	0.58	0.37-0.92	0.02
ENSG00000143954.11	4.15	1.3-13.23	0.016
ENSG00000144040.11	5.27	1.47-18.84	0.011
ENSG00000144057.14	1.68	1.18-2.4	0.004
ENSG00000144063.3	0.8	0.65-0.99	0.04
ENSG00000144136.9	1.57	1.06-2.31	0.023
ENSG00000144161.11	0.24	0.09-0.62	0.003
ENSG00000144182.15	0.57	0.35-0.94	0.026
ENSG00000144224.15	0.42	0.2-0.88	0.022
ENSG00000144227.4	14.95	1.59-140.74	0.018
ENSG00000144228.7	0.56	0.34-0.92	0.021
ENSG00000144278.13	5.21	1.57-17.31	0.007
ENSG00000144306.12	0.21	0.05-0.92	0.038
ENSG00000144339.10	3.05	1.02-9.15	0.047
ENSG00000144357.15	0.46	0.23-0.93	0.03
ENSG00000144445.14	0.38	0.16-0.93	0.033
ENSG00000144554.9	3.1	1.18-8.14	0.021
ENSG00000144645.12	5.05	2.04-12.46	0
ENSG00000144649.7	2.32	1.31-4.09	0.004
ENSG00000144659.9	0.36	0.15-0.84	0.018
ENSG00000144712.10	2.19	1.05-4.56	0.036
ENSG00000144834.11	2.47	1.27-4.81	0.008
ENSG00000144857.13	2.44	1.23-4.8	0.01
ENSG00000144895.10	0.63	0.42-0.94	0.023
ENSG00000145040.3	3.85	1.34-11.04	0.012
ENSG00000145217.12	4.01	1.05-15.28	0.042
ENSG00000145348.15	0.61	0.39-0.97	0.037
ENSG00000145349.15	0.59	0.35-0.98	0.042
ENSG00000145476.14	0.38	0.18-0.79	0.01
ENSG00000145536.14	1.65	1-2.73	0.049
ENSG00000145687.14	0.36	0.14-0.91	0.031
ENSG00000145700.8	5.75	1.19-27.88	0.03
ENSG00000145794.15	1.63	1.07-2.49	0.023
ENSG00000145826.7	17.63	3.3-94.28	0.001
ENSG00000145833.14	0.51	0.28-0.91	0.022
ENSG00000145864.11	2.28	1.17-4.42	0.015
ENSG00000145879.9	6.07	1.35-27.37	0.019
ENSG00000146005.3	4.9	1.39-17.23	0.013
ENSG00000146006.7	4.2	1.24-14.26	0.021
ENSG00000146039.9	15.49	1.6-149.82	0.018
ENSG00000146054.16	2	1.1-3.63	0.023
ENSG00000146085.7	0.63	0.42-0.96	0.03
ENSG00000146216.10	4.29	1.1-16.8	0.036
ENSG00000146233.6	0.27	0.08-0.88	0.03
ENSG00000146352.11	6.15	1.15-32.9	0.034
ENSG00000146409.9	0.66	0.44-0.99	0.046
ENSG00000146414.14	0.65	0.44-0.95	0.026
ENSG00000146416.15	3	1.06-8.51	0.039
ENSG00000146425.9	0.32	0.17-0.62	0.001
ENSG00000146463.10	0.58	0.34-0.97	0.04
ENSG00000146476.9	0.73	0.54-0.99	0.04
ENSG00000146530.10	2.58	1.37-4.87	0.003
ENSG00000146574.14	2.84	1.6-5.04	0
ENSG00000146670.8	1.37	1-1.86	0.047
ENSG00000146678.8	3.37	1.67-6.82	0.001
ENSG00000146729.8	0.68	0.47-0.99	0.043
ENSG00000146802.11	0.5	0.26-0.95	0.033
ENSG00000146839.17	4.43	1.19-16.47	0.026
ENSG00000146872.16	0.1	0.02-0.47	0.004
ENSG00000146926.9	6.49	1.42-29.61	0.016
ENSG00000147050.13	0.41	0.2-0.85	0.016
ENSG00000147121.14	0.34	0.18-0.61	0
ENSG00000147166.9	3.39	1.19-9.67	0.023
ENSG00000147202.16	0.47	0.25-0.86	0.015
ENSG00000147364.15	0.4	0.17-0.97	0.042
ENSG00000147400.8	0.5	0.28-0.89	0.019
ENSG00000147419.15	0.32	0.15-0.68	0.003
ENSG00000147586.8	0.58	0.39-0.85	0.006
ENSG00000147604.12	0.47	0.23-0.96	0.037
ENSG00000147642.15	0.75	0.6-0.93	0.009
ENSG00000147654.13	0.36	0.2-0.65	0.001
ENSG00000147676.12	0.74	0.58-0.96	0.023
ENSG00000147853.15	0.61	0.4-0.93	0.022
ENSG00000147872.8	4.6	1.86-11.38	0.001
ENSG00000147885.4	16.12	4.41-58.87	0
ENSG00000147912.11	6.64	1.1-40.17	0.039
ENSG00000148090.10	0.35	0.21-0.58	0
ENSG00000148156.7	6.77	1.16-39.54	0.034
ENSG00000148158.15	0.66	0.48-0.91	0.01
ENSG00000148175.11	0.48	0.23-0.97	0.041
ENSG00000148187.16	0.33	0.12-0.87	0.025
ENSG00000148346.10	0.77	0.64-0.93	0.007
ENSG00000148604.12	7.43	1.51-36.54	0.014
ENSG00000148677.6	1.72	1.17-2.52	0.006
ENSG00000148734.7	5.31	1.83-15.42	0.002
ENSG00000148803.10	2.48	1.38-4.43	0.002
ENSG00000148814.16	0.23	0.06-0.93	0.039
ENSG00000148835.10	0.47	0.24-0.9	0.023
ENSG00000148841.14	2.52	1.42-4.45	0.002
ENSG00000148848.13	1.58	1.14-2.2	0.007
ENSG00000148950.8	0.47	0.24-0.9	0.023
ENSG00000149084.10	0.02	0-0.31	0.005
ENSG00000149089.11	0.23	0.09-0.58	0.002
ENSG00000149150.7	1.94	1.05-3.6	0.035
ENSG00000149256.13	1.53	1.07-2.2	0.021
ENSG00000149257.12	1.89	1.2-2.98	0.006
ENSG00000149262.15	17.95	1.94-166.4	0.011
ENSG00000149289.9	0.4	0.19-0.85	0.018
ENSG00000149305.5	4.2	1.06-16.69	0.042
ENSG00000149308.15	0.31	0.11-0.91	0.032
ENSG00000149346.13	0.4	0.18-0.88	0.023
ENSG00000149380.10	2.49	1.04-5.99	0.041
ENSG00000149451.16	5.45	1.75-16.92	0.003
ENSG00000149531.13	3.39	1.25-9.23	0.017
ENSG00000149573.7	0.7	0.51-0.96	0.027
ENSG00000149577.14	2.43	1.1-5.36	0.028
ENSG00000149599.14	3.01	1.08-8.41	0.035
ENSG00000149633.10	4.55	1.71-12.1	0.002
ENSG00000149742.8	4.97	1.24-19.9	0.024
ENSG00000149782.10	3.57	1.3-9.82	0.013
ENSG00000149932.15	0.3	0.12-0.76	0.012
ENSG00000150337.12	3.41	1.16-10.07	0.026
ENSG00000150361.10	14.23	1.47-138.16	0.022
ENSG00000150401.13	0.18	0.07-0.43	0
ENSG00000150456.9	0.33	0.15-0.72	0.005
ENSG00000150457.8	3.32	1.02-10.82	0.046
ENSG00000150459.11	0.24	0.1-0.62	0.003
ENSG00000150540.12	0.43	0.2-0.93	0.031
ENSG00000150687.10	2.05	1.2-3.52	0.009
ENSG00000150712.9	0.46	0.23-0.93	0.03
ENSG00000150893.10	0.48	0.29-0.81	0.006
ENSG00000150938.8	0.68	0.48-0.97	0.032
ENSG00000151014.5	2.93	1.46-5.88	0.002
ENSG00000151150.19	0.57	0.38-0.85	0.005
ENSG00000151164.17	0	0-0.27	0.009
ENSG00000151176.6	3.56	1.51-8.37	0.004
ENSG00000151332.17	0.69	0.51-0.93	0.015
ENSG00000151388.9	1.98	1.13-3.48	0.017
ENSG00000151414.13	0.71	0.5-1	0.049
ENSG00000151461.18	0.57	0.36-0.89	0.013
ENSG00000151491.11	0.74	0.56-0.98	0.036
ENSG00000151498.10	0.65	0.47-0.9	0.01
ENSG00000151500.13	0.42	0.21-0.84	0.015
ENSG00000151611.12	0.26	0.09-0.77	0.015
ENSG00000151612.14	2.09	1.04-4.19	0.037
ENSG00000151640.11	2.66	1.32-5.39	0.006
ENSG00000151665.11	0.41	0.25-0.67	0
ENSG00000151690.13	0.59	0.39-0.88	0.009
ENSG00000151729.9	0.18	0.07-0.5	0.001
ENSG00000151806.12	0.37	0.18-0.76	0.007
ENSG00000151923.16	0.26	0.07-0.94	0.039
ENSG00000151929.8	1.89	1.23-2.92	0.004
ENSG00000152082.12	3.13	1.78-5.5	0
ENSG00000152128.13	0.76	0.61-0.95	0.014
ENSG00000152133.13	0.25	0.08-0.78	0.017
ENSG00000152214.11	4.81	1.01-22.85	0.048
ENSG00000152219.4	0.54	0.33-0.9	0.017
ENSG00000152223.11	4.29	1.11-16.58	0.035
ENSG00000152359.13	0.42	0.21-0.83	0.013
ENSG00000152377.11	1.37	1.12-1.67	0.002
ENSG00000152382.5	0.22	0.08-0.58	0.002
ENSG00000152443.11	0.49	0.25-0.95	0.036
ENSG00000152463.13	1.89	1.01-3.54	0.046
ENSG00000152464.13	0.3	0.14-0.66	0.003
ENSG00000152484.12	0.3	0.12-0.76	0.011
ENSG00000152520.12	0.57	0.35-0.93	0.025
ENSG00000152580.8	0.49	0.25-0.94	0.031
ENSG00000152582.11	0.07	0.01-0.74	0.027
ENSG00000152583.11	0.61	0.46-0.82	0.001
ENSG00000152595.15	2.95	1.12-7.78	0.029
ENSG00000152642.9	0.6	0.43-0.85	0.004
ENSG00000152795.16	0.35	0.17-0.73	0.005
ENSG00000152818.17	0.27	0.09-0.85	0.025
ENSG00000152904.10	0.59	0.38-0.93	0.021
ENSG00000152910.17	21.05	1.79-248.17	0.015
ENSG00000152932.7	5.79	1.61-20.74	0.007
ENSG00000152936.9	3.71	1.4-9.81	0.008
ENSG00000152954.10	4.66	1.48-14.7	0.009
ENSG00000152990.12	0.35	0.14-0.92	0.033
ENSG00000153029.13	0.52	0.29-0.94	0.03
ENSG00000153066.11	0.32	0.17-0.58	0
ENSG00000153093.17	0.44	0.19-0.99	0.046
ENSG00000153140.7	0.62	0.42-0.91	0.015
ENSG00000153187.15	0.42	0.21-0.86	0.017
ENSG00000153207.13	0.58	0.36-0.91	0.018
ENSG00000153253.14	1.28	1.02-1.61	0.033
ENSG00000153303.15	5.79	1.33-25.3	0.02
ENSG00000153446.14	0.85	0.75-0.96	0.011
ENSG00000153485.5	0.58	0.35-0.95	0.032
ENSG00000153495.9	5.08	1.02-25.3	0.047
ENSG00000153574.8	0.26	0.12-0.56	0.001
ENSG00000153774.7	2.15	1.07-4.35	0.033
ENSG00000153815.15	5.1	2.03-12.78	0.001
ENSG00000153823.17	0.37	0.17-0.81	0.014
ENSG00000153885.13	2.21	1.16-4.24	0.017
ENSG00000153976.2	1.77	1.27-2.46	0.001
ENSG00000154065.15	0.62	0.4-0.94	0.025
ENSG00000154096.12	1.62	1.14-2.32	0.007
ENSG00000154118.11	2	1.03-3.89	0.041
ENSG00000154252.11	8.04	2.92-22.14	0
ENSG00000154274.13	0.69	0.52-0.93	0.013
ENSG00000154305.15	0.45	0.22-0.92	0.029
ENSG00000154518.8	0.37	0.15-0.96	0.042
ENSG00000154553.12	2.09	1.23-3.56	0.007
ENSG00000154640.13	0.48	0.28-0.84	0.01
ENSG00000154719.12	0.36	0.15-0.88	0.026
ENSG00000154727.9	0.37	0.15-0.9	0.029
ENSG00000154767.13	0.37	0.17-0.82	0.015
ENSG00000154803.11	3.54	1.01-12.44	0.049
ENSG00000154920.13	2	1.02-3.9	0.043
ENSG00000154945.6	0.07	0.01-0.45	0.005
ENSG00000155034.17	3.54	1.18-10.65	0.024
ENSG00000155052.14	8.86	1.91-41.18	0.005
ENSG00000155085.14	0.23	0.06-0.9	0.035
ENSG00000155087.3	4.74	1.25-17.96	0.022
ENSG00000155158.19	0.4	0.21-0.76	0.005
ENSG00000155254.11	4.22	1.57-11.36	0.004
ENSG00000155363.17	2.2	1.01-4.8	0.047
ENSG00000155366.15	2.82	1.14-6.95	0.024
ENSG00000155368.15	0.37	0.19-0.74	0.005
ENSG00000155714.12	12.89	2.22-74.86	0.004
ENSG00000155729.11	0.3	0.11-0.81	0.017
ENSG00000155858.5	3.38	1.13-10.15	0.03
ENSG00000155886.10	2.16	1.15-4.05	0.016
ENSG00000155906.15	0.4	0.2-0.82	0.013
ENSG00000155959.9	0.66	0.45-0.96	0.032
ENSG00000155962.11	0.65	0.47-0.9	0.01
ENSG00000155980.10	5.66	1.09-29.31	0.039
ENSG00000156076.8	0.82	0.7-0.95	0.009
ENSG00000156097.11	3.94	1.13-13.72	0.031
ENSG00000156110.12	0.5	0.3-0.85	0.011
ENSG00000156171.13	0.59	0.37-0.94	0.025
ENSG00000156172.5	0.38	0.15-0.95	0.039
ENSG00000156232.7	0.46	0.23-0.92	0.028
ENSG00000156313.11	0.23	0.08-0.68	0.008
ENSG00000156345.16	0.39	0.15-0.99	0.048
ENSG00000156384.13	0.48	0.24-0.94	0.032
ENSG00000156482.9	0.23	0.09-0.61	0.003
ENSG00000156502.12	0.36	0.16-0.85	0.019
ENSG00000156504.15	0.48	0.24-0.97	0.041
ENSG00000156508.16	0.33	0.14-0.81	0.016
ENSG00000156709.12	0.46	0.27-0.8	0.006
ENSG00000156804.6	1.56	1.08-2.26	0.018
ENSG00000156920.9	14.51	2.84-74.18	0.001
ENSG00000157152.15	9.14	1.26-66.44	0.029
ENSG00000157193.13	0.62	0.39-0.99	0.046
ENSG00000157227.11	2.34	1.44-3.8	0.001
ENSG00000157350.11	3.2	1.17-8.78	0.024
ENSG00000157426.12	0.45	0.25-0.82	0.009
ENSG00000157456.6	2.77	1.24-6.19	0.013
ENSG00000157483.7	2.13	1.01-4.48	0.046
ENSG00000157570.10	1.68	1-2.81	0.049
ENSG00000157617.15	0.36	0.19-0.68	0.002
ENSG00000157764.11	0.38	0.16-0.88	0.024
ENSG00000157766.14	3.07	1.3-7.26	0.011
ENSG00000157796.16	0.13	0.03-0.56	0.006
ENSG00000157851.15	2.68	1.01-7.11	0.048
ENSG00000157869.13	0.42	0.19-0.93	0.033
ENSG00000157933.9	2.02	1.01-4.04	0.046
ENSG00000158169.10	4.3	1-18.41	0.049
ENSG00000158186.11	2.71	1.29-5.69	0.008
ENSG00000158201.8	0.59	0.37-0.94	0.025
ENSG00000158220.12	0.6	0.37-0.97	0.038
ENSG00000158234.11	0.65	0.43-1	0.048
ENSG00000158292.6	2.05	1.07-3.91	0.03
ENSG00000158402.17	2.75	1.18-6.38	0.019
ENSG00000158467.15	0.66	0.47-0.94	0.022
ENSG00000158571.9	9.34	1.59-54.73	0.013
ENSG00000158615.8	0.65	0.42-0.99	0.043
ENSG00000158623.13	0.2	0.06-0.69	0.011
ENSG00000158792.14	2.4	1.31-4.41	0.005
ENSG00000158793.12	0.35	0.14-0.87	0.025
ENSG00000158859.9	10.85	2.63-44.71	0.001
ENSG00000158863.20	3.79	1.14-12.54	0.029
ENSG00000158901.10	14.26	1.99-102.38	0.008
ENSG00000158941.15	0.16	0.03-0.79	0.024
ENSG00000159082.16	0.22	0.06-0.84	0.027
ENSG00000159202.16	2.67	1.23-5.8	0.013
ENSG00000159263.14	2.76	1.52-5.03	0.001
ENSG00000159307.17	5.44	1.22-24.19	0.026
ENSG00000159398.14	14.76	3.77-57.77	0
ENSG00000159459.10	0.52	0.28-0.96	0.036
ENSG00000159650.7	5.7	1.41-23.05	0.015
ENSG00000160050.13	2.86	1.01-8.08	0.047
ENSG00000160111.11	0.57	0.37-0.86	0.008
ENSG00000160124.8	0.62	0.39-0.97	0.035
ENSG00000160161.8	1.37	1.07-1.75	0.012
ENSG00000160182.2	1.19	1.04-1.37	0.014
ENSG00000160200.16	1.53	1.05-2.23	0.028
ENSG00000160201.10	3.97	1.18-13.32	0.026
ENSG00000160207.7	1.73	1.03-2.92	0.039
ENSG00000160214.11	5.16	1.81-14.68	0.002
ENSG00000160218.11	4.16	1.8-9.61	0.001
ENSG00000160233.7	4.48	1.15-17.36	0.03
ENSG00000160256.11	2.59	1.06-6.38	0.038
ENSG00000160282.12	4.85	1.42-16.55	0.012
ENSG00000160360.10	3.12	1.03-9.5	0.045
ENSG00000160613.11	3.83	1.39-10.55	0.009
ENSG00000160712.11	0.52	0.31-0.87	0.013
ENSG00000160714.8	0.36	0.13-0.96	0.041
ENSG00000160746.11	2.52	1.23-5.17	0.011
ENSG00000160789.18	2.93	1.1-7.83	0.032
ENSG00000160803.7	2.83	1.08-7.43	0.034
ENSG00000160868.13	22.71	2.63-195.73	0.004
ENSG00000160882.10	7.05	1.21-40.95	0.03
ENSG00000160951.3	3.44	1.1-10.75	0.033
ENSG00000160961.10	10.86	1.07-109.9	0.043
ENSG00000160972.8	0.6	0.38-0.96	0.032
ENSG00000160999.10	2.64	1.41-4.95	0.002
ENSG00000161057.9	0.5	0.29-0.88	0.016
ENSG00000161091.11	2.2	1.23-3.92	0.008
ENSG00000161544.8	3.3	1.08-10.03	0.036
ENSG00000161551.11	4.69	1.7-12.93	0.003
ENSG00000161638.9	2	1.21-3.32	0.007
ENSG00000161640.14	2.68	1.02-7.04	0.045
ENSG00000161692.16	2.67	1.01-7.08	0.049
ENSG00000161850.2	4.88	1.48-16.06	0.009
ENSG00000161888.10	2.19	1.12-4.29	0.022
ENSG00000161920.8	0.31	0.12-0.78	0.013
ENSG00000161944.15	3.54	1.39-9	0.008
ENSG00000161980.5	0.31	0.12-0.81	0.017
ENSG00000162065.10	0.59	0.4-0.89	0.011
ENSG00000162068.1	4.64	1.19-18.14	0.027
ENSG00000162069.13	0.58	0.34-0.96	0.036
ENSG00000162174.11	0.76	0.58-1	0.048
ENSG00000162188.5	4.23	1.14-15.66	0.031
ENSG00000162231.12	0.3	0.1-0.93	0.036
ENSG00000162344.3	1.46	1.13-1.9	0.004
ENSG00000162366.6	0.7	0.57-0.86	0.001
ENSG00000162368.12	0.44	0.22-0.87	0.019
ENSG00000162374.15	5.6	1.84-17.03	0.002
ENSG00000162390.16	13.45	4.08-44.32	0
ENSG00000162456.8	10.71	2.55-44.95	0.001
ENSG00000162490.6	4.09	1.08-15.54	0.039
ENSG00000162493.15	1.67	1.06-2.63	0.028
ENSG00000162522.9	0.56	0.32-1	0.049
ENSG00000162600.10	0.58	0.39-0.86	0.007
ENSG00000162604.11	0.42	0.18-0.99	0.046
ENSG00000162613.15	0.42	0.2-0.9	0.025
ENSG00000162642.12	0.43	0.22-0.88	0.02
ENSG00000162723.8	1.88	1.25-2.81	0.002
ENSG00000162728.4	6.29	1.02-38.64	0.047
ENSG00000162735.17	0.43	0.2-0.96	0.038
ENSG00000162745.9	1.48	1.06-2.07	0.022
ENSG00000162777.15	0.29	0.14-0.62	0.001
ENSG00000162783.10	1.57	1.01-2.44	0.045
ENSG00000162819.10	0.44	0.21-0.94	0.033
ENSG00000162849.14	2.02	1.13-3.59	0.017
ENSG00000162851.7	0.14	0.02-0.95	0.044
ENSG00000162877.11	3.66	1.4-9.58	0.008
ENSG00000162881.6	16.51	3.17-86.07	0.001
ENSG00000162891.9	6.88	1.79-26.36	0.005
ENSG00000162896.5	0.85	0.72-0.99	0.036
ENSG00000162927.12	0.15	0.04-0.48	0.002
ENSG00000162946.19	11.32	1.19-107.71	0.035
ENSG00000162961.12	0.49	0.31-0.76	0.002
ENSG00000162989.4	31.09	1.66-582.4	0.022
ENSG00000162998.4	0.59	0.37-0.95	0.029
ENSG00000163012.3	8.62	1.11-66.74	0.039
ENSG00000163017.12	1.73	1.04-2.88	0.034
ENSG00000163072.13	0.59	0.36-0.96	0.033
ENSG00000163104.16	0.45	0.24-0.82	0.009
ENSG00000163110.13	4.13	1.63-10.46	0.003
ENSG00000163138.17	0.31	0.11-0.87	0.025
ENSG00000163145.11	0.52	0.28-0.97	0.039
ENSG00000163161.11	0.22	0.1-0.49	0
ENSG00000163166.12	0.37	0.16-0.88	0.025
ENSG00000163217.1	3.41	1.17-9.96	0.025
ENSG00000163251.3	0.52	0.33-0.83	0.006
ENSG00000163312.9	0.24	0.06-0.97	0.046
ENSG00000163352.5	10.32	2.29-46.44	0.002
ENSG00000163359.14	1.87	1.07-3.27	0.028
ENSG00000163394.5	8.85	1.82-43.04	0.007
ENSG00000163399.14	0.42	0.22-0.8	0.009
ENSG00000163412.11	0.45	0.24-0.83	0.01
ENSG00000163462.16	4.29	1.31-14.05	0.016
ENSG00000163510.12	0.65	0.43-0.98	0.038
ENSG00000163528.11	0.33	0.14-0.76	0.009
ENSG00000163558.11	0.55	0.32-0.94	0.029
ENSG00000163576.16	0.17	0.03-0.96	0.045
ENSG00000163617.9	0.23	0.08-0.63	0.004
ENSG00000163624.5	0.52	0.3-0.9	0.02
ENSG00000163626.15	0.25	0.08-0.83	0.024
ENSG00000163636.9	0.25	0.07-0.89	0.033
ENSG00000163645.13	7.22	1.68-31	0.008
ENSG00000163660.10	0.37	0.15-0.89	0.027
ENSG00000163681.13	0.37	0.14-0.94	0.037
ENSG00000163682.14	0.08	0.02-0.33	0
ENSG00000163694.13	0.29	0.1-0.88	0.029
ENSG00000163738.17	0.15	0.03-0.73	0.018
ENSG00000163743.12	0.38	0.16-0.94	0.037
ENSG00000163749.16	11.03	1.03-117.55	0.047
ENSG00000163751.3	0.76	0.62-0.93	0.008
ENSG00000163793.11	5.81	1.69-19.95	0.005
ENSG00000163795.12	0.38	0.18-0.81	0.012
ENSG00000163810.10	5.16	1.1-24.24	0.037
ENSG00000163814.6	1.84	1.1-3.09	0.021
ENSG00000163818.15	0.35	0.13-0.92	0.033
ENSG00000163823.3	1.53	1-2.34	0.049
ENSG00000163867.15	0.06	0.01-0.49	0.008
ENSG00000163872.14	1.99	1.07-3.71	0.03
ENSG00000163873.8	4.53	1.04-19.69	0.044
ENSG00000163879.10	0.72	0.55-0.94	0.016
ENSG00000163888.3	3.74	1.44-9.75	0.007
ENSG00000163904.11	0.37	0.16-0.85	0.019
ENSG00000163909.7	2.8	1.06-7.4	0.037
ENSG00000163913.10	6.33	1.66-24.06	0.007
ENSG00000163932.12	0.34	0.19-0.62	0
ENSG00000163946.12	0.52	0.28-0.96	0.036
ENSG00000163975.10	1.6	1.08-2.37	0.018
ENSG00000164022.15	0.5	0.3-0.82	0.006
ENSG00000164023.13	0.61	0.38-0.97	0.036
ENSG00000164035.8	0.48	0.27-0.85	0.012
ENSG00000164039.13	0.39	0.18-0.87	0.022
ENSG00000164045.10	1.67	1.04-2.69	0.034
ENSG00000164049.13	11.87	3.16-44.55	0
ENSG00000164054.14	3.25	1.37-7.67	0.007
ENSG00000164073.8	0.43	0.19-0.94	0.034
ENSG00000164076.15	3.97	1.13-13.93	0.032
ENSG00000164082.13	4.1	1.25-13.42	0.02
ENSG00000164087.6	1.86	1.08-3.2	0.026
ENSG00000164099.3	0.37	0.18-0.76	0.007
ENSG00000164105.3	3.98	1.34-11.84	0.013
ENSG00000164107.8	3.76	1.27-11.13	0.017
ENSG00000164113.9	11.73	1.37-100.28	0.024
ENSG00000164118.11	0.45	0.2-1	0.049
ENSG00000164124.9	0.43	0.19-0.94	0.034
ENSG00000164169.11	0.51	0.28-0.93	0.027
ENSG00000164175.13	5.55	1.05-29.38	0.044
ENSG00000164187.6	0.33	0.13-0.85	0.021
ENSG00000164252.11	0.35	0.15-0.82	0.015
ENSG00000164265.7	0.84	0.76-0.93	0.001
ENSG00000164270.16	9.66	1.5-62.42	0.017
ENSG00000164306.9	0.48	0.27-0.85	0.011
ENSG00000164331.8	0.52	0.32-0.85	0.009
ENSG00000164342.11	0.47	0.27-0.79	0.005
ENSG00000164346.8	0.61	0.39-0.93	0.022
ENSG00000164393.7	9.9	1.93-50.78	0.006
ENSG00000164406.7	0.37	0.15-0.91	0.03
ENSG00000164430.14	3.71	1.07-12.81	0.038
ENSG00000164442.9	0.48	0.25-0.92	0.028
ENSG00000164494.10	0.39	0.2-0.79	0.008
ENSG00000164520.10	2.6	1.05-6.44	0.039
ENSG00000164600.5	4.26	1.01-18.06	0.049
ENSG00000164620.7	2.97	1.09-8.09	0.033
ENSG00000164626.8	0.78	0.61-0.99	0.038
ENSG00000164651.15	2.26	1.43-3.57	0
ENSG00000164654.14	0.43	0.2-0.92	0.029
ENSG00000164684.12	0.41	0.18-0.92	0.03
ENSG00000164692.16	1.98	1.28-3.06	0.002
ENSG00000164694.15	1.24	1-1.53	0.047
ENSG00000164695.4	0.65	0.45-0.95	0.026
ENSG00000164751.13	0.27	0.1-0.73	0.01
ENSG00000164794.7	10.92	2.17-54.88	0.004
ENSG00000164796.16	9.57	1.32-69.2	0.025
ENSG00000164808.15	0.42	0.21-0.85	0.016
ENSG00000164880.14	4.02	1.22-13.21	0.022
ENSG00000164919.9	0.57	0.34-0.95	0.033
ENSG00000164932.11	1.41	1.01-1.97	0.045
ENSG00000164975.14	0.19	0.04-0.78	0.021
ENSG00000165006.12	0.46	0.22-0.97	0.04
ENSG00000165060.10	0.22	0.06-0.78	0.019
ENSG00000165076.12	4.97	1.47-16.83	0.01
ENSG00000165092.11	0.74	0.6-0.92	0.007
ENSG00000165119.17	0.38	0.18-0.81	0.013
ENSG00000165185.13	0.41	0.21-0.82	0.011
ENSG00000165195.12	0.69	0.48-1	0.049
ENSG00000165202.3	15.14	2.16-106.24	0.006
ENSG00000165264.9	0.27	0.08-0.89	0.031
ENSG00000165322.16	0.69	0.49-0.96	0.028
ENSG00000165416.13	0.48	0.23-0.96	0.039
ENSG00000165474.5	1.21	1.03-1.43	0.023
ENSG00000165487.12	0.64	0.45-0.91	0.013
ENSG00000165494.9	0.22	0.1-0.51	0
ENSG00000165553.4	7.23	1.75-29.82	0.006
ENSG00000165609.11	0.36	0.2-0.65	0.001
ENSG00000165617.13	1.44	1.02-2.02	0.039
ENSG00000165621.7	2.62	1.1-6.26	0.03
ENSG00000165623.8	4.9	1.23-19.5	0.024
ENSG00000165646.10	0.37	0.14-0.97	0.044
ENSG00000165650.10	0.53	0.34-0.84	0.007
ENSG00000165660.7	0.46	0.25-0.84	0.011
ENSG00000165669.12	0.26	0.09-0.72	0.01
ENSG00000165672.6	0.29	0.13-0.61	0.001
ENSG00000165675.15	0.1	0.02-0.44	0.002
ENSG00000165775.16	0.17	0.04-0.73	0.018
ENSG00000165794.8	2.06	1.09-3.89	0.027
ENSG00000165813.15	0.5	0.26-0.96	0.038
ENSG00000165841.8	10.26	1.96-53.74	0.006
ENSG00000165861.12	3.92	1.58-9.76	0.003
ENSG00000165923.14	0.29	0.11-0.8	0.017
ENSG00000165929.11	0.57	0.34-0.95	0.032
ENSG00000165943.4	0.39	0.21-0.72	0.003
ENSG00000165995.17	2.68	1.32-5.42	0.006
ENSG00000166037.9	0.57	0.35-0.94	0.026
ENSG00000166091.18	4.39	1.06-18.17	0.041
ENSG00000166118.6	3.14	1.64-6	0.001
ENSG00000166148.3	5.03	1.7-14.89	0.004
ENSG00000166183.14	6.27	1.3-30.19	0.022
ENSG00000166192.13	0.3	0.1-0.89	0.03
ENSG00000166225.7	0.28	0.08-0.99	0.049
ENSG00000166228.7	0.46	0.28-0.76	0.003
ENSG00000166275.14	0.55	0.37-0.82	0.004
ENSG00000166295.7	0.16	0.05-0.49	0.001
ENSG00000166321.12	0.3	0.13-0.7	0.005
ENSG00000166341.7	2.37	1.27-4.43	0.007
ENSG00000166342.17	2.68	1.26-5.69	0.01
ENSG00000166347.17	0.45	0.29-0.69	0
ENSG00000166348.16	0.57	0.37-0.87	0.01
ENSG00000166352.14	0.47	0.23-0.92	0.029
ENSG00000166387.10	0.6	0.39-0.92	0.019
ENSG00000166411.12	0.36	0.14-0.89	0.027
ENSG00000166441.11	2.53	1.28-5	0.008
ENSG00000166448.13	0.78	0.61-1	0.048
ENSG00000166471.9	0.56	0.35-0.88	0.013
ENSG00000166478.8	0.48	0.24-0.95	0.035
ENSG00000166562.7	0.53	0.29-0.95	0.033
ENSG00000166669.12	0.27	0.11-0.62	0.002
ENSG00000166670.8	1.22	1.03-1.45	0.021
ENSG00000166689.13	0.65	0.43-0.98	0.038
ENSG00000166750.8	0.49	0.29-0.83	0.007
ENSG00000166797.9	0.53	0.32-0.88	0.013
ENSG00000166800.8	12.04	1.92-75.33	0.008
ENSG00000166821.7	0.39	0.2-0.76	0.005
ENSG00000166823.5	0.39	0.17-0.94	0.036
ENSG00000166828.2	0.59	0.36-0.98	0.041
ENSG00000166831.7	1.62	1.01-2.6	0.046
ENSG00000166855.8	0.6	0.39-0.94	0.026
ENSG00000166887.14	0.26	0.09-0.69	0.007
ENSG00000166923.9	1.29	1.06-1.58	0.012
ENSG00000166924.7	2.91	1.06-7.97	0.038
ENSG00000166938.11	0.51	0.27-0.98	0.043
ENSG00000166946.12	0.53	0.35-0.81	0.003
ENSG00000166947.10	4.42	1.36-14.4	0.013
ENSG00000166963.11	4.45	1.83-10.82	0.001
ENSG00000166965.11	3.39	1.07-10.72	0.038
ENSG00000166997.6	4.18	1.37-12.74	0.012
ENSG00000167011.7	3.93	1.15-13.44	0.029
ENSG00000167123.17	3.8	1.66-8.69	0.002
ENSG00000167157.10	2.27	1.39-3.72	0.001
ENSG00000167183.2	0.75	0.61-0.93	0.007
ENSG00000167220.10	0.4	0.23-0.68	0.001
ENSG00000167283.6	0.23	0.08-0.6	0.003
ENSG00000167332.7	9.41	1.13-78.46	0.038
ENSG00000167460.13	2.03	1.05-3.91	0.034
ENSG00000167513.7	1.51	1.09-2.08	0.013
ENSG00000167552.12	2.06	1.03-4.12	0.041
ENSG00000167562.10	4.96	1.16-21.13	0.03
ENSG00000167566.15	3.99	1.32-12.04	0.014
ENSG00000167617.2	1.59	1.15-2.21	0.005
ENSG00000167637.15	0.14	0.02-0.82	0.03
ENSG00000167654.16	2.75	1.02-7.38	0.045
ENSG00000167657.10	5.29	1.1-25.42	0.038
ENSG00000167664.7	4.91	2.17-11.12	0
ENSG00000167670.14	2.19	1-4.77	0.049
ENSG00000167680.14	4.32	1.28-14.62	0.019
ENSG00000167699.12	0.47	0.25-0.85	0.013
ENSG00000167723.13	23.96	3.06-187.45	0.002
ENSG00000167754.11	2	1.15-3.48	0.014
ENSG00000167771.5	2.37	1.33-4.23	0.003
ENSG00000167772.10	1.42	1.1-1.84	0.008
ENSG00000167774.2	0.3	0.1-0.92	0.035
ENSG00000167840.12	0.46	0.25-0.86	0.015
ENSG00000167842.14	0.54	0.33-0.87	0.012
ENSG00000167851.12	2.01	1.06-3.8	0.032
ENSG00000167863.10	0.14	0.03-0.55	0.005
ENSG00000167881.13	0.29	0.11-0.77	0.014
ENSG00000167889.11	4.98	1.78-13.94	0.002
ENSG00000167904.13	0.56	0.33-0.95	0.032
ENSG00000167994.10	5.37	1.6-17.97	0.006
ENSG00000167995.14	3.13	1.03-9.52	0.045
ENSG00000168005.7	2.72	1.2-6.18	0.017
ENSG00000168092.12	5.99	1.19-30.12	0.03
ENSG00000168101.13	0.52	0.27-1	0.049
ENSG00000168124.2	8.59	1.6-46.14	0.012
ENSG00000168135.4	8.97	1.26-63.71	0.028
ENSG00000168137.14	4.52	1.05-19.42	0.042
ENSG00000168158.3	4.61	1.97-10.75	0
ENSG00000168216.9	0.45	0.22-0.91	0.027
ENSG00000168260.2	4.23	1.78-10.07	0.001
ENSG00000168288.11	0.67	0.46-0.96	0.031
ENSG00000168334.8	2.65	1.86-3.78	0
ENSG00000168348.3	6.22	1.68-23.07	0.006
ENSG00000168356.10	77.45	4.97-1206.5	0.002
ENSG00000168418.7	5.83	1.78-19.14	0.004
ENSG00000168434.11	0.33	0.15-0.72	0.005
ENSG00000168447.9	0.77	0.61-0.99	0.039
ENSG00000168487.16	4.22	1.6-11.17	0.004
ENSG00000168491.8	0.04	0-0.46	0.01
ENSG00000168497.4	0.59	0.41-0.85	0.004
ENSG00000168542.11	1.5	1.04-2.18	0.032
ENSG00000168582.4	12.78	2.86-57.04	0.001
ENSG00000168621.13	2.68	1.25-5.75	0.011
ENSG00000168646.11	0.25	0.08-0.79	0.019
ENSG00000168724.13	0.31	0.12-0.85	0.022
ENSG00000168748.12	4.95	1.57-15.62	0.006
ENSG00000168803.13	0.14	0.03-0.68	0.015
ENSG00000168806.7	0.28	0.09-0.84	0.023
ENSG00000168826.14	0.16	0.05-0.51	0.002
ENSG00000168876.7	0.58	0.37-0.91	0.017
ENSG00000168887.9	0.33	0.14-0.79	0.012
ENSG00000168928.11	4.37	1.17-16.3	0.028
ENSG00000168944.14	0.34	0.14-0.87	0.024
ENSG00000168995.12	3.31	1.35-8.12	0.009
ENSG00000169006.6	3.79	1.01-14.24	0.048
ENSG00000169016.15	0.41	0.18-0.95	0.038
ENSG00000169047.5	1.66	1.1-2.49	0.015
ENSG00000169062.13	0.22	0.1-0.48	0
ENSG00000169071.13	1.71	1.16-2.52	0.006
ENSG00000169116.10	0.71	0.53-0.95	0.023
ENSG00000169131.9	0.43	0.22-0.82	0.01
ENSG00000169154.5	6.95	1.44-33.5	0.016
ENSG00000169184.5	1.44	1.03-2	0.03
ENSG00000169213.6	1.72	1.05-2.81	0.03
ENSG00000169231.12	2.41	1.23-4.74	0.011
ENSG00000169242.10	0.66	0.46-0.94	0.023
ENSG00000169258.6	4.06	1.22-13.53	0.022
ENSG00000169291.8	0.65	0.46-0.93	0.017
ENSG00000169313.9	0.21	0.05-0.95	0.043
ENSG00000169330.7	0.14	0.03-0.65	0.012
ENSG00000169372.11	0.4	0.19-0.87	0.02
ENSG00000169375.14	0.14	0.03-0.7	0.016
ENSG00000169397.3	7.13	2.62-19.41	0
ENSG00000169436.15	1.68	1.02-2.76	0.043
ENSG00000169598.14	0.33	0.17-0.65	0.001
ENSG00000169599.11	0.47	0.28-0.79	0.005
ENSG00000169604.18	2.24	1.15-4.37	0.018
ENSG00000169609.12	0.09	0.03-0.26	0
ENSG00000169635.8	1.99	1.01-3.91	0.045
ENSG00000169641.12	3.25	1.22-8.68	0.018
ENSG00000169689.13	0.45	0.23-0.88	0.02
ENSG00000169717.6	5.42	1.22-24.15	0.027
ENSG00000169752.15	9.42	1.18-74.96	0.034
ENSG00000169756.15	2.23	1.25-3.99	0.007
ENSG00000169762.15	0.11	0.03-0.41	0.001
ENSG00000169783.11	1.57	1.08-2.29	0.018
ENSG00000169857.6	2.1	1.08-4.06	0.028
ENSG00000169884.12	2.61	1.37-4.97	0.003
ENSG00000169905.11	0.24	0.06-0.92	0.037
ENSG00000169914.5	0.55	0.31-0.96	0.036
ENSG00000169992.8	4.31	1.14-16.29	0.031
ENSG00000170160.15	38.39	3.45-427.18	0.003
ENSG00000170190.14	0.48	0.28-0.81	0.006
ENSG00000170242.16	0.55	0.33-0.94	0.028
ENSG00000170248.12	0.56	0.32-0.99	0.047
ENSG00000170270.4	0.55	0.33-0.91	0.021
ENSG00000170279.2	8	2.03-31.57	0.003
ENSG00000170412.15	0.54	0.32-0.89	0.017
ENSG00000170423.11	4.57	1.29-16.18	0.019
ENSG00000170448.10	0.56	0.34-0.9	0.017
ENSG00000170502.11	0.49	0.27-0.87	0.015
ENSG00000170558.7	1.6	1.13-2.25	0.008
ENSG00000170581.12	3.24	1.23-8.5	0.017
ENSG00000170632.12	0.47	0.23-0.98	0.045
ENSG00000170647.3	0.59	0.4-0.87	0.008
ENSG00000170653.17	0.22	0.06-0.75	0.016
ENSG00000170689.9	2.03	1.05-3.94	0.035
ENSG00000170743.15	13.79	1.53-124.03	0.019
ENSG00000170779.10	1.59	1.03-2.46	0.037
ENSG00000170801.8	1.72	1.08-2.75	0.023
ENSG00000170855.3	0.39	0.16-0.98	0.046
ENSG00000170860.3	0.23	0.07-0.77	0.017
ENSG00000170871.10	0.49	0.29-0.83	0.008
ENSG00000170909.12	1.56	1.05-2.31	0.026
ENSG00000170949.16	9.96	2.72-36.52	0.001
ENSG00000170955.9	1.61	1.02-2.53	0.04
ENSG00000171051.7	1.91	1.04-3.49	0.036
ENSG00000171067.9	2.85	1.36-5.96	0.005
ENSG00000171094.14	2.5	1.38-4.55	0.003
ENSG00000171100.13	0.31	0.13-0.78	0.012
ENSG00000171103.9	0.57	0.33-0.97	0.038
ENSG00000171155.7	0.37	0.18-0.76	0.006
ENSG00000171163.14	0.49	0.27-0.92	0.026
ENSG00000171189.15	8.35	1.15-60.75	0.036
ENSG00000171202.5	0.57	0.36-0.9	0.015
ENSG00000171217.5	4.05	1.17-14.07	0.028
ENSG00000171236.9	0.62	0.44-0.86	0.004
ENSG00000171298.11	2.27	1.26-4.09	0.006
ENSG00000171403.8	2.73	1.01-7.38	0.048
ENSG00000171428.12	0.54	0.36-0.79	0.001
ENSG00000171450.5	1.58	1.06-2.35	0.024
ENSG00000171456.15	2.68	1.05-6.81	0.039
ENSG00000171462.13	1.9	1.19-3.04	0.008
ENSG00000171467.14	0.38	0.16-0.86	0.021
ENSG00000171490.11	0.43	0.24-0.77	0.005
ENSG00000171503.10	0.42	0.22-0.82	0.01
ENSG00000171532.4	5.52	1.52-20.02	0.009
ENSG00000171540.7	12.39	1.59-96.55	0.016
ENSG00000171564.10	1.35	1.08-1.68	0.008
ENSG00000171566.10	0.55	0.31-0.98	0.043
ENSG00000171611.8	4.62	1.02-20.92	0.047
ENSG00000171612.6	0.52	0.32-0.83	0.006
ENSG00000171634.15	0.47	0.23-0.95	0.035
ENSG00000171722.10	6.03	1.84-19.74	0.003
ENSG00000171772.14	4.44	1.19-16.61	0.027
ENSG00000171786.5	4.4	1.4-13.87	0.011
ENSG00000171806.10	0.6	0.38-0.94	0.027
ENSG00000171819.4	4.84	1.36-17.22	0.015
ENSG00000171840.10	0.65	0.45-0.93	0.02
ENSG00000171863.11	0.44	0.25-0.8	0.007
ENSG00000171872.4	6.67	1.24-35.8	0.027
ENSG00000171885.12	0.64	0.45-0.9	0.011
ENSG00000171914.13	4.47	1.32-15.16	0.016
ENSG00000171936.1	8.93	2.37-33.59	0.001
ENSG00000171942.4	3.81	1.44-10.08	0.007
ENSG00000172006.10	0.2	0.05-0.83	0.026
ENSG00000172020.11	3.25	1.34-7.88	0.009
ENSG00000172057.8	0.37	0.19-0.7	0.002
ENSG00000172061.8	1.56	1.06-2.31	0.026
ENSG00000172071.10	0.32	0.13-0.76	0.01
ENSG00000172073.3	5.83	1.72-19.72	0.005
ENSG00000172086.7	0.68	0.48-0.95	0.026
ENSG00000172175.11	0.59	0.35-0.99	0.045
ENSG00000172296.11	0.39	0.17-0.92	0.032
ENSG00000172456.15	0.35	0.13-0.94	0.038
ENSG00000172465.12	0.54	0.33-0.89	0.016
ENSG00000172568.4	7.22	1.85-28.27	0.005
ENSG00000172586.7	0.36	0.18-0.75	0.006
ENSG00000172590.17	2.05	1.06-3.97	0.033
ENSG00000172638.11	2.09	1.26-3.46	0.004
ENSG00000172671.18	0.11	0.02-0.76	0.025
ENSG00000172717.14	12.09	3.57-40.96	0
ENSG00000172733.11	7.84	1.28-48.06	0.026
ENSG00000172766.17	0.4	0.21-0.76	0.006
ENSG00000172809.11	3.97	1.1-14.35	0.035
ENSG00000172867.3	3.73	1.32-10.54	0.013
ENSG00000172890.10	3.04	1.04-8.87	0.042
ENSG00000173011.11	0.28	0.09-0.87	0.028
ENSG00000173068.16	1.84	1.11-3.06	0.019
[truncated: 700 more rows]

## Sheet: Supplement Table 4
	GSE30219_OS			GSE30219_DFS
gene_id	Hazard.Ratio	CI95	P.Value	Hazard.Ratio	CI95	P.Value
ENSG00000028528.13	0.12	0.04-0.38	0	0.06	0.01-0.3	0.001
ENSG00000068489.11	1.49	1.17-1.91	0.001	1.86	1.32-2.63	0
ENSG00000075218.17	2.38	1.44-3.91	0.001	4.46	2.27-8.75	0
ENSG00000075391.15	6.9	2.98-15.97	0	5.42	1.84-15.99	0.002
ENSG00000075618.16	1.65	1.19-2.27	0.002	1.75	1.11-2.77	0.017
ENSG00000101938.13	0.78	0.65-0.93	0.007	0.69	0.55-0.86	0.001
ENSG00000102409.9	0.65	0.49-0.87	0.003	0.66	0.45-0.96	0.031
ENSG00000103316.9	0.71	0.57-0.89	0.002	0.64	0.47-0.87	0.004
ENSG00000103811.14	0.69	0.49-0.96	0.028	0.52	0.34-0.79	0.002
ENSG00000108924.12	0.73	0.58-0.92	0.007	0.63	0.47-0.86	0.004
ENSG00000111275.11	0.52	0.33-0.83	0.006	0.5	0.28-0.9	0.021
ENSG00000111665.10	1.57	1.23-2	0	2.21	1.62-3.01	0
ENSG00000114812.11	0.45	0.27-0.75	0.002	0.33	0.17-0.64	0.001
ENSG00000117394.18	2.12	1.47-3.05	0	2.16	1.27-3.67	0.005
ENSG00000121104.6	0.47	0.26-0.84	0.011	0.27	0.12-0.6	0.001
ENSG00000121691.4	0.34	0.16-0.73	0.006	0.32	0.12-0.85	0.022
ENSG00000123485.10	1.5	1.18-1.91	0.001	1.82	1.31-2.53	0
ENSG00000133466.12	2.71	1.58-4.63	0	2.42	1.21-4.8	0.012
ENSG00000134013.14	4	1.98-8.06	0	3.33	1.37-8.13	0.008
ENSG00000134057.13	1.38	1.09-1.74	0.008	1.82	1.33-2.49	0
ENSG00000136943.9	1.65	1.28-2.11	0	1.72	1.28-2.32	0
ENSG00000143322.18	5.75	2.25-14.74	0	7.09	2.38-21.11	0
ENSG00000143416.19	0.44	0.27-0.71	0.001	0.53	0.29-0.94	0.031
ENSG00000146670.8	1.54	1.16-2.05	0.003	2.26	1.51-3.38	0
ENSG00000157227.11	3.31	1.81-6.07	0	2.77	1.29-5.92	0.009
ENSG00000163879.10	0.61	0.44-0.86	0.005	0.54	0.35-0.84	0.006
ENSG00000164794.7	13.65	2.1-88.89	0.006	86.78	10.47-719.25	0
ENSG00000173947.12	0.61	0.41-0.92	0.017	0.47	0.28-0.8	0.005
ENSG00000175592.7	2.15	1.58-2.92	0	2.3	1.59-3.32	0
ENSG00000176170.12	2.24	1.51-3.32	0	2.02	1.22-3.36	0.006
ENSG00000176749.7	3.16	1.53-6.53	0.002	4.08	1.7-9.82	0.002
ENSG00000180787.5	0.68	0.49-0.93	0.017	0.65	0.43-1	0.048
ENSG00000186377.7	0.63	0.51-0.79	0	0.68	0.52-0.89	0.005
ENSG00000189377.7	0.73	0.6-0.9	0.003	0.73	0.57-0.93	0.011
ENSG00000198768.9	1.76	1-3.09	0.048	2.13	1.19-3.83	0.011
ENSG00000204084.11	0.13	0.04-0.47	0.002	0.05	0.01-0.32	0.001

## Sheet: Supplement Table 5
lasso_result1	lasso_result2	lasso_result3	lasso_result4	lasso_result5	lasso_result6	lasso_result7	lasso_result8	lasso_result9	lasso_result10	lasso_result11	lasso_result12	lasso_result13	lasso_result14	lasso_result15	lasso_result16	lasso_result17	lasso_result18	lasso_result19	lasso_result20	lasso_result21	lasso_result22	lasso_result23	lasso_result24	lasso_result25	lasso_result26	lasso_result27	lasso_result28	lasso_result29	lasso_result30	lasso_result31	lasso_result32	lasso_result33	lasso_result34	lasso_result35	lasso_result36	lasso_result37	lasso_result38	lasso_result39	lasso_result40	lasso_result41	lasso_result42	lasso_result43	lasso_result44	lasso_result45	lasso_result46	lasso_result47	lasso_result48	lasso_result49	lasso_result50
ENSG00000075391.15	ENSG00000075391.15	ENSG00000075391.15	ENSG00000075391.15	ENSG00000075391.15	ENSG00000075391.15	ENSG00000075391.15	ENSG00000075391.15	ENSG00000075391.15	ENSG00000075391.15	ENSG00000075391.15	ENSG00000075391.15	ENSG00000075391.15	ENSG00000075391.15	ENSG00000075391.15	ENSG00000075391.15	ENSG00000075391.15	ENSG00000075391.15	ENSG00000075391.15	ENSG00000075391.15	ENSG00000075391.15	ENSG00000075391.15	ENSG00000075391.15	ENSG00000075391.15	ENSG00000075391.15	ENSG00000075391.15	ENSG00000075391.15	ENSG00000075391.15	ENSG00000075391.15	ENSG00000075391.15	ENSG00000075391.15	ENSG00000075391.15	ENSG00000075391.15	ENSG00000075391.15	ENSG00000075391.15	ENSG00000075391.15	ENSG00000075391.15	ENSG00000075391.15	ENSG00000075391.15	ENSG00000075391.15	ENSG00000075391.15	ENSG00000075391.15	ENSG00000075391.15	ENSG00000075391.15	ENSG00000075391.15	ENSG00000075391.15	ENSG00000075391.15	ENSG00000075391.15	ENSG00000075391.15	ENSG00000075391.15
ENSG00000102409.9	ENSG00000102409.9	ENSG00000102409.9	ENSG00000102409.9	ENSG00000102409.9	ENSG00000111665.10	ENSG00000102409.9	ENSG00000102409.9	ENSG00000102409.9	ENSG00000102409.9	ENSG00000102409.9	ENSG00000102409.9	ENSG00000102409.9	ENSG00000102409.9	ENSG00000102409.9	ENSG00000102409.9	ENSG00000102409.9	ENSG00000102409.9	ENSG00000102409.9	ENSG00000102409.9	ENSG00000102409.9	ENSG00000102409.9	ENSG00000102409.9	ENSG00000102409.9	ENSG00000102409.9	ENSG00000102409.9	ENSG00000102409.9	ENSG00000102409.9	ENSG00000102409.9	ENSG00000102409.9	ENSG00000102409.9	ENSG00000102409.9	ENSG00000102409.9	ENSG00000102409.9	ENSG00000102409.9	ENSG00000102409.9	ENSG00000102409.9	ENSG00000102409.9	ENSG00000102409.9	ENSG00000102409.9	ENSG00000102409.9	ENSG00000102409.9	ENSG00000102409.9	ENSG00000102409.9	ENSG00000102409.9	ENSG00000102409.9	ENSG00000102409.9	ENSG00000102409.9	ENSG00000102409.9	ENSG00000102409.9
ENSG00000111665.10	ENSG00000111665.10	ENSG00000111665.10	ENSG00000111665.10	ENSG00000111665.10	ENSG00000136943.9	ENSG00000111665.10	ENSG00000111665.10	ENSG00000111665.10	ENSG00000111665.10	ENSG00000111665.10	ENSG00000111665.10	ENSG00000111665.10	ENSG00000111665.10	ENSG00000111665.10	ENSG00000111665.10	ENSG00000111665.10	ENSG00000111665.10	ENSG00000111665.10	ENSG00000111665.10	ENSG00000111665.10	ENSG00000111665.10	ENSG00000111665.10	ENSG00000111665.10	ENSG00000111665.10	ENSG00000111665.10	ENSG00000111665.10	ENSG00000111665.10	ENSG00000111665.10	ENSG00000111665.10	ENSG00000111665.10	ENSG00000111665.10	ENSG00000111665.10	ENSG00000111665.10	ENSG00000111665.10	ENSG00000111665.10	ENSG00000111665.10	ENSG00000111665.10	ENSG00000111665.10	ENSG00000111665.10	ENSG00000111665.10	ENSG00000111665.10	ENSG00000111665.10	ENSG00000111665.10	ENSG00000111665.10	ENSG00000111665.10	ENSG00000111665.10	ENSG00000111665.10	ENSG00000111665.10	ENSG00000111665.10
ENSG00000133466.12	ENSG00000133466.12	ENSG00000133466.12	ENSG00000133466.12	ENSG00000133466.12	ENSG00000157227.11	ENSG00000133466.12	ENSG00000133466.12	ENSG00000133466.12	ENSG00000133466.12	ENSG00000133466.12	ENSG00000133466.12	ENSG00000133466.12	ENSG00000133466.12	ENSG00000133466.12	ENSG00000133466.12	ENSG00000133466.12	ENSG00000133466.12	ENSG00000133466.12	ENSG00000133466.12	ENSG00000133466.12	ENSG00000133466.12	ENSG00000133466.12	ENSG00000133466.12	ENSG00000133466.12	ENSG00000133466.12	ENSG00000133466.12	ENSG00000133466.12	ENSG00000133466.12	ENSG00000133466.12	ENSG00000133466.12	ENSG00000133466.12	ENSG00000133466.12	ENSG00000133466.12	ENSG00000133466.12	ENSG00000133466.12	ENSG00000133466.12	ENSG00000133466.12	ENSG00000133466.12	ENSG00000133466.12	ENSG00000133466.12	ENSG00000133466.12	ENSG00000133466.12	ENSG00000133466.12	ENSG00000133466.12	ENSG00000133466.12	ENSG00000133466.12	ENSG00000133466.12	ENSG00000133466.12	ENSG00000133466.12
ENSG00000136943.9	ENSG00000136943.9	ENSG00000136943.9	ENSG00000136943.9	ENSG00000136943.9	ENSG00000175592.7	ENSG00000136943.9	ENSG00000136943.9	ENSG00000136943.9	ENSG00000136943.9	ENSG00000136943.9	ENSG00000136943.9	ENSG00000136943.9	ENSG00000136943.9	ENSG00000136943.9	ENSG00000136943.9	ENSG00000136943.9	ENSG00000136943.9	ENSG00000136943.9	ENSG00000136943.9	ENSG00000136943.9	ENSG00000136943.9	ENSG00000136943.9	ENSG00000136943.9	ENSG00000136943.9	ENSG00000136943.9	ENSG00000136943.9	ENSG00000136943.9	ENSG00000136943.9	ENSG00000136943.9	ENSG00000136943.9	ENSG00000136943.9	ENSG00000136943.9	ENSG00000136943.9	ENSG00000136943.9	ENSG00000136943.9	ENSG00000136943.9	ENSG00000136943.9	ENSG00000136943.9	ENSG00000136943.9	ENSG00000136943.9	ENSG00000136943.9	ENSG00000136943.9	ENSG00000136943.9	ENSG00000136943.9	ENSG00000136943.9	ENSG00000136943.9	ENSG00000136943.9	ENSG00000136943.9	ENSG00000136943.9
ENSG00000143322.18	ENSG00000157227.11	ENSG00000143322.18	ENSG00000143322.18	ENSG00000143322.18	ENSG00000176170.12	ENSG00000157227.11	ENSG00000143322.18	ENSG00000157227.11	ENSG00000143322.18	ENSG00000157227.11	ENSG00000157227.11	ENSG00000143322.18	ENSG00000157227.11	ENSG00000143322.18	ENSG00000143322.18	ENSG00000157227.11	ENSG00000143322.18	ENSG00000157227.11	ENSG00000143322.18	ENSG00000143322.18	ENSG00000143322.18	ENSG00000143322.18	ENSG00000143322.18	ENSG00000157227.11	ENSG00000157227.11	ENSG00000143322.18	ENSG00000143322.18	ENSG00000157227.11	ENSG00000157227.11	ENSG00000143322.18	ENSG00000157227.11	ENSG00000157227.11	ENSG00000143322.18	ENSG00000157227.11	ENSG00000143322.18	ENSG00000143322.18	ENSG00000143322.18	ENSG00000143322.18	ENSG00000143322.18	ENSG00000157227.11	ENSG00000157227.11	ENSG00000143322.18	ENSG00000143322.18	ENSG00000143322.18	ENSG00000157227.11	ENSG00000157227.11	ENSG00000143322.18	ENSG00000143322.18	ENSG00000157227.11
ENSG00000157227.11	ENSG00000164794.7	ENSG00000157227.11	ENSG00000157227.11	ENSG00000157227.11	ENSG00000186377.7	ENSG00000164794.7	ENSG00000157227.11	ENSG00000164794.7	ENSG00000157227.11	ENSG00000164794.7	ENSG00000164794.7	ENSG00000157227.11	ENSG00000164794.7	ENSG00000157227.11	ENSG00000157227.11	ENSG00000164794.7	ENSG00000157227.11	ENSG00000164794.7	ENSG00000157227.11	ENSG00000157227.11	ENSG00000157227.11	ENSG00000157227.11	ENSG00000157227.11	ENSG00000164794.7	ENSG00000164794.7	ENSG00000157227.11	ENSG00000157227.11	ENSG00000164794.7	ENSG00000164794.7	ENSG00000157227.11	ENSG00000164794.7	ENSG00000164794.7	ENSG00000157227.11	ENSG00000164794.7	ENSG00000157227.11	ENSG00000157227.11	ENSG00000157227.11	ENSG00000157227.11	ENSG00000157227.11	ENSG00000175592.7	ENSG00000175592.7	ENSG00000157227.11	ENSG00000157227.11	ENSG00000157227.11	ENSG00000164794.7	ENSG00000164794.7	ENSG00000157227.11	ENSG00000157227.11	ENSG00000175592.7
ENSG00000164794.7	ENSG00000175592.7	ENSG00000164794.7	ENSG00000164794.7	ENSG00000164794.7	ENSG00000204084.11	ENSG00000175592.7	ENSG00000164794.7	ENSG00000175592.7	ENSG00000164794.7	ENSG00000175592.7	ENSG00000175592.7	ENSG00000164794.7	ENSG00000175592.7	ENSG00000164794.7	ENSG00000164794.7	ENSG00000175592.7	ENSG00000164794.7	ENSG00000175592.7	ENSG00000164794.7	ENSG00000164794.7	ENSG00000164794.7	ENSG00000164794.7	ENSG00000164794.7	ENSG00000175592.7	ENSG00000175592.7	ENSG00000164794.7	ENSG00000164794.7	ENSG00000175592.7	ENSG00000175592.7	ENSG00000164794.7	ENSG00000175592.7	ENSG00000175592.7	ENSG00000164794.7	ENSG00000175592.7	ENSG00000164794.7	ENSG00000164794.7	ENSG00000164794.7	ENSG00000164794.7	ENSG00000164794.7	ENSG00000176170.12	ENSG00000176170.12	ENSG00000164794.7	ENSG00000164794.7	ENSG00000164794.7	ENSG00000175592.7	ENSG00000175592.7	ENSG00000164794.7	ENSG00000164794.7	ENSG00000176170.12
ENSG00000175592.7	ENSG00000176170.12	ENSG00000175592.7	ENSG00000175592.7	ENSG00000175592.7		ENSG00000176170.12	ENSG00000175592.7	ENSG00000176170.12	ENSG00000175592.7	ENSG00000176170.12	ENSG00000176170.12	ENSG00000175592.7	ENSG00000176170.12	ENSG00000175592.7	ENSG00000175592.7	ENSG00000176170.12	ENSG00000175592.7	ENSG00000176170.12	ENSG00000175592.7	ENSG00000175592.7	ENSG00000175592.7	ENSG00000175592.7	ENSG00000175592.7	ENSG00000176170.12	ENSG00000176170.12	ENSG00000175592.7	ENSG00000175592.7	ENSG00000176170.12	ENSG00000176170.12	ENSG00000175592.7	ENSG00000176170.12	ENSG00000176170.12	ENSG00000175592.7	ENSG00000176170.12	ENSG00000175592.7	ENSG00000175592.7	ENSG00000175592.7	ENSG00000175592.7	ENSG00000175592.7	ENSG00000180787.5	ENSG00000180787.5	ENSG00000175592.7	ENSG00000175592.7	ENSG00000175592.7	ENSG00000176170.12	ENSG00000176170.12	ENSG00000175592.7	ENSG00000175592.7	ENSG00000180787.5
ENSG00000176170.12	ENSG00000180787.5	ENSG00000176170.12	ENSG00000176170.12	ENSG00000176170.12		ENSG00000180787.5	ENSG00000176170.12	ENSG00000180787.5	ENSG00000176170.12	ENSG00000180787.5	ENSG00000180787.5	ENSG00000176170.12	ENSG00000180787.5	ENSG00000176170.12	ENSG00000176170.12	ENSG00000180787.5	ENSG00000176170.12	ENSG00000180787.5	ENSG00000176170.12	ENSG00000176170.12	ENSG00000176170.12	ENSG00000176170.12	ENSG00000176170.12	ENSG00000180787.5	ENSG00000180787.5	ENSG00000176170.12	ENSG00000176170.12	ENSG00000180787.5	ENSG00000180787.5	ENSG00000176170.12	ENSG00000180787.5	ENSG00000180787.5	ENSG00000176170.12	ENSG00000180787.5	ENSG00000176170.12	ENSG00000176170.12	ENSG00000176170.12	ENSG00000176170.12	ENSG00000176170.12	ENSG00000186377.7	ENSG00000186377.7	ENSG00000176170.12	ENSG00000176170.12	ENSG00000176170.12	ENSG00000180787.5	ENSG00000180787.5	ENSG00000176170.12	ENSG00000176170.12	ENSG00000186377.7
ENSG00000180787.5	ENSG00000186377.7	ENSG00000180787.5	ENSG00000180787.5	ENSG00000180787.5		ENSG00000186377.7	ENSG00000180787.5	ENSG00000186377.7	ENSG00000180787.5	ENSG00000186377.7	ENSG00000186377.7	ENSG00000180787.5	ENSG00000186377.7	ENSG00000180787.5	ENSG00000180787.5	ENSG00000186377.7	ENSG00000180787.5	ENSG00000186377.7	ENSG00000180787.5	ENSG00000180787.5	ENSG00000180787.5	ENSG00000180787.5	ENSG00000180787.5	ENSG00000186377.7	ENSG00000186377.7	ENSG00000180787.5	ENSG00000180787.5	ENSG00000186377.7	ENSG00000186377.7	ENSG00000180787.5	ENSG00000186377.7	ENSG00000186377.7	ENSG00000180787.5	ENSG00000186377.7	ENSG00000180787.5	ENSG00000180787.5	ENSG00000180787.5	ENSG00000180787.5	ENSG00000180787.5	ENSG00000204084.11	ENSG00000204084.11	ENSG00000180787.5	ENSG00000180787.5	ENSG00000180787.5	ENSG00000186377.7	ENSG00000186377.7	ENSG00000180787.5	ENSG00000180787.5	ENSG00000204084.11
ENSG00000186377.7	ENSG00000204084.11	ENSG00000186377.7	ENSG00000186377.7	ENSG00000186377.7		ENSG00000204084.11	ENSG00000186377.7	ENSG00000204084.11	ENSG00000186377.7	ENSG00000204084.11	ENSG00000204084.11	ENSG00000186377.7	ENSG00000204084.11	ENSG00000186377.7	ENSG00000186377.7	ENSG00000204084.11	ENSG00000186377.7	ENSG00000204084.11	ENSG00000186377.7	ENSG00000186377.7	ENSG00000186377.7	ENSG00000186377.7	ENSG00000186377.7	ENSG00000204084.11	ENSG00000204084.11	ENSG00000186377.7	ENSG00000186377.7	ENSG00000204084.11	ENSG00000204084.11	ENSG00000186377.7	ENSG00000204084.11	ENSG00000204084.11	ENSG00000186377.7	ENSG00000204084.11	ENSG00000186377.7	ENSG00000186377.7	ENSG00000186377.7	ENSG00000186377.7	ENSG00000186377.7			ENSG00000186377.7	ENSG00000186377.7	ENSG00000186377.7	ENSG00000204084.11	ENSG00000204084.11	ENSG00000186377.7	ENSG00000186377.7
ENSG00000204084.11		ENSG00000204084.11	ENSG00000204084.11	ENSG00000204084.11			ENSG00000204084.11		ENSG00000204084.11			ENSG00000204084.11		ENSG00000204084.11	ENSG00000204084.11		ENSG00000204084.11		ENSG00000204084.11	ENSG00000204084.11	ENSG00000204084.11	ENSG00000204084.11	ENSG00000204084.11			ENSG00000204084.11	ENSG00000204084.11			ENSG00000204084.11			ENSG00000204084.11		ENSG00000204084.11	ENSG00000204084.11	ENSG00000204084.11	ENSG00000204084.11	ENSG00000204084.11			ENSG00000204084.11	ENSG00000204084.11	ENSG00000204084.11			ENSG00000204084.11	ENSG00000204084.11
genes	frequency
ENSG00000075391.15	1000
ENSG00000101938.13	14
ENSG00000102409.9	931
ENSG00000111665.10	1000
ENSG00000133466.12	931
ENSG00000136943.9	999
ENSG00000143322.18	630
ENSG00000157227.11	997
ENSG00000164794.7	830
ENSG00000173947.12	14
ENSG00000175592.7	1000
ENSG00000176170.12	1000
ENSG00000180787.5	931
ENSG00000186377.7	1000
ENSG00000204084.11	999
[truncated: 950 more columns]

## Sheet: Supplement Table 6
lasso_result1	lasso_result2	lasso_result3	lasso_result4	lasso_result5	lasso_result6	lasso_result7	lasso_result8	lasso_result9	lasso_result10	lasso_result11	lasso_result12	lasso_result13	lasso_result14	lasso_result15	lasso_result16	lasso_result17	lasso_result18	lasso_result19	lasso_result20	lasso_result21	lasso_result22	lasso_result23	lasso_result24	lasso_result25	lasso_result26	lasso_result27	lasso_result28	lasso_result29	lasso_result30	lasso_result31	lasso_result32	lasso_result33	lasso_result34	lasso_result35	lasso_result36	lasso_result37	lasso_result38	lasso_result39	lasso_result40	lasso_result41	lasso_result42	lasso_result43	lasso_result44	lasso_result45	lasso_result46	lasso_result47	lasso_result48	lasso_result49	lasso_result50
ENSG00000075391.15	ENSG00000075391.15	ENSG00000075391.15	ENSG00000075391.15	ENSG00000075391.15	ENSG00000075391.15	ENSG00000075391.15	ENSG00000075391.15	ENSG00000075391.15	ENSG00000075391.15	ENSG00000075391.15	ENSG00000075391.15	ENSG00000075391.15	ENSG00000075391.15	ENSG00000075391.15	ENSG00000075391.15	ENSG00000075391.15	ENSG00000075391.15	ENSG00000075391.15	ENSG00000075391.15	ENSG00000075391.15	ENSG00000075391.15	ENSG00000075391.15	ENSG00000075391.15	ENSG00000075391.15	ENSG00000075391.15	ENSG00000075391.15	ENSG00000075391.15	ENSG00000075391.15	ENSG00000075391.15	ENSG00000075391.15	ENSG00000075391.15	ENSG00000075391.15	ENSG00000075391.15	ENSG00000075391.15	ENSG00000075391.15	ENSG00000075391.15	ENSG00000075391.15	ENSG00000075391.15	ENSG00000075391.15	ENSG00000075391.15	ENSG00000075391.15	ENSG00000075391.15	ENSG00000075391.15	ENSG00000075391.15	ENSG00000075391.15	ENSG00000075391.15	ENSG00000075391.15	ENSG00000075391.15	ENSG00000075391.15
ENSG00000103316.9	ENSG00000103316.9	ENSG00000103316.9	ENSG00000103316.9	ENSG00000103316.9	ENSG00000103316.9	ENSG00000103316.9	ENSG00000103316.9	ENSG00000103316.9	ENSG00000103316.9	ENSG00000103316.9	ENSG00000103316.9	ENSG00000103316.9	ENSG00000103316.9	ENSG00000103316.9	ENSG00000103316.9	ENSG00000103316.9	ENSG00000103316.9	ENSG00000103316.9	ENSG00000103316.9	ENSG00000103316.9	ENSG00000103316.9	ENSG00000103316.9	ENSG00000103316.9	ENSG00000103316.9	ENSG00000103316.9	ENSG00000103316.9	ENSG00000103316.9	ENSG00000103316.9	ENSG00000103316.9	ENSG00000103316.9	ENSG00000103316.9	ENSG00000103316.9	ENSG00000103316.9	ENSG00000103316.9	ENSG00000103316.9	ENSG00000103316.9	ENSG00000103316.9	ENSG00000103316.9	ENSG00000103316.9	ENSG00000103316.9	ENSG00000103316.9	ENSG00000103316.9	ENSG00000103316.9	ENSG00000103316.9	ENSG00000103316.9	ENSG00000103316.9	ENSG00000103316.9	ENSG00000103316.9	ENSG00000103316.9
ENSG00000111665.10	ENSG00000111665.10	ENSG00000111665.10	ENSG00000111665.10	ENSG00000111665.10	ENSG00000111665.10	ENSG00000111665.10	ENSG00000111665.10	ENSG00000111665.10	ENSG00000111665.10	ENSG00000111665.10	ENSG00000111665.10	ENSG00000111665.10	ENSG00000111665.10	ENSG00000111665.10	ENSG00000111665.10	ENSG00000111665.10	ENSG00000111665.10	ENSG00000111665.10	ENSG00000111665.10	ENSG00000111665.10	ENSG00000111665.10	ENSG00000111665.10	ENSG00000111665.10	ENSG00000111665.10	ENSG00000111665.10	ENSG00000111665.10	ENSG00000111665.10	ENSG00000111665.10	ENSG00000111665.10	ENSG00000111665.10	ENSG00000111665.10	ENSG00000111665.10	ENSG00000111665.10	ENSG00000111665.10	ENSG00000111665.10	ENSG00000111665.10	ENSG00000111665.10	ENSG00000111665.10	ENSG00000111665.10	ENSG00000111665.10	ENSG00000111665.10	ENSG00000111665.10	ENSG00000111665.10	ENSG00000111665.10	ENSG00000111665.10	ENSG00000111665.10	ENSG00000111665.10	ENSG00000111665.10	ENSG00000111665.10
ENSG00000163879.10	ENSG00000163879.10	ENSG00000163879.10	ENSG00000163879.10	ENSG00000163879.10	ENSG00000163879.10	ENSG00000163879.10	ENSG00000163879.10	ENSG00000163879.10	ENSG00000163879.10	ENSG00000163879.10	ENSG00000163879.10	ENSG00000163879.10	ENSG00000163879.10	ENSG00000163879.10	ENSG00000163879.10	ENSG00000163879.10	ENSG00000163879.10	ENSG00000163879.10	ENSG00000163879.10	ENSG00000163879.10	ENSG00000163879.10	ENSG00000163879.10	ENSG00000163879.10	ENSG00000163879.10	ENSG00000163879.10	ENSG00000163879.10	ENSG00000163879.10	ENSG00000163879.10	ENSG00000163879.10	ENSG00000163879.10	ENSG00000163879.10	ENSG00000163879.10	ENSG00000163879.10	ENSG00000163879.10	ENSG00000163879.10	ENSG00000163879.10	ENSG00000163879.10	ENSG00000163879.10	ENSG00000164794.7	ENSG00000163879.10	ENSG00000163879.10	ENSG00000163879.10	ENSG00000163879.10	ENSG00000163879.10	ENSG00000163879.10	ENSG00000163879.10	ENSG00000163879.10	ENSG00000163879.10	ENSG00000163879.10
ENSG00000164794.7	ENSG00000164794.7	ENSG00000164794.7	ENSG00000164794.7	ENSG00000164794.7	ENSG00000164794.7	ENSG00000164794.7	ENSG00000164794.7	ENSG00000164794.7	ENSG00000164794.7	ENSG00000164794.7	ENSG00000164794.7	ENSG00000164794.7	ENSG00000164794.7	ENSG00000164794.7	ENSG00000164794.7	ENSG00000164794.7	ENSG00000164794.7	ENSG00000164794.7	ENSG00000164794.7	ENSG00000164794.7	ENSG00000164794.7	ENSG00000164794.7	ENSG00000164794.7	ENSG00000164794.7	ENSG00000164794.7	ENSG00000164794.7	ENSG00000164794.7	ENSG00000164794.7	ENSG00000164794.7	ENSG00000164794.7	ENSG00000164794.7	ENSG00000164794.7	ENSG00000164794.7	ENSG00000164794.7	ENSG00000164794.7	ENSG00000164794.7	ENSG00000164794.7	ENSG00000164794.7	ENSG00000175592.7	ENSG00000164794.7	ENSG00000164794.7	ENSG00000164794.7	ENSG00000164794.7	ENSG00000164794.7	ENSG00000164794.7	ENSG00000164794.7	ENSG00000164794.7	ENSG00000164794.7	ENSG00000164794.7
ENSG00000175592.7	ENSG00000175592.7	ENSG00000175592.7	ENSG00000175592.7	ENSG00000175592.7	ENSG00000175592.7	ENSG00000175592.7	ENSG00000175592.7	ENSG00000175592.7	ENSG00000175592.7	ENSG00000175592.7	ENSG00000175592.7	ENSG00000175592.7	ENSG00000175592.7	ENSG00000175592.7	ENSG00000175592.7	ENSG00000175592.7	ENSG00000175592.7	ENSG00000175592.7	ENSG00000175592.7	ENSG00000175592.7	ENSG00000175592.7	ENSG00000175592.7	ENSG00000175592.7	ENSG00000175592.7	ENSG00000175592.7	ENSG00000175592.7	ENSG00000175592.7	ENSG00000175592.7	ENSG00000175592.7	ENSG00000175592.7	ENSG00000175592.7	ENSG00000175592.7	ENSG00000175592.7	ENSG00000175592.7	ENSG00000175592.7	ENSG00000175592.7	ENSG00000175592.7	ENSG00000175592.7	ENSG00000204084.11	ENSG00000175592.7	ENSG00000175592.7	ENSG00000175592.7	ENSG00000175592.7	ENSG00000175592.7	ENSG00000175592.7	ENSG00000175592.7	ENSG00000175592.7	ENSG00000175592.7	ENSG00000175592.7
ENSG00000204084.11	ENSG00000204084.11	ENSG00000204084.11	ENSG00000204084.11	ENSG00000204084.11	ENSG00000204084.11	ENSG00000204084.11	ENSG00000204084.11	ENSG00000204084.11	ENSG00000204084.11	ENSG00000204084.11	ENSG00000204084.11	ENSG00000204084.11	ENSG00000204084.11	ENSG00000204084.11	ENSG00000204084.11	ENSG00000204084.11	ENSG00000204084.11	ENSG00000204084.11	ENSG00000204084.11	ENSG00000204084.11	ENSG00000204084.11	ENSG00000204084.11	ENSG00000204084.11	ENSG00000204084.11	ENSG00000204084.11	ENSG00000204084.11	ENSG00000204084.11	ENSG00000204084.11	ENSG00000204084.11	ENSG00000204084.11	ENSG00000204084.11	ENSG00000204084.11	ENSG00000204084.11	ENSG00000204084.11	ENSG00000204084.11	ENSG00000204084.11	ENSG00000204084.11	ENSG00000204084.11		ENSG00000204084.11	ENSG00000204084.11	ENSG00000204084.11	ENSG00000204084.11	ENSG00000204084.11	ENSG00000204084.11	ENSG00000204084.11	ENSG00000204084.11	ENSG00000204084.11	ENSG00000204084.11
genes	frequency
ENSG00000075391.15	1000		ENSG00000075391
ENSG00000103316.9	1000
ENSG00000111665.10	1000
ENSG00000121104.6	7
ENSG00000133466.12	1
ENSG00000143416.19	1
ENSG00000163879.10	972
ENSG00000164794.7	1000
ENSG00000175592.7	1000
ENSG00000204084.11	1000
[truncated: 950 more columns]

## Sheet: Supplement Table 7
Datasets	Sample	W test	P.Value	Distribution	Cut-off
GSE30219	81	0.81282	9.517e-09	skewed distribution	31.0243
GSE50081_DFS	122	0.96975	0.007611	skewed distribution	29.8776
GSE50081_OS	125	0.97271	0.01237	skewed distribution	30.0108
TCGA	227	0.98358	0.009894	skewed distribution	50.0533
GSE31210	226	0.89249	1.268e-11	skewed distribution	35.7307

## Sheet: Supplement Table 8
Clinical parameters of GSE50081
futime	fustatus	gender	age	Smoking	T_Stage	N_Stage
448.95	1	F	Young	N	T1	N0
3971.2	0	M	Older	Y	T2	N0
1474.6	1	M	Older	Y	T1	N1
32.85	0	M	Older	N	T2	N1
36.5	1	F	Older	Y	T2	N1
43.8	0	F	Older	Y	T2	N0
204.4	1	F	Young	Y	T2	N0
54.75	0	F	Older	N	T2	N0
120.45	0	M	Young	Y	T2	N1
2098.75	0	M	Young	Y	T2	N0
113.15	1	M	Older	Y	T2	N0
186.15	0	F	Older	N	T1	N0
208.05	1	M	Older	Y	T2	N0
456.25	1	F	Young	Y	T2	N0
219	1	F	Older	Y	T1	N0
237.25	1	M	Older	N	T1	N0
737.3	1	M	Older	Y	T2	N1
259.15	0	M	Young	Y	T2	N1
401.5	1	F	Young	Y	T2	N1
1171.65	1	M	Young	Y	T2	N0
292	1	M	Young	Y	T2	N1
354.05	1	M	Young	Y	T2	N0
332.15	1	F	Young	Y	T2	N0
375.95	1	M	Young	Y	T2	N1
438	1	F	Older	Y	T2	N1
543.85	1	M	Older	Y	T2	N1
1168	1	M	Older	N	T2	N0
2211.9	0	F	Young	Y	T2	N0
459.9	0	F	Young	Y	T1	N1
463.55	0	F	Older	Y	T1	N0
686.2	1	M	Young	N	T1	N0
500.05	0	M	Young	Y	T1	N1
554.8	1	M	Older	Y	T2	N0
562.1	0	M	Older	Y	T2	N0
580.35	1	F	Older	Y	T2	N1
697.15	1	M	Young	Y	T2	N0
624.15	0	M	Young	Y	T2	N0
1974.65	0	F	Young	N	T2	N0
2113.35	1	M	Young	Y	T1	N1
657	1	M	Older	Y	T2	N1
1470.95	1	F	Older	N	T2	N0
697.15	1	F	Young	Y	T2	N0
711.75	1	F	Young	Y	T2	N0
770.15	1	M	Young	Y	T2	N1
2011.15	0	M	Young	Y	T2	N0
952.65	1	M	Older	Y	T2	N1
981.85	0	F	Older	N	T2	N0
1270.2	1	M	Older	Y	T2	N0
989.15	0	F	Young	Y	T2	N0
1127.85	1	F	Older	Y	T2	N0
1036.6	1	M	Older	Y	T2	N0
1098.65	1	M	Young	Y	T2	N1
1251.95	0	F	Older	N	T2	N0
1065.8	1	F	Older	Y	T2	N0
1419.85	1	M	Older	Y	T1	N0
1076.75	0	F	Young	N	T1	N0
2441.85	0	F	Young	N	T1	N1
1135.15	0	F	Older	Y	T2	N0
1146.1	1	M	Older	Y	T1	N0
1171.65	0	M	Older	Y	T1	N0
1233.7	0	F	Older	Y	T2	N1
1792.15	1	M	Young	Y	T2	N0
1930.85	0	F	Young	Y	T1	N0
1489.2	1	F	Older	N	T2	N1
1405.25	1	M	Young	Y	T1	N1
2686.4	0	F	Older	Y	T2	N1
1507.45	0	F	Young	Y	T1	N1
1580.45	1	M	Older	Y	T2	N0
1518.4	0	F	Young	Y	T1	N0
1522.05	0	M	Young	Y	T1	N0
1584.1	0	M	Young	Y	T2	N0
1595.05	1	M	Older	Y	T2	N0
1657.1	0	M	Older	Y	T1	N0
1668.05	0	F	Older	Y	T1	N0
1748.35	1	F	Young	Y	T2	N0
1868.8	0	F	Older	Y	T2	N1
1792.15	0	F	Young	Y	T1	N0
1799.45	0	F	Young	Y	T1	N0
1806.75	0	F	Older	N	T1	N0
2022.1	0	M	Young	N	T2	N1
1821.35	0	F	Young	N	T1	N0
1825	0	F	Young	N	T1	N0
1832.3	0	M	Older	Y	T2	N0
1835.95	0	F	Young	N	T2	N0
1861.5	0	F	Older	Y	T2	N0
1872.45	0	M	Older	Y	T2	N1
1883.4	0	F	Older	Y	T2	N1
1887.05	0	M	Young	Y	T2	N0
1890.7	0	M	Young	Y	T2	N0
1898	0	M	Young	Y	T1	N0
1919.9	1	M	Older	Y	T2	N1
1923.55	0	M	Young	Y	T1	N0
1941.8	0	F	Older	Y	T2	N0
1967.35	0	M	Older	Y	T1	N0
1989.25	0	M	Young	Y	T2	N0
2003.85	0	M	Young	Y	T2	N0
2029.4	0	F	Older	Y	T1	N0
2054.95	1	F	Young	Y	T2	N1
2095.1	1	F	Young	N	T1	N0
2175.4	1	F	Older	N	T2	N0
2102.4	0	M	Older	Y	T1	N0
2131.6	0	M	Older	Y	T1	N0
2131.6	0	F	Young	Y	T2	N1
2131.6	0	F	Older	N	T2	N0
2186.35	0	F	Young	Y	T2	N0
2197.3	0	M	Young	Y	T2	N0
2270.3	0	F	Young	N	T2	N0
2292.2	0	M	Older	Y	T1	N0
2303.15	0	M	Young	Y	T1	N0
2317.75	1	M	Older	N	T2	N0
2325.05	0	M	Older	Y	T2	N0
2325.05	0	M	Young	Y	T1	N0
2332.35	0	M	Older	Y	T2	N0
2357.9	0	M	Older	Y	T2	N0
2394.4	0	F	Older	Y	T2	N1
2434.55	0	F	Young	Y	T1	N0
2467.4	0	M	Young	Y	T1	N0
2496.6	0	F	Older	Y	T1	N0
2671.8	0	M	Young	Y	T2	N0
2693.7	0	F	Young	Y	T1	N0
2744.8	0	F	Young	Y	T1	N0
2777.65	1	F	Older	Y	T2	N0
2828.75	0	F	Young	N	T2	N0
2857.95	0	F	Older	Y	T2	N0
3014.9	0	M	Older	N	T1	N0

## Sheet: Supplement Table 9
TCGA_OS	Univariate			Multivariate
characteristics	Hazard.Ratio.x	CI95.x	P.Value.x	Hazard.Ratio.y	CI95.y	P.Value.y
age	1.02	0.99-1.04	0.245	NA	NA	NA
gender	0.8	0.51-1.26	0.343	NA	NA	NA
N_stage	2.22	1.43-3.45	0	1.97	1.25-3.11	0.004
signature	1.08	1.03-1.14	0.003	1.06	1.01-1.12	0.032
smoking	1.16	0.72-1.86	0.541	NA	NA	NA
T_stage	1.37	0.85-2.21	0.194	NA	NA	NA
